# Supplementary material for: Aging-related CD8 + T cell alterations and calcium/calmodulin dependent protein kinase 1D activation in the pathogenesis of diabetic kidney disease
Source: PeerJ journal article supplement (doi:10.7717/peerj.20762), 2026-02-13
Supplement: Supplementary_table_1.docx [file Supplementary_table_1.docx]

**Supplementary table 1** Patient Information of Single-Cell RNA Sequencing Analysis.

| Participant ID | GEO dataset | Tissue Source | Group | Sex | Age (Years) | Race |
| --- | --- | --- | --- | --- | --- | --- |
| 31-10001 | GSE183276 | Kidney | DKD | Male | 70-79 | White |
| 31-10040 | GSE183276 | Kidney | DKD | Female | 70-79 | White |
| 31-10042 | GSE183276 | Kidney | DKD | Female | 60-69 | White |
| HK1584 | GSE211785 | Kidney | DKD | Female | 59 | White |
| HK1634 | GSE211785 | Kidney | DKD | Male | 67 | White |
| HK1635 | GSE211785 | Kidney | DKD | Male | 70 | White |
|  |  |  |  |  |  |  |
| Sample1153-EO1 | GSE183276 | Kidney | Young | Female | 30-39 | NA |
| Sample1158-EO3 | GSE183276 | Kidney | Young | Female | 30-39 | NA |
| Sample1162-EO1 | GSE183276 | Kidney | Young | Male | 30-39 | NA |
| HK2713 | GSE211785 | Kidney | Young | Female | 33 | African-American |
| HK2893 | GSE211785 | Kidney | Young | Male | 37 | White |
| HK2899 | GSE211785 | Kidney | Young | Male | 39 | Multi-Racial |
|  |  |  |  |  |  |  |
| PRE055-1 | GSE183276 | Kidney | Old | Male | 60-69 | NA |
| HK1585 | GSE211785 | Kidney | Old | Female | 69 | White |
| HK1997 | GSE211785 | Kidney | Old | Male | 71 | White |
| HK2662 | GSE211785 | Kidney | Old | Female | 72 | White |
| HK2833 | GSE211785 | Kidney | Old | Male | 72 | White |
| HK2924 | GSE211785 | Kidney | Old | Male | 67 | African-American |
