# Supplementary material for: Aging-related CD8 + T cell alterations and calcium/calmodulin dependent protein kinase 1D activation in the pathogenesis of diabetic kidney disease
Source: PeerJ journal article supplement (doi:10.7717/peerj.20762), 2026-02-13
Supplement: Supplementary_table_2.docx [file Supplementary_table_2.docx]

**Supplementary table 2** Sc-type nature annotation

| **Tissue Type** | **Cell Name** | **Gene Symbolmore1** | **Gene Symbolmore2** | **ShortName** |
| --- | --- | --- | --- | --- |
| B cells | Pro-B cells | CD27,IgD,CD24,PTPRC,PAX5,CD24,CD38,CD79A,DNTT,C10orf10,VPREB1,ARPP21,CD99,IGLL1,CD9,CD79B,TCL1A,IGLL5,HLA-DQA1,HLA-DQB1,VPREB3,IGLL5 |  | Pro-B |
| B cells | Pre-B cells | CD19,CD27,IgD,CD24,PTPRC,PAX5,CD24,CD38,CD79A,NSMCE1,PCDH9,ACSM3,CCDC191,TCL1A,CD79B,TCL1A,IGLL5,HLA-DQA1,HLA-DQB1,VPREB3,IGLL5 |  | Pre-B |
| B cells | Naive B cells | CD19,IgD,CD38,CD24,CD20,MS4A1,PTPRC,PAX5,CD24,CD38,CD79A,JCHAIN,SSR4,FKBP11,SEC11C,DERL3,PRDX4,IGLL5,CD79B,TCL1A,IGLL5,HLA-DQA1,HLA-DQB1,CD138,CD38,VPREB3,IGLL5 |  | Naive B |
| B cells | Memory B cells | CD19,CD27,IgD,CD38,CD24,CD20,MS4A1,PTPRC,PAX5,CD24,CD38,CD79A,JCHAIN,SSR4,FKBP11,SEC11C,DERL3,PRDX4,IGLL5,CD79B,TCL1A,IGLL5,HLA-DQA1,HLA-DQB1,CD138,CD38,CD27,VPREB3,IGLL5 |  | Memory B |
| B cells | Plasma B cells | CD27,IgD,CD38,CD24,CD20,MS4A1,PTPRC,PAX5,CD24,CD38,CD79A,JCHAIN,SSR4,FKBP11,SEC11C,DERL3,PRDX4,IGLL5,CD79B,TCL1A,IGLL5,HLA-DQA1,HLA-DQB1,CD138,CD38,VPREB3,IGLL5 | CD20,MS4A1 | Plasma B |
| T cells | Naive CD8+ T cells | CD8,CD2,CD3D,CD3E,CD3G,CD3Z,CD45RA,CD62L,CD27,CD127,FOXP3,CCR7,CD45,CD8A,CD8B,CCR6,CD11b,CD30,CD6,CTLA4,IL2RA,GZMB,PTPRC,SELL,CCR7,GNLY,Trac,Ltb,Cd52,Trbc2,Shisa5,Lck,Thy1,Dapl1 | CD25,CD44,CD69,HLA-DRA,CD95 | Naive CD8+ T |
| T cells | Naive CD4+ T cells | CD4,CD2,CD3D,CD3E,CD3G,CD3Z,CD45RA,CD62L,CD27,CD127,FOXP3,CCR7,CD45,CCR6,CD11b,CD30,CD6,CTLA4,IL2RA,GZMB,PTPRC,SELL,CCR7,Trac,Ltb,Cd52,Trbc2,Shisa5,Lck,Thy1,Dapl1 | CD25,CD44,CD69,HLA-DRA,CD95 | Naive CD4+ T |
| T cells | Memory CD8+ T cells | CD8,CD2,CD3D,CD3E,CD3G,CD3Z,CD25,CD45RA,CD62L,CD27,CD127,FOXP3,CCR7,CD45,CD8A,CD8B,CCR6,CD11b,CD30,CD45RO,CD6,CTLA4,IL2RA,GZMB,SELL,CCR7,GNLY,S100A4,Trac,Ltb,Cd52,Trbc2,Shisa5,Lck,Thy1,Dapl1 |  | Memory CD8+ T |
| T cells | Memory CD4+ T cells | CD4,CD2,CD3D,CD3E,CD3G,CD3Z,CD25,CD45RA,CD62L,CD27,CD127,FOXP3,CCR7,CD45,CCR6,CD11b,CD30,CD45RO,CD6,CTLA4,IL2RA,GZMB,SELL,CCR7,S100A4,Trac,Ltb,Cd52,Trbc2,Shisa5,Lck,Thy1,Dapl1 |  | Memory CD4+ T |
| T cells | Effector CD8+ T cells | CD8,CD2,CD3D,CD3E,CD3G,CD3Z,CD25,CD45RA,CD62L,CD27,CD127,FOXP3,CCR7,CD45,CD8A,CD8B,CCR6,CD11b,CD30,CD6,CTLA4,IL2RA,GZMB,PTPRC,GNLY,Trac,Ltb,Cd52,Trbc2,Shisa5,Lck,Thy1,Dapl1 | SELL,CCR7 | Effector CD8+ T |
| T cells | Effector CD4+ T cells | CD4,CD2,CD3D,CD3E,CD3G,CD3Z,CD25,CD45RA,CD62L,CD27,CD127,FOXP3,CCR7,CD45,CCR6,CD11b,CD30,CD6,CTLA4,IL2RA,GZMB,PTPRC,Trac,Ltb,Cd52,Trbc2,Shisa5,Lck,Thy1,Dapl1 | SELL,CCR7 | Effector CD4+ T |
| T cells | γδ-T cells | CD2,CD3D,CD3E,CD3G,CD3Z,CD25,CD45RA,CD62L,CD27,CD127,FOXP3,CCR7,CD45,CCR6,CD11b,CD30,CD6,CTLA4,IL2RA,GZMB,PTPRC,TRDV2,TRGV9,TRGC1,Trac,Ltb,Cd52,Trbc2,Shisa5,Lck,Thy1,Dapl1 | SELL,CCR7 | γδ-T |
| Platelets | Platelets | CD41,CD42b,CD61,CD31,PPBP,PF4,GNG11,SDPR,CLU,CD41,CD110 |  | Platelets |
| NKT cells | CD8+ NKT-like cells | CD8,CD56,CD2,CD16,CD94,CD3D,CD3E,CD3G,CD3Z,NKp46,CD11b,CD161,CD314,CD69,NKG7,CD122,NKG2D,GZMB,GZMA,GZMM,GNLY,COX6A2,ZMAT4,KIR2DL4 |  | CD8+ NKT |
| NKT cells | CD4+ NKT-like cells | CD4,CD56,CD2,CD16,CD94,CD3D,CD3E,CD3G,CD3Z,NKp46,CD11b,CD161,CD314,CD69,NKG7,CD122,NKG2D,GZMB,GZMA,GZMM,COX6A2,ZMAT4,KIR2DL4 |  | CD4+ NKT |
| NK cells | Natural killer cells | CD56,CD2,CD16,CD94,NKp46,CD11b,CD161,CD314,CD69,NKG7,CD122,NKG2D,GZMB,GZMA,GZMM,FCGR3A,GNLY,COX6A2,ZMAT4,KIR2DL4,NKG7 | CD3D,CD3E,CD3G,CD3Z,CD4,CD8 | NK |
| Eosinophils | Eosinophils | CD11b,CD193,CD123,CD125,CD15,SIGLEC8,CLC,GATA1,CEBPE,SEMG1,ALOX15,CCL23,PRSS41,PRSS33,THBS4,FOXI1 |  | Eosinophils |
| Neutrophils | Neutrophils | CD66b,CD11b,CD15,CD16,CXCL8,FCGR3B,MNDA,CXCR2,MPO,ELANE,PRTN3,MPO,AZU1,LYZ,S100A8,S100A9,PI3,CHI3L1,ANXA3,CXCL1,TGM3,BTNL3,C4BPA,MMP9,CD24,BPI,LTF,GCA,Camp,Ngp,Chil3,Ltf |  | Neutrophils |
| Basophils | Basophils | CD63,CD203c,CD123,CLC,MS4A3,TCN1,CPA3,HDC,GATA2,MS4A2,IL4,GCSAML,GATA2,TPSAB1 |  | Basophils |
| Mast cells | Mast cells | CD117,CD203c,CD25,KIT,SLC18A2,CD33,CD32,FCER1A,TPSD1,HPGDS |  | Mast |
| Monocytes | Classical Monocytes | CD14,CD11b,CD68,HLA-DR,CD33,CD11c,CD123,CD15,CD3D,CD3E,CD3G,CD3Z,CD66b,VCAN,S100A12,CXCL8,S100A8,S100A9,LYZ,CST3,Elane1 | CD56,CD16 | C_Monocytes |
| Monocytes | Non-classical monocytes | CD14,CD16,CD11b,CD68,HLA-DR,CD33,CD11c,CD123,CD15,CD3D,CD3E,CD3G,CD3Z,CD66b,FCGR3A,CDKN1C,LST1,FCER1G,MS4A7,RHOC,S100A8,S100A9,CST3,C1QC,Elane1 | CD56 | N_Monocytes |
| Monocytes | Intermediate monocytes | CD14,CD16,CD11b,CD68,HLA-DR,CD33,CD11c,CD123,CD15,CD3D,CD3E,CD3G,CD3Z,CD66b,IL1B,S100A8,S100A9,CST3,C1QC,Elane1 | CD56 | I_Monocytes |
| Macrophages | Macrophages | CD68,CD163,CD14,CD11b,CD206,CD80,CD86,CD16,CD64,CCL18,CD115,CD11c,CD32,HLA-DR,MRC1,MSR1,GCA,Pf4 | CD56 | MΦ |
| Megakaryocyte | Megakaryocyte | CD61,CD41,CD42b,CD41a,CD42a,CXCR4,CD110 |  | MKs |
| Endothelial | Endothelial | PECAM1,CD34,KDR,CDH5,PROM1,PDPN,TEK,FLT1,VCAM1,PTPRC,VWF,ENG,MCAM,ICAM1,FLT4,SELE |  | ECs |
| Erythroid-like and erythroid precursor cells | Erythroid-like and erythroid precursor cells | PTPRC,GYPA,RUVBL1,TFRC,FOLR1,CD36,ITGA4,HBB,CD235a,HBD,CA1 |  | Es |
| HSC/MPP cells | HSC/MPP cells | CD105,CD34,CD44,CD73,CD45,CD29,STRO-1,NANOG,SOX2,CD133,CD166,CD146,CD31,Nestin,OCT4,CD117,KDR,CXCL8,AVP,CRHBP,ALDH1A1,CD49,CD90,CD69,CD24,CD38,CD45RA,Keratin-19,ASPM,CD10,CD123,ABCG2,CD135,CD49f,EpCAM,Keratin-7,SCA-1,CD14,CD150,CD271,HLA-DR | PTPRC,CD38 | HSC/MPP |
| Progenitor cells | Progenitor cells | CD105,CD34,CD44,CD73,CD45,CD29,STRO-1,NANOG,SOX2,CD133,CD166,CD146,CD31,Nestin,OCT4,CD117,KDR,AVP,CRHBP,ALDH1A1,STMN1,CD38,PTPRC,CD135 |  | PCs |
| Myeloid Dendritic cells | Myeloid Dendritic cells | ITGAX,CD83,CD1C,NRP1,CLEC4C,CD86,IL3RA,CD80,CD1A,ITGAX,CD40,HLA-DQA1,CD11c,HLA-DR,HLA-DPB1,HLA-DPA1,CLEC10A,CST3,GPR31,ODF3L1,PRB2,CD207,ARSE,CLEC141,MRC,EBLN1,CRIP3 |  | mDCs |
| Plasmacytoid Dendritic cells | Plasmacytoid Dendritic cells | ITGAX,CD83,CD1C,NRP1,CLEC4C,CD86,IL3RA,CD80,CD1A,ITGAX,CD40,HLA-DQA1,CD11c,HLA-DR,HLA-DPB1,HLA-DPA1,CLEC10A,CST3,TPM2,LRRC26,ASIP,GPM6B,KRT5,NTM,SCT,SHD,KCNA5,SCARA5,EPHA2,MYMX |  | pDCs |
| Granulocytes | Granulocytes | CD203c,CD15,CD11b,CD63,CD66b,CD123,CD16,CD33,CD117,CD45,Fc-epsilon RI-alpha,CD125,CD13,CD14,CD25,CD44,CD69,CD9,HLA-DR,CCR3,CD116,CD11c,CD193,CD24,CD32,CD43,CXCL8,FCGR3B,MNDA,SIGLEC8,AZU1,MPO,CTSG,LYZ |  | Gs |
| ISG expressing immune cells | ISG expressing immune cells | IFIT1,IFIT2,IFIT3,IFIT5,ISG15,CCL3,CCL4,CCL3L3,RSAD2,OASL,CXCL10,IFI15,ISG20 |  | ISG+ |
| Kidney | Podocytes | PTPRQ, WT1, NTNG1, NPHS1, NPHS2, CLIC5, PODXL |  | PODs |
| Kidney | Parietal Epithelial Cells | CLDN1, VCAM1, CFH, RBFOX1, ALDH1A2 |  | PECs |
| Kidney | Proximal Tubule Cells | LRP2, CUBN, SLC13A1 |  | PTs |
| Kidney | Thin Limb Cells | CRYAB, TACSTD2, SLC44A5, KLRG2, COL26A1, BOC |  | TLs |
| Kidney | Thick Ascending Limb Cells | CASR, SLC12A1, UMOD |  | TALs |
| Kidney | Distal Convoluted Tubule Cells | SLC12A3, CNNM2, FGF13, KLHL3, LHX1, TRPM6 | CASR | DCTs |
| Kidney | Connecting Tubules | SLC8A1, SCN2A, HSD11B2, CALB1 | SLC12A3 | CNTs |
| Kidney | Principal Cells | GATA3, AQP2, AQP3 |  | PCs |
| Kidney | Intercalated Cells | ATP6V0D2, ATP6V1C2, TMEM213, CLNK |  | ICs |
| Kidney | Endothelial Cells | CD34, PECAM1, PTPRB, MEIS2, FLT1, EMCN |  | ECs |
| Kidney | Pericytes | NOTCH3, PDGFRB, ITGA8 |  | VSMs/Ps |
| Kidney | Fibroblasts | COL1A1, COL1A2, C7, NEGR1, FBLN5, DCN, CDH11 |  | FIBs |
| Kidney | Immune Cells | PTPRC |  | IMMs |
| Kidney | Schwann Cells / Neurals | CDH19, NRXN1, GINS3 |  | SCs/NEUs |
| Kidney PT | Proximal Tubule Epithelial Cell Segment 1 | SLC5A12, SLC13A3, SLC22A6, PRODH2, SLC5A2, SLC22A8 |  | PT-S1 |
| Kidney PT | Proximal Tubule Epithelial Cell Segment 2 | SLC5A12 , SLC13A3, SLC22A6, SLC34A1, SLC22A7 |  | PT-S2 |
| Kidney PT | Proximal Tubule Epithelial Cell Segment 3 | SLC22A7, MOGAT1, SLC5A11, SLC22A24, SLC7A13, SLC5A8, ABCC3, SATB2 |  | PT-S3 |
| Kidney TL | Descending Thin Limb Cell Type 2 | VCAM1, SLC39A8, AQP1, LRRC4C, LRP2, UNC5D, SATB2 | CLDN10 | DTL2 |
| Kidney TL | Descending Thin Limb Cell Type 1 | SATB2, JAG1, ADGRL3, ID1 | CLDN10, AQP1 | DTL1 |
| Kidney TL | Descending Thin Limb Cell Type 3 | CLDN1, AKR1B1, CLDN4, BCL6, SH3GL3, SLC14A2, SMOC2 | CLDN10, AQP2 | DTL3 |
| Kidney TL | Ascending Thin Limb Cell | CLDN1, AKR1B1, CLDN4, BCL6, SH3GL3, BCAS1, CLCNKA, CLDN10, PROX1 |  | ATL |
| Kidney TAL | Medullary Thick Ascending Limb Cell | NELL1, ESRRB, EGF, CLDN14, PROX1, MFSD4A, KCTD16, RAP1GAP, ANK2, CYFIP2 |  | M-TAL |
| Kidney TAL | Cortical Thick Ascending Limb Cell | NELL1, ESRRB, EGF, PPM1E, GP2, ENOX1, TMEM207, TMEM52B, CLDN16, WNK1 |  | C-TAL |
| Kidney TAL | Macula Densa Cell | NOS1, ROBO2, CALCR, PPFIA2, PAPPA2 | UMOD low | MD |
| Kidney DCT | Distal Convoluted Tubule Cell Type 1 | TRPM7, ADAMTS17, ITPKB, ZNF385D, HS6ST2 | SLC8A1 | DCT1 |
| Kidney DCT | Distal Convoluted Tubule Cell Type 2 | TRPV5, SLC8A1, SCN2A, HSD11B2, CALB1 | SLC12A3 | DCT2 |
| Kidney CNT | Connecting Tubule Cell | KITLG, PCDH7 |  | CNT |
| Kidney CNT | Connecting Tubule Principal Cell | RALYL, TOX, SGPP1, SCNN1G, SCNN1B, KCNIP1 |  | CNT-PC |
| Kidney PC | Cortical Collecting Duct Principal Cell | SCNN1G, SCNN1B, FXYD4, SOX5, PDE10A, SLC25A29, ST6GAL1, PAPPA |  | CCD-PC |
| Kidney PC | Outer Medullary Collecting Duct Principal Cell | SCNN1G, SCNN1B, FXYD4, SOX5, SYK, FAM81A, PROM1, KCNK13 |  | OMCD-PC |
| Kidney PC | Inner Medullary Collecting Duct Cell | FXYD4, SOX5, PHACTR1, PCDH7, SLC14A2, HS3ST5 |  | IMCD |
| Kidney PC | Papillary Epithelial Cells | TACSTD2, TP63, GPX2, FXYD3, KRT5 |  | PapE |
| Kidney IC | Cortical Collecting Duct Intercalated Cell Type A | SLC4A1, SLC26A7, HS6ST3, NXPH2, LEF1, ADGRF5 | CALCA | CCD-IC-A |
| Kidney IC | Connecting Tubule Intercalated Cell Type A | SLC4A1, SLC26A7, SLC8A1, SCN2A, CALB1 |  | CNT-IC-A |
| Kidney IC | Outer Medullary Collecting Duct Intercalated Cell Type A | SLC4A1, SLC26A7, KIT, AQP6, STAP1, FAM184B, CALCA |  | OMCD-IC-A |
| Kidney IC | Intercalated Beta Cell | SLC4A9, SLC35F3, SLC26A4, INSRR, TLDC2 | KIT, SLC4A1, CALCA | IC-B |
| Kidney EC | Glomerular Capillary Endothelial Cell | EMCN, HECW2, PLAT, ITGA8, EHD3, KDR, SOST | NR2F2 | EC-GC |
| Kidney EC | Afferent / Efferent Arteriole Endothelial Cell | BTNL9, ADAMTS6, PALMD, AQP1, TM4SF1, VEGFC, CCDC3, CDH5, SERPINE2, FBLN5, CXCL12, SOX17 | NR2F2, SOST | EC-AEA |
| Kidney EC | Descending Vasa Recta Endothelial Cell | BTNL9, ADAMTS6, PALMD, AQP1, TM4SF1, MCTP1, SLC14A1, ENPP2, LYPD6B | NR2F2, IGFBP5, KDR, SOST | EC-DVR |
| Kidney EC | Peritubular Capilary Endothelial Cell | CEACAM1, DNASE1L3, PLVAP, PITPNC1, GRB10, SLCO2A1, RAPGEF4 | NR2F2, SOST | EC-PTC |
| Kidney EC | Ascending Vasa Recta Endothelial Cell | CEACAM1, DNASE1L3, PLVAP, GPM6A, EDIL3, TLL1, ZNF385D, NR2F2 | PALMD, BTNL9, SLC14A1, SOST | EC-AVR |
| Kidney EC | Lymphatic Cell | MMRN1, CD36, TBX1, PKHD1L1, PROX1 |  | EC-LYM |
| Kidney P | Mesangial Cell | PIP5K1B, ROBO1, PIEZO2, DAAM2, PHTF2, GATA3, POSTN |  | MC |
| Kidney P | Renin-positive Juxtaglomerular Granular Cell | PIP5K1B, ROBO1, REN, PDE10A, ABCC8, COL13A1, GRID2 |  | REN |
| Kidney P | Vascular Smooth Muscle Cell | NTRK3, MYH11, RGS6, ADRA1A, LDB3, MCAM |  | VSMC |
| Kidney P | Vascular Smooth Muscle Cell / Pericyte | NTRK3, CCDC102B, RGS5, ABCC9, ADCY3, ADGRB3 |  | VSMC/P |
| Kidney FIB | Fibroblast | LAMA2, GGT5, LUM, AEBP1, C1S, SFRP1, MEG3, CXCL12 |  | FIB |
| Kidney FIB | Medullary Fibroblast | SYT1, TNC, PLCXD3, GABRG3, GREB1L, KCNK2 |  | M-FIB |
| Kidney FIB | Medullary Fibroblast | SYT1, TNC, ADAMTSL1, CLMP, NCAM1, FREM1 |  | M-FIB |
| Kidney FIB | Medullary Fibroblast | SYT1, TNC, IGFBP5, MGP, BGN, IGFBP2 |  | M-FIB |
| Kidney FIB | Myofibroblast | SYNPO2, PCDH7, KCNMA1, LMOD1, TTLL7, DTNA, COL14A1 |  | MYOF |
| Kidney FIB | Myofibroblast | LAMA2, COL16A1, SULF1, COL6A3, NTM, GLI2, COL5A1, FN1, |  | MYOF |
| Kidney FIB | Myofibroblast | COL16A1, SULF1, SLC24A3, CDH13, SMOC2, ANO3, RXFP1 |  | MYOF |
| Kidney IMM | B Cell | BANK1, BLK, MS4A1, BACH2 |  | B |
| Kidney IMM | Plasma Cell | IGKC, TENT5C, MZB1, FCRL5, CD38, JCHAIN |  | PL |
| Kidney IMM | T Cell | CD96, CD247, THEMIS, BCL11B, CAMK4, IL7R |  | T |
| Kidney IMM | Natural Killer T Cell | CD96, CD247, RUNX3, GNLY, NKG7, CCL5, KLRF1, CCL4, GZMA |  | NKT |
| Kidney IMM | Mast Cell | MS4A2, CPA3, KIT | IL3RA | MAST |
| Kidney IMM | M2 Macrophage | F13A1, MRC1, CD163, STAB1, SLC1A3, CD14, FOLR2 | CLEC9A | MAC-M2 |
| Kidney IMM | Monocyte-derived Cell | MSR1, ITGAX, HLA-DQA1, HLA_DRB1, CSF2RA, CD14, TRPM2 | CLEC9A | MDC |
| Kidney IMM | Classical Dendritic Cell | ITGAX, HLA-DQA1, HLA-DRA, CSF2RA, CIITA, WDFY4, FLT3, ZNF366, CADM1, ZBTB46, CLEC9A | CD14, CD163 | cDC |
| Kidney IMM | Plasmacytoid Dendritic Cell | IRF8, CUX2, P2RY14, IL3RA, CLEC4C | CD14, CD163, CLEC9A | pDC |
| Kidney IMM | Non-Classical Monocyte | CTSS, IRAK3, TCF7L2, TNFRSF1B, FCN1, HLA-DRA, FCGR3A | CD163, CLEC9A, MSR1 | ncMON |
| Kidney IMM | Neutrophil | S100A9, S100A8, IFITM2, FCGR3B, CD1C |  | N |
| Note: B cells,T cells, Platelets, NKT cells, Eosinophils, Neutrophils, Basophils, Mast cells, Monocytes, Macrophages, Megakaryocyte, Endothelial, Erythroid-like and erythroid precursor cells, HSC/MPP cells, Progenitor cells, Myeloid Dendritic cells, Plasmacytoid Dendritic cells, Granulocytes, ISG expressing immune cellsannotations are derived from https://raw.githubusercontent.com/IanevskiAleksandr/sc-type/master/ScTypeDB_full.xlsx, while the rest are from GSE211785. | | | | |
