# Supplementary material for: Aging-related CD8 + T cell alterations and calcium/calmodulin dependent protein kinase 1D activation in the pathogenesis of diabetic kidney disease
Source: PeerJ journal article supplement (doi:10.7717/peerj.20762), 2026-02-13
Supplement: Supplementary_table_3.docx [file Supplementary_table_3.docx]

| Sample ID | Sex | Age  (year) | Pathological stage | eGFR (mL/min/1.73m²) | UACR (mg/g) | HbA1c (%) |
| --- | --- | --- | --- | --- | --- | --- |
|
| 1 | male | 31 | II | 96 | 205 | 9.4 |
| 2 | female | 59 | III | 95 | 2624 | 7.3 |
| 3 | female | 56 | IV | 32 | 1298 | 8.3 |

**Supplementary table 3** Patient information of clinical tissue samples.
