# Supplementary material for: Aging-related CD8 + T cell alterations and calcium/calmodulin dependent protein kinase 1D activation in the pathogenesis of diabetic kidney disease
Source: PeerJ journal article supplement (doi:10.7717/peerj.20762), 2026-02-13
Supplement: Supplementary_table_4.docx [file Supplementary_table_4.docx]

**Supplementary table 4** sc-RNA seq of DEGs in CD8+T cell compared to other cell clusters

| 1 | CREM |
| --- | --- |
| 2 | NR4A2 |
| 3 | SIK3 |
| 4 | RALGAPA1 |
| 5 | STAT4 |
| 6 | RGCC |
| 7 | ZNF331 |
| 8 | LMNA |
| 9 | GZMH |
| 10 | DENND4A |
| 11 | EZR |
| 12 | ZFP36 |
| 13 | BRAF |
| 14 | YPEL5 |
| 15 | ATP1B3 |
| 16 | SELENOK |
| 17 | FYN |
| 18 | MYADM |
| 19 | SIK2 |
| 20 | EML4 |
| 21 | ELL2 |
| 22 | CDK17 |
| 23 | NFE2L3 |
| 24 | PDE3B |
| 25 | UBR1 |
| 26 | FAAH2 |
| 27 | RNF125 |
| 28 | PDE4B |
| 29 | ZSWIM6 |
| 30 | CCDC138 |
| 31 | ZNF165 |
| 32 | KMT2E |
| 33 | FAM177A1 |
| 34 | ZHX2 |
| 35 | CCR7 |
| 36 | CSRNP1 |
| 37 | HCG17 |
| 38 | NFKB1 |
| 39 | CHD1 |
| 40 | TIPARP |
| 41 | KDM6B |
| 42 | BACH2 |
| 43 | CCDC97 |
| 44 | NR3C1 |
| 45 | AL121944.1 |
| 46 | PGAP1 |
| 47 | GNG2 |
| 48 | REL |
| 49 | RASA1 |
| 50 | NAF1 |
| 51 | SPDYA |
| 52 | EIF4A3 |
| 53 | DNAJB9 |
| 54 | ARID4B |
| 55 | TUBA1A |
| 56 | CD55 |
| 57 | SKIL |
| 58 | ANKHD1 |
| 59 | RLF |
| 60 | ARIH1 |
| 61 | SEMA4A |
| 62 | RABGEF1 |
| 63 | NR4A3 |
| 64 | LINC01619 |
| 65 | TGFB1 |
| 66 | VPS37B |
| 67 | JMY |
| 68 | AHI1 |
| 69 | AL049869.3 |
| 70 | CATSPERB |
| 71 | CHMP1B |
| 72 | AC067945.4 |
| 73 | LINC00513 |
| 74 | AC092338.3 |
| 75 | HCG18 |
| 76 | AGPAT4 |
| 77 | BTBD9 |
| 78 | ZNF10 |
| 79 | P2RY8 |
| 80 | HERC1 |
| 81 | ZBTB1 |
| 82 | PPP1CB |
| 83 | RCOR1 |
| 84 | RNF168 |
| 85 | LDLRAD4 |
| 86 | PTPN22 |
| 87 | TWISTNB |
| 88 | ZFY |
| 89 | NEK1 |
| 90 | BTBD11 |
| 91 | FBXO11 |
| 92 | CES1 |
| 93 | USP36 |
| 94 | SENP5 |
| 95 | FAM160A1 |
| 96 | ARHGAP10 |
| 97 | BICDL1 |
| 98 | C16orf54 |
| 99 | PDE4A |
| 100 | CLASP2 |
| 101 | SLC24A1 |
| 102 | AF228727.1 |
| 103 | ADK |
| 104 | AC007216.4 |
| 105 | KAT6A |
| 106 | ARHGAP26-AS1 |
| 107 | BCL3 |
| 108 | GSPT1 |
| 109 | AC073167.1 |
| 110 | SERPINE3 |
| 111 | ADAMTSL4-AS1 |
| 112 | MAPK8 |
| 113 | AC026202.2 |
| 114 | TRPC4AP |
| 115 | RANBP2 |
| 116 | NFATC1 |
| 117 | ALG13 |
| 118 | AC104806.2 |
| 119 | NUP98 |
| 120 | ADAMTS17 |
| 121 | ZNF410 |
| 122 | GPHN |
| 123 | GRAMD1B |
| 124 | CCDC173 |
| 125 | AVPI1 |
| 126 | BTD |
| 127 | TENT4B |
| 128 | AC016831.7 |
| 129 | PPP4R3A |
| 130 | TBC1D32 |
| 131 | MTHFD2 |
| 132 | DDIT3 |
| 133 | SOCS3 |
| 134 | RNF139 |
| 135 | AL109935.1 |
| 136 | CMSS1 |
| 137 | RFTN1 |
| 138 | RFX3 |
| 139 | RRP12 |
| 140 | TRAV6 |
| 141 | TRAF3 |
| 142 | SCLT1 |
| 143 | UBE2O |
| 144 | FAM222A-AS1 |
| 145 | CAMK1D |
| 146 | STAG1 |
| 147 | ZDBF2 |
| 148 | RCAN3AS |
| 149 | CD6 |
| 150 | TSC22D2 |
| 151 | RELB |
| 152 | PCBP3 |
| 153 | AC005070.3 |
| 154 | S100B |
| 155 | ATP9B |
| 156 | MLF1 |
| 157 | USP37 |
| 158 | KPNA2 |
| 159 | AC017002.5 |
| 160 | AC099489.1 |
| 161 | HOMER1 |
| 162 | NETO2 |
| 163 | WHRN |
| 164 | ETV3 |
| 165 | AC009831.3 |
| 166 | TBC1D19 |
| 167 | AL021707.1 |
| 168 | AC068282.1 |
| 169 | AC079781.5 |
| 170 | PLAA |
| 171 | FAM169A |
| 172 | AKNA |
| 173 | AC092652.2 |
| 174 | FAM102B |
| 175 | BIK |
| 176 | STX17-AS1 |
| 177 | S1PR2 |
| 178 | JMJD6 |
| 179 | DUSP16 |
| 180 | AL031602.2 |
| 181 | LONRF3 |
| 182 | PHLDB3 |
| 183 | AMBRA1 |
| 184 | DNAAF2 |
| 185 | GBF1 |
| 186 | ICOS |
| 187 | GTF2B |
| 188 | VAV1 |
| 189 | AL157938.2 |
| 190 | MACO1 |
| 191 | DCAF10 |
| 192 | CEP19 |
| 193 | SLC26A5 |
| 194 | PAXBP1-AS1 |
| 195 | ZNF540 |
| 196 | HHAT |
| 197 | WDR37 |
| 198 | SLC7A1 |
| 199 | AC008105.3 |
| 200 | AC024560.5 |
| 201 | WDR47 |
| 202 | IQCB1 |
| 203 | ANKRD13C |
| 204 | AL031772.1 |
| 205 | AP000787.1 |
| 206 | TMEM184C |
| 207 | TAF4B |
| 208 | A2M-AS1 |
| 209 | NXT1 |
| 210 | AC016866.2 |
| 211 | GTPBP1 |
| 212 | UTY |
| 213 | FBXL2 |
| 214 | TTC21A |
| 215 | AC025165.2 |
| 216 | TBC1D22A |
| 217 | AL645465.1 |
| 218 | LINC02649 |
| 219 | GPCPD1 |
| 220 | AL035634.1 |
| 221 | CEP83 |
| 222 | SENP2 |
| 223 | AP002387.2 |
| 224 | NAA35 |
| 225 | AL157402.2 |
| 226 | PPP2R3C |
| 227 | USP49 |
| 228 | GFPT1 |
| 229 | GALNT10 |
| 230 | ZBTB20-AS5 |
| 231 | IP6K1 |
| 232 | AC008875.3 |
| 233 | ANKRD23 |
| 234 | SIDT1-AS1 |
| 235 | AP003086.1 |
| 236 | NCMAP-DT |
| 237 | AP005131.5 |
| 238 | GLI1 |
| 239 | PROK2 |
| 240 | AL360270.1 |
| 241 | AC073343.2 |
| 242 | TMEM67 |
| 243 | DOCK3 |
| 244 | AC090772.2 |
| 245 | IL21R |
| 246 | RHD |
| 247 | MARS |
| 248 | AP3M2 |
| 249 | FASTKD1 |
| 250 | SGO1-AS1 |
| 251 | ZFYVE28 |
| 252 | ZNF75D |
| 253 | OASL |
| 254 | AL109811.1 |
| 255 | INTS4 |
| 256 | AC104695.2 |
| 257 | SPAG1 |
| 258 | QPCTL |
| 259 | LINC01237 |
| 260 | KIAA1324L |
| 261 | AL606489.1 |
| 262 | LINC00893 |
| 263 | ZSWIM5 |
| 264 | AUTS2 |
| 265 | ZFY-AS1 |
| 266 | SMC1B |
| 267 | RGPD2 |
| 268 | FAM222A |
| 269 | AC091153.2 |
| 270 | AC092683.1 |
| 271 | RNF213-AS1 |
| 272 | CHN1 |
| 273 | AC017101.1 |
| 274 | PAK3 |
| 275 | LMBR1 |
| 276 | NBPF26 |
| 277 | LINC01891 |
| 278 | ZNF451-AS1 |
| 279 | TRAV4 |
| 280 | GDF11 |
| 281 | SNHG31 |
| 282 | AL158801.3 |
| 283 | RRM1 |
| 284 | SNX25 |
| 285 | ZFP30 |
| 286 | KMT5C |
| 287 | WARS2 |
| 288 | SCFD2 |
| 289 | AL645728.1 |
| 290 | DCP1A |
| 291 | ZNF589 |
| 292 | AC018797.3 |
| 293 | ZPR1 |
| 294 | SLC7A5 |
| 295 | KLHL25 |
| 296 | AL138787.2 |
| 297 | GCNA |
| 298 | MTFR1 |
| 299 | AC011379.1 |
| 300 | TSHZ2 |
| 301 | ARID5A |
| 302 | AL133480.1 |
| 303 | BRMS1L |
| 304 | AL513327.1 |
| 305 | ZC3H12D |
| 306 | PZP |
| 307 | AC008549.2 |
| 308 | SARM1 |
| 309 | CHODL |
| 310 | SLC41A2 |
| 311 | ZNF335 |
| 312 | ZNF267 |
| 313 | SF3A1 |
| 314 | YARS |
| 315 | AC009404.1 |
| 316 | TGIF2 |
| 317 | C12orf60 |
| 318 | AC098829.1 |
| 319 | AC022893.1 |
| 320 | SLAIN1 |
| 321 | JAKMIP1 |
| 322 | CCDC184 |
| 323 | SLC35D1 |
| 324 | LHFPL5 |
| 325 | FAM83D |
| 326 | AP000442.1 |
| 327 | MASTL |
| 328 | RINT1 |
| 329 | HIC1 |
| 330 | CDRT4 |
| 331 | DIAPH2-AS1 |
| 332 | AL137009.1 |
| 333 | ZNF569 |
| 334 | AL731577.2 |
| 335 | KIZ-AS1 |
| 336 | AC026979.4 |
| 337 | GPR35 |
| 338 | CACNA2D2 |
| 339 | SLC1A4 |
| 340 | SP4 |
| 341 | TSEN54 |
| 342 | AC007216.3 |
| 343 | ZNF551 |
| 344 | RADX |
| 345 | NKD1 |
| 346 | SLC5A6 |
| 347 | TTC16 |
| 348 | AP000763.3 |
| 349 | PSMD6-AS2 |
| 350 | CCDC157 |
| 351 | RAD52 |
| 352 | GREM2 |
| 353 | AC107223.1 |
| 354 | PARD6A |
| 355 | DHCR7 |
| 356 | ZNF222 |
| 357 | AL353660.1 |
| 358 | B4GALNT3 |
| 359 | NUGGC |
| 360 | SPAG4 |
| 361 | AC008764.8 |
| 362 | BUD13 |
| 363 | WDR86 |
| 364 | PKIA |
| 365 | ZBTB2 |
| 366 | LYPD3 |
| 367 | YRDC |
