# Supplementary material for: Aging-related CD8 + T cell alterations and calcium/calmodulin dependent protein kinase 1D activation in the pathogenesis of diabetic kidney disease
Source: PeerJ journal article supplement (doi:10.7717/peerj.20762), 2026-02-13
Supplement: Supplementary_table_5.docx [file Supplementary_table_5.docx]

**Supplementary table 5** Exposure data

|  | beta.exposure | pos.exposure | chr.exposure | samplesize.exposure | se.exposure | pval.exposure | id.exposure | SNP | effect_allele.exposure | other_allele.exposure | eaf.exposure | mr_keep.exposure | pval_origin.exposure | data_source.exposure | F_statistics | ENSEMBL | exposure |
| --- | --- | --- | --- | --- | --- | --- | --- | --- | --- | --- | --- | --- | --- | --- | --- | --- | --- |
| 1 | -0.309463 | 1056030 | 12 | 26395 | 0.014845 | 1.65E-96 | eqtl-a-ENSG00000002016 | rs12822733 | G | C | 0.193308 | TRUE | reported | igd | 434.534387 | ENSG00000002016 | RAD52 |
| 2 | 0.349005 | 26717268 | 17 | 26494 | 0.0115355 | 1.00E-200 | eqtl-a-ENSG00000004139 | rs4794828 | A | G | 0.50251 | TRUE | reported | igd | 915.287782 | ENSG00000004139 | SARM1 |
| 3 | 0.103463 | 104638501 | 7 | 25648 | 0.017337 | 2.40E-09 | eqtl-a-ENSG00000005483 | rs10264718 | C | A | 0.136073 | TRUE | reported | igd | 35.6113443 | ENSG00000005483 | KMT2E |
| 4 | -0.212532 | 50474624 | 3 | 31564 | 0.0190959 | 8.98E-29 | eqtl-a-ENSG00000007402 | rs62260815 | A | G | 0.10795 | TRUE | reported | igd | 123.862795 | ENSG00000007402 | CACNA2D2 |
| 5 | -0.144223 | 112098264 | 6 | 31565 | 0.0118545 | 4.70E-34 | eqtl-a-ENSG00000010810 | rs1474466 | G | A | 0.47667 | TRUE | reported | igd | 148.004544 | ENSG00000010810 | FYN |
| 6 | -0.103944 | 112055276 | 6 | 31184 | 0.0144213 | 5.69E-13 | eqtl-a-ENSG00000010810 | rs1067141 | C | T | 0.21663 | TRUE | reported | igd | 51.9472036 | ENSG00000010810 | FYN |
| 7 | 0.0716818 | 16444697 | 19 | 14710 | 0.0121119 | 3.25E-09 | eqtl-a-ENSG00000010810 | rs10423726 | A | C | 0.595533 | TRUE | reported | igd | 35.0214562 | ENSG00000010810 | FYN |
| 8 | -0.148794 | 46206262 | 19 | 30935 | 0.0128763 | 6.92E-31 | eqtl-a-ENSG00000011478 | rs17850756 | A | G | 0.304164 | TRUE | reported | igd | 133.524385 | ENSG00000011478 | QPCTL |
| 9 | 0.112764 | 114303808 | 1 | 29781 | 0.0192282 | 4.51E-09 | eqtl-a-ENSG00000013725 | rs6679677 | A | C | 0.107034 | TRUE | reported | igd | 34.3901854 | ENSG00000013725 | CD6 |
| 10 | 0.119649 | 25488819 | 2 | 31684 | 0.0131679 | 1.02E-19 | eqtl-a-ENSG00000013725 | rs7578575 | A | T | 0.283449 | TRUE | reported | igd | 82.5577203 | ENSG00000013725 | CD6 |
| 11 | -0.0898395 | 90976768 | 6 | 29113 | 0.0162939 | 3.51E-08 | eqtl-a-ENSG00000013725 | rs72928038 | A | G | 0.158151 | TRUE | reported | igd | 30.3986798 | ENSG00000013725 | CD6 |
| 12 | -0.111135 | 32573471 | 6 | 24117 | 0.0126042 | 1.17E-18 | eqtl-a-ENSG00000013725 | rs9270965 | G | A | 0.668066 | TRUE | reported | igd | 77.7383143 | ENSG00000013725 | CD6 |
| 13 | -0.156928 | 60789643 | 11 | 31563 | 0.0125247 | 5.14E-36 | eqtl-a-ENSG00000013725 | rs55753183 | C | A | 0.3367 | TRUE | reported | igd | 156.977965 | ENSG00000013725 | CD6 |
| 14 | -0.362353 | 60793330 | 11 | 31355 | 0.0119724 | 1.00E-200 | eqtl-a-ENSG00000013725 | rs34383631 | T | C | 0.366096 | TRUE | reported | igd | 915.953831 | ENSG00000013725 | CD6 |
| 15 | 0.102292 | 60859624 | 11 | 31231 | 0.0122968 | 8.89E-17 | eqtl-a-ENSG00000013725 | rs477537 | C | A | 0.629913 | TRUE | reported | igd | 69.1944574 | ENSG00000013725 | CD6 |
| 16 | -0.262953 | 123297570 | 11 | 25738 | 0.0157749 | 2.20E-62 | eqtl-a-ENSG00000023171 | rs10893036 | A | G | 0.167737 | TRUE | reported | igd | 277.836489 | ENSG00000023171 | GRAMD1B |
| 17 | 0.311765 | 123330774 | 11 | 25751 | 0.0148475 | 6.90E-98 | eqtl-a-ENSG00000023171 | rs55837399 | T | A | 0.193113 | TRUE | reported | igd | 440.873826 | ENSG00000023171 | GRAMD1B |
| 18 | 0.298945 | 123355391 | 11 | 26079 | 0.0145061 | 2.32E-94 | eqtl-a-ENSG00000023171 | rs35923643 | G | A | 0.20576 | TRUE | reported | igd | 424.666445 | ENSG00000023171 | GRAMD1B |
| 19 | 0.176336 | 123280309 | 11 | 26196 | 0.0195633 | 2.00E-19 | eqtl-a-ENSG00000023171 | rs2282561 | T | C | 0.10254 | TRUE | reported | igd | 81.2390024 | ENSG00000023171 | GRAMD1B |
| 20 | 0.0995796 | 182323766 | 2 | 31569 | 0.0119763 | 9.19E-17 | eqtl-a-ENSG00000026652 | rs1375493 | A | G | 0.565077 | TRUE | reported | igd | 69.130215 | ENSG00000026652 | AGPAT4 |
| 21 | -0.247765 | 161657657 | 6 | 28527 | 0.0394845 | 3.49E-10 | eqtl-a-ENSG00000026652 | rs112049074 | T | C | 0.0231963 | TRUE | reported | igd | 39.3727889 | ENSG00000026652 | AGPAT4 |
| 22 | 0.153369 | 161694612 | 6 | 30817 | 0.0170769 | 2.68E-19 | eqtl-a-ENSG00000026652 | rs6914451 | G | C | 0.140529 | TRUE | reported | igd | 80.6545579 | ENSG00000026652 | AGPAT4 |
| 23 | 0.258135 | 161566909 | 6 | 31684 | 0.0172504 | 1.26E-50 | eqtl-a-ENSG00000026652 | rs6455707 | C | T | 0.135556 | TRUE | reported | igd | 223.907186 | ENSG00000026652 | AGPAT4 |
| 24 | -0.110896 | 127009395 | 9 | 31569 | 0.0158231 | 2.41E-12 | eqtl-a-ENSG00000026652 | rs55793580 | T | C | 0.169838 | TRUE | reported | igd | 49.1157865 | ENSG00000026652 | AGPAT4 |
| 25 | 0.0824988 | 111904371 | 12 | 28417 | 0.0119063 | 4.24E-12 | eqtl-a-ENSG00000026652 | rs4766578 | A | T | 0.531061 | TRUE | reported | igd | 48.007717 | ENSG00000026652 | AGPAT4 |
| 26 | 0.146469 | 144385777 | 6 | 25521 | 0.0266292 | 3.79E-08 | eqtl-a-ENSG00000047056 | rs149110519 | T | C | 0.0526158 | TRUE | reported | igd | 30.2510991 | ENSG00000047056 | WDR37 |
| 27 | -0.206711 | 1156165 | 10 | 31086 | 0.0224186 | 2.96E-20 | eqtl-a-ENSG00000047056 | rs10794720 | C | T | 0.924194 | TRUE | reported | igd | 85.0123961 | ENSG00000047056 | WDR37 |
| 28 | 0.645248 | 1096932 | 10 | 31141 | 0.0366664 | 2.56E-69 | eqtl-a-ENSG00000047056 | rs7100196 | A | G | 0.026484 | TRUE | reported | igd | 309.662701 | ENSG00000047056 | WDR37 |
| 29 | -0.145749 | 1196692 | 10 | 29907 | 0.0233453 | 4.29E-10 | eqtl-a-ENSG00000047056 | rs57148007 | T | C | 0.0696718 | TRUE | reported | igd | 38.9747381 | ENSG00000047056 | WDR37 |
| 30 | 0.166959 | 25979561 | 7 | 10333 | 0.0294108 | 1.37E-08 | eqtl-a-ENSG00000050344 | rs146154536 | C | T | 0.0426805 | TRUE | reported | igd | 32.2197322 | ENSG00000050344 | NFE2L3 |
| 31 | -0.53013 | 26135404 | 7 | 14257 | 0.0139676 | 1.00E-200 | eqtl-a-ENSG00000050344 | rs35257100 | T | C | 0.208035 | TRUE | reported | igd | 1440.3242 | ENSG00000050344 | NFE2L3 |
| 32 | -0.108246 | 25908952 | 7 | 14263 | 0.0158618 | 8.83E-12 | eqtl-a-ENSG00000050344 | rs6960950 | G | T | 0.168836 | TRUE | reported | igd | 46.564814 | ENSG00000050344 | NFE2L3 |
| 33 | 0.0877149 | 85806068 | 2 | 31569 | 0.012042 | 3.24E-13 | eqtl-a-ENSG00000052749 | rs3731827 | C | T | 0.418566 | TRUE | reported | igd | 53.0544705 | ENSG00000052749 | RRP12 |
| 34 | 0.098869 | 148200011 | 5 | 31569 | 0.0120385 | 2.16E-16 | eqtl-a-ENSG00000052749 | rs56330463 | C | T | 0.582097 | TRUE | reported | igd | 67.444729 | ENSG00000052749 | RRP12 |
| 35 | 0.0845093 | 173205318 | 5 | 31569 | 0.0137202 | 7.29E-10 | eqtl-a-ENSG00000052749 | rs2594836 | A | G | 0.749651 | TRUE | reported | igd | 37.9367925 | ENSG00000052749 | RRP12 |
| 36 | 0.768218 | 99071485 | 10 | 31569 | 0.0241644 | 1.00E-200 | eqtl-a-ENSG00000052749 | rs12360528 | A | G | 0.0602401 | TRUE | reported | igd | 1010.62354 | ENSG00000052749 | RRP12 |
| 37 | 0.902942 | 99300893 | 10 | 26812 | 0.0414786 | 4.58E-105 | eqtl-a-ENSG00000052749 | rs74433050 | G | A | 0.020334 | TRUE | reported | igd | 473.848089 | ENSG00000052749 | RRP12 |
| 38 | -0.232789 | 98751438 | 10 | 28614 | 0.0256939 | 1.30E-19 | eqtl-a-ENSG00000052749 | rs74529649 | G | A | 0.0565445 | TRUE | reported | igd | 82.0794606 | ENSG00000052749 | RRP12 |
| 39 | 0.294865 | 98716653 | 10 | 16598 | 0.0533364 | 3.24E-08 | eqtl-a-ENSG00000052749 | rs61858089 | C | T | 0.0125835 | TRUE | reported | igd | 30.5595334 | ENSG00000052749 | RRP12 |
| 40 | -0.563005 | 98958034 | 10 | 31684 | 0.0109381 | 1.00E-200 | eqtl-a-ENSG00000052749 | rs701808 | A | G | 0.526701 | TRUE | reported | igd | 2649.19124 | ENSG00000052749 | RRP12 |
| 41 | 0.0888671 | 111884608 | 12 | 28418 | 0.0119224 | 9.08E-14 | eqtl-a-ENSG00000052749 | rs3184504 | C | T | 0.542056 | TRUE | reported | igd | 55.5551179 | ENSG00000052749 | RRP12 |
| 42 | 0.0658905 | 16170764 | 17 | 31569 | 0.0118983 | 3.06E-08 | eqtl-a-ENSG00000052749 | rs7210990 | A | C | 0.481977 | TRUE | reported | igd | 30.6653737 | ENSG00000052749 | RRP12 |
| 43 | 0.182819 | 235397022 | 1 | 31569 | 0.0189691 | 5.55E-22 | eqtl-a-ENSG00000054267 | rs72756074 | G | A | 0.109874 | TRUE | reported | igd | 92.8798898 | ENSG00000054267 | ARID4B |
| 44 | 0.221652 | 210502184 | 1 | 30817 | 0.0164104 | 1.43E-41 | eqtl-a-ENSG00000054392 | rs12143851 | T | G | 0.153387 | TRUE | reported | igd | 182.421822 | ENSG00000054392 | HHAT |
| 45 | 0.0713418 | 210696472 | 1 | 30406 | 0.0123519 | 7.65E-09 | eqtl-a-ENSG00000054392 | rs12117360 | G | A | 0.635526 | TRUE | reported | igd | 33.357387 | ENSG00000054392 | HHAT |
| 46 | 0.165854 | 47203834 | 22 | 26080 | 0.012056 | 4.62E-43 | eqtl-a-ENSG00000054611 | rs801651 | A | G | 0.597516 | TRUE | reported | igd | 189.239641 | ENSG00000054611 | TBC1D22A |
| 47 | 0.234828 | 47427875 | 22 | 26078 | 0.013691 | 6.07E-66 | eqtl-a-ENSG00000054611 | rs131952 | G | C | 0.245291 | TRUE | reported | igd | 294.168461 | ENSG00000054611 | TBC1D22A |
| 48 | 0.452203 | 76652181 | 17 | 30803 | 0.0119252 | 1.00E-200 | eqtl-a-ENSG00000055483 | rs7209655 | T | C | 0.345278 | TRUE | reported | igd | 1437.82932 | ENSG00000055483 | USP36 |
| 49 | 0.213056 | 77002142 | 17 | 22926 | 0.020109 | 3.14E-26 | eqtl-a-ENSG00000055483 | rs67046441 | C | A | 0.096156 | TRUE | reported | igd | 112.245439 | ENSG00000055483 | USP36 |
| 50 | 0.265381 | 76663599 | 17 | 20921 | 0.0345228 | 1.51E-14 | eqtl-a-ENSG00000055483 | rs60865878 | T | G | 0.03053 | TRUE | reported | igd | 59.0862066 | ENSG00000055483 | USP36 |
| 51 | -0.853047 | 76747208 | 17 | 25631 | 0.0309335 | 2.11E-167 | eqtl-a-ENSG00000055483 | rs117781742 | T | G | 0.0364561 | TRUE | reported | igd | 760.42066 | ENSG00000055483 | USP36 |
| 52 | -0.122117 | 96704979 | 12 | 31181 | 0.0140288 | 3.18E-18 | eqtl-a-ENSG00000059758 | rs3759366 | A | C | 0.233598 | TRUE | reported | igd | 75.7675682 | ENSG00000059758 | CDK17 |
| 53 | -0.10098 | 74337715 | 2 | 31468 | 0.0160797 | 3.38E-10 | eqtl-a-ENSG00000065911 | rs12465641 | A | G | 0.163284 | TRUE | reported | igd | 39.4354904 | ENSG00000065911 | MTHFD2 |
| 54 | -0.253436 | 74402277 | 2 | 31353 | 0.0117431 | 2.67E-103 | eqtl-a-ENSG00000065911 | rs1667600 | T | C | 0.536464 | TRUE | reported | igd | 465.739838 | ENSG00000065911 | MTHFD2 |
| 55 | 0.52817 | 10447203 | 19 | 3428 | 0.0529871 | 2.11E-23 | eqtl-a-ENSG00000065989 | rs147394556 | T | C | 0.0126896 | TRUE | reported | igd | 99.3010184 | ENSG00000065989 | PDE4A |
| 56 | -0.0977132 | 10627322 | 19 | 30745 | 0.0138699 | 1.85E-12 | eqtl-a-ENSG00000065989 | rs10416139 | T | C | 0.242111 | TRUE | reported | igd | 49.628547 | ENSG00000065989 | PDE4A |
| 57 | -0.34701 | 10532458 | 19 | 31568 | 0.0208894 | 5.73E-62 | eqtl-a-ENSG00000065989 | rs77376335 | C | T | 0.0872306 | TRUE | reported | igd | 275.933566 | ENSG00000065989 | PDE4A |
| 58 | 0.916296 | 66471234 | 8 | 31684 | 0.0151915 | 1.00E-200 | eqtl-a-ENSG00000066855 | rs7822636 | G | A | 0.142283 | TRUE | reported | igd | 3637.83377 | ENSG00000066855 | MTFR1 |
| 59 | -0.370317 | 66429670 | 8 | 30544 | 0.0404847 | 5.84E-20 | eqtl-a-ENSG00000066855 | rs78377048 | T | C | 0.0219679 | TRUE | reported | igd | 83.663689 | ENSG00000066855 | MTFR1 |
| 60 | 0.230371 | 67404630 | 8 | 25538 | 0.0331846 | 3.87E-12 | eqtl-a-ENSG00000066855 | rs112896121 | A | C | 0.0331574 | TRUE | reported | igd | 48.189057 | ENSG00000066855 | MTFR1 |
| 61 | 0.0717123 | 16170764 | 17 | 31355 | 0.0118959 | 1.66E-09 | eqtl-a-ENSG00000069399 | rs7210990 | A | C | 0.481977 | TRUE | reported | igd | 36.3383322 | ENSG00000069399 | BCL3 |
| 62 | 0.0987122 | 38128648 | 17 | 31470 | 0.0119219 | 1.23E-16 | eqtl-a-ENSG00000069399 | rs3859192 | T | C | 0.455547 | TRUE | reported | igd | 68.5524707 | ENSG00000069399 | BCL3 |
| 63 | 0.141585 | 45242173 | 19 | 31351 | 0.024612 | 8.79E-09 | eqtl-a-ENSG00000069399 | rs1531517 | A | G | 0.0622122 | TRUE | reported | igd | 33.0912347 | ENSG00000069399 | BCL3 |
| 64 | 0.143219 | 141618833 | 3 | 31248 | 0.0168013 | 1.54E-17 | eqtl-a-ENSG00000069849 | rs7616903 | A | G | 0.146228 | TRUE | reported | igd | 72.6587134 | ENSG00000069849 | ATP1B3 |
| 65 | -0.0865223 | 141645272 | 3 | 31256 | 0.0133364 | 8.71E-11 | eqtl-a-ENSG00000069849 | rs1053970 | C | T | 0.273226 | TRUE | reported | igd | 42.0873029 | ENSG00000069849 | ATP1B3 |
| 66 | -0.436008 | 74682602 | 17 | 31347 | 0.0113909 | 1.00E-200 | eqtl-a-ENSG00000070495 | rs720782 | T | C | 0.448369 | TRUE | reported | igd | 1465.02531 | ENSG00000070495 | JMJD6 |
| 67 | 0.281251 | 74852428 | 17 | 25789 | 0.0431916 | 7.44E-11 | eqtl-a-ENSG00000070495 | rs117411047 | T | C | 0.0193043 | TRUE | reported | igd | 42.3990264 | ENSG00000070495 | JMJD6 |
| 68 | 0.188013 | 74828485 | 17 | 31024 | 0.0290327 | 9.43E-11 | eqtl-a-ENSG00000070495 | rs117677736 | T | C | 0.0438214 | TRUE | reported | igd | 41.9346389 | ENSG00000070495 | JMJD6 |
| 69 | -0.0771563 | 32663631 | 6 | 31137 | 0.0138362 | 2.46E-08 | eqtl-a-ENSG00000070718 | rs3129720 | C | T | 0.755679 | TRUE | reported | igd | 31.0943317 | ENSG00000070718 | AP3M2 |
| 70 | -0.0766424 | 90926612 | 6 | 31300 | 0.0122608 | 4.07E-10 | eqtl-a-ENSG00000070718 | rs10806425 | A | C | 0.377483 | TRUE | reported | igd | 39.0726461 | ENSG00000070718 | AP3M2 |
| 71 | -0.0761863 | 28178262 | 7 | 31684 | 0.0139494 | 4.72E-08 | eqtl-a-ENSG00000070718 | rs4722762 | T | G | 0.23858 | TRUE | reported | igd | 29.8273929 | ENSG00000070718 | AP3M2 |
| 72 | -0.146807 | 41910089 | 8 | 31235 | 0.0253448 | 6.94E-09 | eqtl-a-ENSG00000070718 | rs117728641 | A | C | 0.0584289 | TRUE | reported | igd | 33.5496491 | ENSG00000070718 | AP3M2 |
| 73 | -0.435009 | 42002818 | 8 | 31684 | 0.0114996 | 1.00E-200 | eqtl-a-ENSG00000070718 | rs4641052 | G | A | 0.417622 | TRUE | reported | igd | 1430.88128 | ENSG00000070718 | AP3M2 |
| 74 | 0.0759939 | 148514808 | 4 | 31569 | 0.0130477 | 5.74E-09 | eqtl-a-ENSG00000071205 | rs6855339 | G | T | 0.294029 | TRUE | reported | igd | 33.9204829 | ENSG00000071205 | ARHGAP10 |
| 75 | 0.216666 | 148983139 | 4 | 31684 | 0.0121379 | 2.88E-71 | eqtl-a-ENSG00000071205 | rs13109093 | C | A | 0.378049 | TRUE | reported | igd | 318.615578 | ENSG00000071205 | ARHGAP10 |
| 76 | 0.157899 | 58963530 | 19 | 30415 | 0.0137615 | 1.79E-30 | eqtl-a-ENSG00000071205 | rs11671005 | A | G | 0.24568 | TRUE | reported | igd | 131.643267 | ENSG00000071205 | ARHGAP10 |
| 77 | -0.239059 | 66176456 | 15 | 28621 | 0.0431881 | 3.11E-08 | eqtl-a-ENSG00000074621 | rs12900019 | A | G | 0.0193239 | TRUE | reported | igd | 30.637382 | ENSG00000074621 | SLC24A1 |
| 78 | -0.320474 | 65896532 | 15 | 30164 | 0.0265649 | 1.64E-33 | eqtl-a-ENSG00000074621 | rs112912313 | T | C | 0.0524333 | TRUE | reported | igd | 145.525947 | ENSG00000074621 | SLC24A1 |
| 79 | -0.218512 | 45821887 | 22 | 29629 | 0.0117649 | 5.28E-77 | eqtl-a-ENSG00000077935 | rs1022477 | A | G | 0.486559 | TRUE | reported | igd | 344.940976 | ENSG00000077935 | SMC1B |
| 80 | 0.246742 | 3474700 | 9 | 31252 | 0.0243937 | 4.75E-24 | eqtl-a-ENSG00000080298 | rs36019927 | G | A | 0.0630804 | TRUE | reported | igd | 102.306449 | ENSG00000080298 | RFX3 |
| 81 | -0.300197 | 3388125 | 9 | 21295 | 0.0478578 | 3.55E-10 | eqtl-a-ENSG00000080298 | rs62526377 | T | C | 0.0156687 | TRUE | reported | igd | 39.3429068 | ENSG00000080298 | RFX3 |
| 82 | 0.0915642 | 50370254 | 7 | 23869 | 0.0166638 | 3.91E-08 | eqtl-a-ENSG00000083168 | rs149007767 | T | C | 0.149708 | TRUE | reported | igd | 30.1902654 | ENSG00000083168 | KAT6A |
| 83 | -0.270589 | 41773598 | 8 | 22896 | 0.011976 | 4.92E-113 | eqtl-a-ENSG00000083168 | rs4737024 | C | G | 0.39211 | TRUE | reported | igd | 510.456529 | ENSG00000083168 | KAT6A |
| 84 | 0.118014 | 109543002 | 1 | 31192 | 0.0152019 | 8.29E-15 | eqtl-a-ENSG00000085433 | rs337299 | A | G | 0.187961 | TRUE | reported | igd | 60.2619903 | ENSG00000085433 | WDR47 |
| 85 | 0.153367 | 109654794 | 1 | 30591 | 0.015089 | 2.87E-24 | eqtl-a-ENSG00000085433 | rs637466 | C | T | 0.190894 | TRUE | reported | igd | 103.30338 | ENSG00000085433 | WDR47 |
| 86 | -0.189605 | 50703858 | 3 | 26395 | 0.0170914 | 1.35E-28 | eqtl-a-ENSG00000088538 | rs751851 | T | C | 0.860254 | TRUE | reported | igd | 123.058435 | ENSG00000088538 | DOCK3 |
| 87 | 0.40247 | 103125682 | 14 | 14262 | 0.0194351 | 2.92E-95 | eqtl-a-ENSG00000089902 | rs56042316 | G | A | 0.101272 | TRUE | reported | igd | 428.778067 | ENSG00000089902 | RCOR1 |
| 88 | 0.10194 | 102971016 | 14 | 11493 | 0.0121213 | 4.10E-17 | eqtl-a-ENSG00000089902 | rs1046651 | C | T | 0.600535 | TRUE | reported | igd | 70.7156074 | ENSG00000089902 | RCOR1 |
| 89 | -0.651912 | 35244362 | 14 | 30115 | 0.0145175 | 1.00E-200 | eqtl-a-ENSG00000092020 | rs112521249 | T | C | 0.179167 | TRUE | reported | igd | 2016.34776 | ENSG00000092020 | PPP2R3C |
| 90 | -0.986417 | 35363757 | 14 | 26003 | 0.0442542 | 4.65E-110 | eqtl-a-ENSG00000092020 | rs147743811 | G | C | 0.017789 | TRUE | reported | igd | 496.796701 | ENSG00000092020 | PPP2R3C |
| 91 | 0.184521 | 35886556 | 14 | 25866 | 0.0299343 | 7.09E-10 | eqtl-a-ENSG00000092020 | rs138573075 | G | A | 0.0411166 | TRUE | reported | igd | 37.9944187 | ENSG00000092020 | PPP2R3C |
| 92 | 0.292326 | 35388691 | 14 | 24203 | 0.0491156 | 2.66E-09 | eqtl-a-ENSG00000092020 | rs113810230 | G | T | 0.0148685 | TRUE | reported | igd | 35.4209407 | ENSG00000092020 | PPP2R3C |
| 93 | 0.741201 | 35599006 | 14 | 29795 | 0.0285839 | 3.01E-148 | eqtl-a-ENSG00000092020 | rs72664843 | A | G | 0.0432553 | TRUE | reported | igd | 672.35691 | ENSG00000092020 | PPP2R3C |
| 94 | 0.351985 | 35724025 | 14 | 7935 | 0.051896 | 1.18E-11 | eqtl-a-ENSG00000092020 | rs147888654 | T | C | 0.0132867 | TRUE | reported | igd | 45.9908108 | ENSG00000092020 | PPP2R3C |
| 95 | 0.296473 | 35926078 | 14 | 29074 | 0.0193685 | 6.87E-53 | eqtl-a-ENSG00000092020 | rs75776420 | G | A | 0.103623 | TRUE | reported | igd | 234.287136 | ENSG00000092020 | PPP2R3C |
| 96 | 0.212048 | 159206926 | 6 | 25983 | 0.0117721 | 1.55E-72 | eqtl-a-ENSG00000092820 | rs6904701 | T | A | 0.488578 | TRUE | reported | igd | 324.434511 | ENSG00000092820 | EZR |
| 97 | 0.323719 | 159407446 | 6 | 25812 | 0.0198235 | 6.04E-60 | eqtl-a-ENSG00000092820 | rs34582178 | T | C | 0.0980934 | TRUE | reported | igd | 266.650289 | ENSG00000092820 | EZR |
| 98 | 0.111125 | 111973358 | 12 | 22601 | 0.0118802 | 8.47E-21 | eqtl-a-ENSG00000092820 | rs597808 | G | A | 0.52377 | TRUE | reported | igd | 87.4858087 | ENSG00000092820 | EZR |
| 99 | 0.268673 | 117083725 | 9 | 28746 | 0.0302484 | 6.56E-19 | eqtl-a-ENSG00000095397 | rs72746707 | G | A | 0.0401089 | TRUE | reported | igd | 78.8883763 | ENSG00000095397 | WHRN |
| 100 | 0.366355 | 117272439 | 9 | 31353 | 0.0119151 | 1.00E-200 | eqtl-a-ENSG00000095397 | rs1535964 | C | G | 0.372924 | TRUE | reported | igd | 945.325033 | ENSG00000095397 | WHRN |
| 101 | -0.188714 | 35394572 | 10 | 28416 | 0.0155979 | 1.07E-33 | eqtl-a-ENSG00000095794 | rs146330095 | C | G | 0.174584 | TRUE | reported | igd | 146.367754 | ENSG00000095794 | CREM |
| 102 | -0.0731748 | 31593959 | 22 | 31558 | 0.0132338 | 3.21E-08 | eqtl-a-ENSG00000099995 | rs5997913 | A | C | 0.71948 | TRUE | reported | igd | 30.5721815 | ENSG00000099995 | SF3A1 |
| 103 | 0.556322 | 30660521 | 22 | 31553 | 0.0137897 | 1.00E-200 | eqtl-a-ENSG00000099995 | rs75951407 | T | C | 0.21195 | TRUE | reported | igd | 1627.47867 | ENSG00000099995 | SF3A1 |
| 104 | 0.754107 | 30787582 | 22 | 25840 | 0.0470596 | 8.63E-58 | eqtl-a-ENSG00000099995 | rs79082794 | A | G | 0.0159644 | TRUE | reported | igd | 256.765025 | ENSG00000099995 | SF3A1 |
| 105 | -0.129389 | 30169111 | 22 | 25159 | 0.015179 | 1.54E-17 | eqtl-a-ENSG00000099995 | rs5763483 | C | A | 0.188483 | TRUE | reported | igd | 72.6563983 | ENSG00000099995 | SF3A1 |
| 106 | -0.160931 | 30231409 | 22 | 26573 | 0.0231232 | 3.41E-12 | eqtl-a-ENSG00000099995 | rs7292360 | T | A | 0.0710764 | TRUE | reported | igd | 48.4340583 | ENSG00000099995 | SF3A1 |
| 107 | 0.0801229 | 31076490 | 22 | 31352 | 0.0127661 | 3.47E-10 | eqtl-a-ENSG00000099995 | rs757029 | T | C | 0.317654 | TRUE | reported | igd | 39.3884717 | ENSG00000099995 | SF3A1 |
| 108 | -0.161562 | 30838441 | 22 | 31017 | 0.0131407 | 9.66E-35 | eqtl-a-ENSG00000099995 | rs5753142 | T | G | 0.283132 | TRUE | reported | igd | 151.151839 | ENSG00000099995 | SF3A1 |
| 109 | -0.212146 | 43506753 | 22 | 29992 | 0.0142296 | 2.89E-50 | eqtl-a-ENSG00000100290 | rs4988374 | A | C | 0.221134 | TRUE | reported | igd | 222.25695 | ENSG00000100290 | BIK |
| 110 | -0.0909819 | 43480787 | 22 | 31562 | 0.0139502 | 6.95E-11 | eqtl-a-ENSG00000100290 | rs5759153 | G | A | 0.76177 | TRUE | reported | igd | 42.532569 | ENSG00000100290 | BIK |
| 111 | 0.154372 | 43521550 | 22 | 19706 | 0.02753 | 2.05E-08 | eqtl-a-ENSG00000100290 | rs4988427 | G | A | 0.0490397 | TRUE | reported | igd | 31.4398568 | ENSG00000100290 | BIK |
| 112 | -0.105869 | 185409061 | 1 | 31569 | 0.0130168 | 4.18E-16 | eqtl-a-ENSG00000100450 | rs10732976 | A | G | 0.704724 | TRUE | reported | igd | 66.145704 | ENSG00000100450 | GZMH |
| 113 | -0.0954388 | 16864521 | 9 | 31300 | 0.0119391 | 1.31E-15 | eqtl-a-ENSG00000100450 | rs2153271 | T | C | 0.551077 | TRUE | reported | igd | 63.8967853 | ENSG00000100450 | GZMH |
| 114 | -0.0838923 | 94450233 | 10 | 31484 | 0.0120057 | 2.79E-12 | eqtl-a-ENSG00000100450 | rs9420589 | T | G | 0.428682 | TRUE | reported | igd | 48.8249311 | ENSG00000100450 | GZMH |
| 115 | -0.092437 | 112072424 | 12 | 31185 | 0.0122329 | 4.14E-14 | eqtl-a-ENSG00000100450 | rs11065987 | G | A | 0.380678 | TRUE | reported | igd | 57.0959074 | ENSG00000100450 | GZMH |
| 116 | 0.10827 | 24960158 | 14 | 30165 | 0.0183635 | 3.73E-09 | eqtl-a-ENSG00000100450 | rs75812942 | C | T | 0.118932 | TRUE | reported | igd | 34.7597432 | ENSG00000100450 | GZMH |
| 117 | 0.190668 | 25160344 | 14 | 31567 | 0.0118066 | 1.15E-58 | eqtl-a-ENSG00000100450 | rs4982988 | T | C | 0.47788 | TRUE | reported | igd | 260.782477 | ENSG00000100450 | GZMH |
| 118 | -0.0668322 | 56849749 | 3 | 31470 | 0.0122374 | 4.73E-08 | eqtl-a-ENSG00000100991 | rs1354034 | C | T | 0.618137 | TRUE | reported | igd | 29.8239802 | ENSG00000100991 | TRPC4AP |
| 119 | -0.732327 | 32994363 | 20 | 29230 | 0.0297214 | 4.73E-134 | eqtl-a-ENSG00000100991 | rs113645189 | C | T | 0.0400509 | TRUE | reported | igd | 607.074304 | ENSG00000100991 | TRPC4AP |
| 120 | -0.761052 | 33399182 | 20 | 23240 | 0.0430413 | 5.77E-70 | eqtl-a-ENSG00000100991 | rs116862924 | C | T | 0.0190707 | TRUE | reported | igd | 312.622712 | ENSG00000100991 | TRPC4AP |
| 121 | -0.410656 | 34245480 | 20 | 26517 | 0.0353965 | 4.03E-31 | eqtl-a-ENSG00000100991 | rs79311039 | T | G | 0.0288373 | TRUE | reported | igd | 134.586948 | ENSG00000100991 | TRPC4AP |
| 122 | 0.316152 | 32764183 | 20 | 30851 | 0.0253187 | 8.81E-36 | eqtl-a-ENSG00000100991 | rs17332951 | C | T | 0.0580223 | TRUE | reported | igd | 155.912489 | ENSG00000100991 | TRPC4AP |
| 123 | 0.72219 | 33104122 | 20 | 21159 | 0.0400243 | 8.86E-73 | eqtl-a-ENSG00000100991 | rs137942933 | T | G | 0.0221027 | TRUE | reported | igd | 325.547525 | ENSG00000100991 | TRPC4AP |
| 124 | 0.709564 | 33238981 | 20 | 28259 | 0.0177571 | 1.00E-200 | eqtl-a-ENSG00000100991 | rs6087613 | A | G | 0.113899 | TRUE | reported | igd | 1596.64486 | ENSG00000100991 | TRPC4AP |
| 125 | -0.259721 | 37550935 | 20 | 31684 | 0.0153052 | 1.38E-64 | eqtl-a-ENSG00000101447 | rs10392 | A | G | 0.180935 | TRUE | reported | igd | 287.944442 | ENSG00000101447 | FAM83D |
| 126 | 0.137072 | 29597345 | 18 | 14255 | 0.0190531 | 6.28E-13 | eqtl-a-ENSG00000101695 | rs72934839 | T | C | 0.109133 | TRUE | reported | igd | 51.7493941 | ENSG00000101695 | RNF125 |
| 127 | -0.440667 | 29655025 | 18 | 14263 | 0.0271735 | 3.84E-59 | eqtl-a-ENSG00000101695 | rs55786778 | C | T | 0.0495509 | TRUE | reported | igd | 262.947469 | ENSG00000101695 | RNF125 |
| 128 | 0.0678158 | 50427982 | 7 | 25690 | 0.011951 | 1.39E-08 | eqtl-a-ENSG00000102760 | rs6592965 | A | G | 0.449532 | TRUE | reported | igd | 32.1973015 | ENSG00000102760 | RGCC |
| 129 | -0.348427 | 41986283 | 13 | 25242 | 0.0240539 | 1.50E-47 | eqtl-a-ENSG00000102760 | rs4245312 | T | C | 0.935515 | TRUE | reported | igd | 209.806138 | ENSG00000102760 | RGCC |
| 130 | 0.260878 | 42087771 | 13 | 25569 | 0.0117844 | 1.37E-108 | eqtl-a-ENSG00000102760 | rs421706 | C | T | 0.559008 | TRUE | reported | igd | 490.033748 | ENSG00000102760 | RGCC |
| 131 | -0.0824056 | 42120153 | 13 | 25571 | 0.0133738 | 7.19E-10 | eqtl-a-ENSG00000102760 | rs61962996 | T | C | 0.270914 | TRUE | reported | igd | 37.9638138 | ENSG00000102760 | RGCC |
| 132 | -0.1713 | 67796315 | 16 | 28195 | 0.0157054 | 1.06E-27 | eqtl-a-ENSG00000102981 | rs8051587 | C | A | 0.171994 | TRUE | reported | igd | 118.95588 | ENSG00000102981 | PARD6A |
| 133 | 0.100978 | 173287851 | 5 | 31684 | 0.0121379 | 8.87E-17 | eqtl-a-ENSG00000103257 | rs875741 | A | G | 0.396388 | TRUE | reported | igd | 69.205244 | ENSG00000103257 | SLC7A5 |
| 134 | 0.162167 | 50427982 | 7 | 31684 | 0.0118865 | 2.23E-42 | eqtl-a-ENSG00000103257 | rs6592965 | A | G | 0.449532 | TRUE | reported | igd | 186.118507 | ENSG00000103257 | SLC7A5 |
| 135 | 0.152774 | 87779932 | 16 | 26946 | 0.0142342 | 7.14E-27 | eqtl-a-ENSG00000103257 | rs28627428 | A | G | 0.223264 | TRUE | reported | igd | 115.186223 | ENSG00000103257 | SLC7A5 |
| 136 | -0.0743987 | 87584748 | 16 | 31231 | 0.0122216 | 1.15E-09 | eqtl-a-ENSG00000103257 | rs9939461 | A | G | 0.616035 | TRUE | reported | igd | 37.0549942 | ENSG00000103257 | SLC7A5 |
| 137 | -0.231141 | 87876175 | 16 | 23653 | 0.0129241 | 1.55E-71 | eqtl-a-ENSG00000103257 | rs55694638 | T | C | 0.293546 | TRUE | reported | igd | 319.828111 | ENSG00000103257 | SLC7A5 |
| 138 | -0.0713442 | 33946107 | 17 | 31355 | 0.0119741 | 2.55E-09 | eqtl-a-ENSG00000103257 | rs225245 | G | A | 0.440335 | TRUE | reported | igd | 35.4979996 | ENSG00000103257 | SLC7A5 |
| 139 | 0.114109 | 4157072 | 20 | 31569 | 0.0123155 | 1.94E-20 | eqtl-a-ENSG00000103257 | rs6084653 | G | C | 0.36636 | TRUE | reported | igd | 85.8436523 | ENSG00000103257 | SLC7A5 |
| 140 | -0.144616 | 8762414 | 2 | 31569 | 0.0122199 | 2.59E-32 | eqtl-a-ENSG00000103342 | rs3896594 | G | T | 0.377086 | TRUE | reported | igd | 140.04573 | ENSG00000103342 | GSPT1 |
| 141 | 0.16654 | 50427982 | 7 | 31684 | 0.0118822 | 1.25E-44 | eqtl-a-ENSG00000103342 | rs6592965 | A | G | 0.449532 | TRUE | reported | igd | 196.433697 | ENSG00000103342 | GSPT1 |
| 142 | -0.214615 | 54698408 | 12 | 30744 | 0.0199608 | 5.80E-27 | eqtl-a-ENSG00000103342 | rs79755767 | A | G | 0.0977363 | TRUE | reported | igd | 115.59419 | ENSG00000103342 | GSPT1 |
| 143 | 0.180097 | 11903002 | 16 | 26317 | 0.0327562 | 3.84E-08 | eqtl-a-ENSG00000103342 | rs117681034 | A | G | 0.034107 | TRUE | reported | igd | 30.2268522 | ENSG00000103342 | GSPT1 |
| 144 | 0.362537 | 12060301 | 16 | 26478 | 0.0482817 | 5.97E-14 | eqtl-a-ENSG00000103342 | rs11570150 | A | G | 0.0153717 | TRUE | reported | igd | 56.377623 | ENSG00000103342 | GSPT1 |
| 145 | -0.734007 | 12021486 | 16 | 23891 | 0.0362516 | 3.71E-91 | eqtl-a-ENSG00000103342 | rs145980981 | A | G | 0.0269186 | TRUE | reported | igd | 409.929985 | ENSG00000103342 | GSPT1 |
| 146 | -0.215333 | 12009614 | 16 | 31484 | 0.0244175 | 1.16E-18 | eqtl-a-ENSG00000103342 | rs435108 | A | G | 0.936934 | TRUE | reported | igd | 77.7662577 | ENSG00000103342 | GSPT1 |
| 147 | 0.0922916 | 13000550 | 19 | 31569 | 0.0123669 | 8.48E-14 | eqtl-a-ENSG00000103342 | rs56397034 | C | G | 0.361095 | TRUE | reported | igd | 55.6897332 | ENSG00000103342 | GSPT1 |
| 148 | -0.198883 | 41404939 | 22 | 29452 | 0.0279345 | 1.08E-12 | eqtl-a-ENSG00000103342 | rs743002 | C | T | 0.0474874 | TRUE | reported | igd | 50.6855341 | ENSG00000103342 | GSPT1 |
| 149 | -0.0895663 | 80260014 | 15 | 31684 | 0.0137627 | 7.62E-11 | eqtl-a-ENSG00000103522 | rs8026803 | C | T | 0.247924 | TRUE | reported | igd | 42.3501123 | ENSG00000103522 | IL21R |
| 150 | -0.164242 | 27400101 | 16 | 31566 | 0.0175854 | 9.67E-21 | eqtl-a-ENSG00000103522 | rs6498018 | G | A | 0.868993 | TRUE | reported | igd | 87.2240865 | ENSG00000103522 | IL21R |
| 151 | 0.494522 | 27463448 | 16 | 31684 | 0.0140855 | 1.00E-200 | eqtl-a-ENSG00000103522 | rs3093390 | T | C | 0.207092 | TRUE | reported | igd | 1232.53506 | ENSG00000103522 | IL21R |
| 152 | -0.0812674 | 16444697 | 19 | 14710 | 0.0121076 | 1.92E-11 | eqtl-a-ENSG00000103522 | rs10423726 | A | C | 0.595533 | TRUE | reported | igd | 45.0461367 | ENSG00000103522 | IL21R |
| 153 | 0.209718 | 63998649 | 15 | 31567 | 0.0125379 | 8.39E-63 | eqtl-a-ENSG00000103657 | rs17772987 | G | C | 0.32959 | TRUE | reported | igd | 279.765589 | ENSG00000103657 | HERC1 |
| 154 | -0.455539 | 101116429 | 8 | 31468 | 0.0113544 | 1.00E-200 | eqtl-a-ENSG00000104450 | rs2446913 | C | A | 0.55798 | TRUE | reported | igd | 1609.51543 | ENSG00000104450 | SPAG1 |
| 155 | -0.165068 | 101423686 | 8 | 31141 | 0.0288697 | 1.08E-08 | eqtl-a-ENSG00000104450 | rs11786122 | G | A | 0.0443723 | TRUE | reported | igd | 32.6898813 | ENSG00000104450 | SPAG1 |
| 156 | 0.21634 | 100892284 | 8 | 28374 | 0.0269727 | 1.05E-15 | eqtl-a-ENSG00000104450 | rs10464840 | C | T | 0.0510781 | TRUE | reported | igd | 64.3271327 | ENSG00000104450 | SPAG1 |
| 157 | 0.30907 | 101042302 | 8 | 30448 | 0.0305825 | 5.20E-24 | eqtl-a-ENSG00000104450 | rs77017257 | G | A | 0.0391335 | TRUE | reported | igd | 102.126679 | ENSG00000104450 | SPAG1 |
| 158 | 0.107253 | 28724374 | 7 | 31355 | 0.0130963 | 2.62E-16 | eqtl-a-ENSG00000104856 | rs56388170 | T | G | 0.289189 | TRUE | reported | igd | 67.0646967 | ENSG00000104856 | RELB |
| 159 | 0.135895 | 50370254 | 7 | 30077 | 0.0166423 | 3.20E-16 | eqtl-a-ENSG00000104856 | rs149007767 | T | C | 0.149708 | TRUE | reported | igd | 66.6732128 | ENSG00000104856 | RELB |
| 160 | -0.107949 | 6440009 | 12 | 23456 | 0.0120317 | 2.91E-19 | eqtl-a-ENSG00000104856 | rs1800693 | C | T | 0.41823 | TRUE | reported | igd | 80.4907966 | ENSG00000104856 | RELB |
| 161 | -0.232668 | 35572163 | 14 | 30165 | 0.0196731 | 2.84E-32 | eqtl-a-ENSG00000104856 | rs111778408 | A | G | 0.100785 | TRUE | reported | igd | 139.861737 | ENSG00000104856 | RELB |
| 162 | 0.085554 | 38163295 | 17 | 31569 | 0.0122435 | 2.80E-12 | eqtl-a-ENSG00000104856 | rs12600856 | C | T | 0.379553 | TRUE | reported | igd | 48.8249664 | ENSG00000104856 | RELB |
| 163 | 0.0741936 | 45557218 | 19 | 31682 | 0.0118875 | 4.34E-10 | eqtl-a-ENSG00000104856 | rs8111826 | A | G | 0.504209 | TRUE | reported | igd | 38.9515202 | ENSG00000104856 | RELB |
| 164 | -0.262466 | 21520212 | 7 | 31523 | 0.0133903 | 1.50E-85 | eqtl-a-ENSG00000105866 | rs73060317 | G | T | 0.259854 | TRUE | reported | igd | 384.182816 | ENSG00000105866 | SP4 |
| 165 | 0.367945 | 21604332 | 7 | 26850 | 0.0432393 | 1.75E-17 | eqtl-a-ENSG00000105866 | rs78181530 | T | C | 0.0192193 | TRUE | reported | igd | 72.406266 | ENSG00000105866 | SP4 |
| 166 | 0.190945 | 156735507 | 7 | 25000 | 0.0160179 | 9.24E-33 | eqtl-a-ENSG00000105983 | rs57832460 | G | A | 0.16338 | TRUE | reported | igd | 142.092345 | ENSG00000105983 | LMBR1 |
| 167 | 0.239239 | 156426254 | 7 | 25151 | 0.0398208 | 1.88E-09 | eqtl-a-ENSG00000105983 | rs74223543 | T | G | 0.0228023 | TRUE | reported | igd | 36.0918762 | ENSG00000105983 | LMBR1 |
| 168 | -0.60685 | 156513716 | 7 | 26492 | 0.0158235 | 1.00E-200 | eqtl-a-ENSG00000105983 | rs11974194 | C | A | 0.150895 | TRUE | reported | igd | 1470.70247 | ENSG00000105983 | LMBR1 |
| 169 | 0.159156 | 117122770 | 9 | 31684 | 0.0118293 | 2.90E-41 | eqtl-a-ENSG00000106948 | rs10122672 | T | C | 0.507685 | TRUE | reported | igd | 181.009148 | ENSG00000106948 | AKNA |
| 170 | -0.262939 | 117191839 | 9 | 31557 | 0.0120064 | 2.60E-106 | eqtl-a-ENSG00000106948 | rs4978585 | T | C | 0.388906 | TRUE | reported | igd | 479.575372 | ENSG00000106948 | AKNA |
| 171 | -0.246003 | 49772697 | 10 | 29971 | 0.0399394 | 7.30E-10 | eqtl-a-ENSG00000107643 | rs17660982 | T | C | 0.0226608 | TRUE | reported | igd | 37.9357568 | ENSG00000107643 | MAPK8 |
| 172 | 0.338588 | 49659637 | 10 | 31242 | 0.0115896 | 1.26E-187 | eqtl-a-ENSG00000107643 | rs3827681 | C | T | 0.536235 | TRUE | reported | igd | 853.450677 | ENSG00000107643 | MAPK8 |
| 173 | 0.268058 | 103407342 | 4 | 30810 | 0.012031 | 5.70E-110 | eqtl-a-ENSG00000109320 | rs11097787 | T | C | 0.383439 | TRUE | reported | igd | 496.393287 | ENSG00000109320 | NFKB1 |
| 174 | -0.271743 | 103941426 | 4 | 26453 | 0.0369347 | 1.87E-13 | eqtl-a-ENSG00000109320 | rs113738337 | T | C | 0.0265739 | TRUE | reported | igd | 54.127098 | ENSG00000109320 | NFKB1 |
| 175 | -0.0798641 | 111904371 | 12 | 27668 | 0.0119076 | 1.98E-11 | eqtl-a-ENSG00000109320 | rs4766578 | A | T | 0.531061 | TRUE | reported | igd | 44.9804022 | ENSG00000109320 | NFKB1 |
| 176 | -0.135499 | 35572163 | 14 | 29416 | 0.0197374 | 6.64E-12 | eqtl-a-ENSG00000109320 | rs111778408 | A | G | 0.100785 | TRUE | reported | igd | 47.1262373 | ENSG00000109320 | NFKB1 |
| 177 | 0.141936 | 26719569 | 4 | 27895 | 0.025777 | 3.67E-08 | eqtl-a-ENSG00000109680 | rs34600164 | C | T | 0.056376 | TRUE | reported | igd | 30.3172107 | ENSG00000109680 | TBC1D19 |
| 178 | -0.266943 | 186346870 | 4 | 31527 | 0.0235468 | 8.62E-30 | eqtl-a-ENSG00000109762 | rs79698659 | G | A | 0.0679262 | TRUE | reported | igd | 128.512607 | ENSG00000109762 | SNX25 |
| 179 | 0.544102 | 186163343 | 4 | 31306 | 0.0111163 | 1.00E-200 | eqtl-a-ENSG00000109762 | rs7655203 | G | A | 0.42977 | TRUE | reported | igd | 2395.58939 | ENSG00000109762 | SNX25 |
| 180 | 0.212869 | 186491688 | 4 | 31200 | 0.0377328 | 1.69E-08 | eqtl-a-ENSG00000109762 | rs11725078 | A | G | 0.025473 | TRUE | reported | igd | 31.8243053 | ENSG00000109762 | SNX25 |
| 181 | -0.158327 | 186424197 | 4 | 25443 | 0.0269443 | 4.20E-09 | eqtl-a-ENSG00000109762 | rs150457799 | T | C | 0.051306 | TRUE | reported | igd | 34.525662 | ENSG00000109762 | SNX25 |
| 182 | -0.251926 | 116655600 | 11 | 9188 | 0.0243175 | 3.77E-25 | eqtl-a-ENSG00000109917 | rs35120633 | A | G | 0.0634814 | TRUE | reported | igd | 107.303426 | ENSG00000109917 | ZPR1 |
| 183 | -0.126255 | 3691649 | 11 | 31684 | 0.0119798 | 5.72E-26 | eqtl-a-ENSG00000110713 | rs2672215 | C | A | 0.571423 | TRUE | reported | igd | 111.063312 | ENSG00000110713 | NUP98 |
| 184 | 0.105955 | 57860826 | 12 | 31683 | 0.0126256 | 4.77E-17 | eqtl-a-ENSG00000111087 | rs4760259 | C | T | 0.669949 | TRUE | reported | igd | 70.4225009 | ENSG00000111087 | GLI1 |
| 185 | 0.11757 | 50370254 | 7 | 30077 | 0.0166522 | 1.66E-12 | eqtl-a-ENSG00000111266 | rs149007767 | T | C | 0.149708 | TRUE | reported | igd | 49.8449219 | ENSG00000111266 | DUSP16 |
| 186 | 0.319864 | 12631696 | 12 | 29142 | 0.0328335 | 2.00E-22 | eqtl-a-ENSG00000111266 | rs117414157 | T | C | 0.0337807 | TRUE | reported | igd | 94.9000761 | ENSG00000111266 | DUSP16 |
| 187 | 0.118061 | 12845381 | 12 | 31569 | 0.0208504 | 1.49E-08 | eqtl-a-ENSG00000111266 | rs11610142 | C | G | 0.0892655 | TRUE | reported | igd | 32.0594906 | ENSG00000111266 | DUSP16 |
| 188 | -0.706247 | 12617994 | 12 | 31563 | 0.0203529 | 1.00E-200 | eqtl-a-ENSG00000111266 | rs4570678 | T | C | 0.0862277 | TRUE | reported | igd | 1204.01837 | ENSG00000111266 | DUSP16 |
| 189 | 0.236312 | 12694295 | 12 | 26834 | 0.0337768 | 2.63E-12 | eqtl-a-ENSG00000111266 | rs11054965 | G | A | 0.0319638 | TRUE | reported | igd | 48.9443062 | ENSG00000111266 | DUSP16 |
| 190 | -0.33536 | 90976768 | 6 | 28895 | 0.0160653 | 9.04E-97 | eqtl-a-ENSG00000112182 | rs72928038 | A | G | 0.158151 | TRUE | reported | igd | 435.72731 | ENSG00000112182 | BACH2 |
| 191 | -0.0765973 | 90646226 | 6 | 31470 | 0.0125953 | 1.19E-09 | eqtl-a-ENSG00000112182 | rs292251 | A | G | 0.665207 | TRUE | reported | igd | 36.9813098 | ENSG00000112182 | BACH2 |
| 192 | 0.0820048 | 130613614 | 8 | 31355 | 0.0120199 | 8.95E-12 | eqtl-a-ENSG00000112182 | rs10098310 | A | G | 0.575007 | TRUE | reported | igd | 46.5424387 | ENSG00000112182 | BACH2 |
| 193 | -0.078378 | 38051348 | 17 | 31086 | 0.0118854 | 4.27E-11 | eqtl-a-ENSG00000112182 | rs8067378 | G | A | 0.497388 | TRUE | reported | igd | 43.4843324 | ENSG00000112182 | BACH2 |
| 194 | -0.107691 | 142791133 | 5 | 30902 | 0.0144913 | 1.07E-13 | eqtl-a-ENSG00000113580 | rs4912908 | A | G | 0.786309 | TRUE | reported | igd | 55.2224939 | ENSG00000113580 | NR3C1 |
| 195 | 0.116475 | 50370254 | 7 | 30077 | 0.0166528 | 2.67E-12 | eqtl-a-ENSG00000113580 | rs149007767 | T | C | 0.149708 | TRUE | reported | igd | 48.9172491 | ENSG00000113580 | NR3C1 |
| 196 | -0.162279 | 53922620 | 3 | 31528 | 0.0118769 | 1.67E-42 | eqtl-a-ENSG00000113811 | rs3816144 | G | A | 0.453535 | TRUE | reported | igd | 186.677035 | ENSG00000113811 | SELENOK |
| 197 | 0.629166 | 65140092 | 2 | 31568 | 0.0166064 | 1.00E-200 | eqtl-a-ENSG00000115902 | rs35741999 | A | G | 0.134753 | TRUE | reported | igd | 1435.33074 | ENSG00000115902 | SLC1A4 |
| 198 | -0.211823 | 65264463 | 2 | 26232 | 0.0351335 | 1.65E-09 | eqtl-a-ENSG00000115902 | rs115747343 | A | G | 0.0294938 | TRUE | reported | igd | 36.3471433 | ENSG00000115902 | SLC1A4 |
| 199 | -0.281852 | 65348069 | 2 | 26674 | 0.042206 | 2.43E-11 | eqtl-a-ENSG00000115902 | rs1477008 | T | C | 0.979768 | TRUE | reported | igd | 44.5924453 | ENSG00000115902 | SLC1A4 |
| 200 | -0.353709 | 67529243 | 1 | 14263 | 0.0116294 | 1.00E-200 | eqtl-a-ENSG00000116704 | rs2755263 | G | A | 0.564715 | TRUE | reported | igd | 924.946687 | ENSG00000116704 | SLC35D1 |
| 201 | -0.457728 | 119448908 | 1 | 30688 | 0.012089 | 1.00E-200 | eqtl-a-ENSG00000116874 | rs4300262 | C | T | 0.326906 | TRUE | reported | igd | 1433.52707 | ENSG00000116874 | WARS2 |
| 202 | -0.299997 | 119564775 | 1 | 26641 | 0.0155428 | 5.23E-83 | eqtl-a-ENSG00000116874 | rs12410517 | C | T | 0.172681 | TRUE | reported | igd | 372.514088 | ENSG00000116874 | WARS2 |
| 203 | -0.111846 | 120259794 | 1 | 31351 | 0.0169299 | 3.93E-11 | eqtl-a-ENSG00000116874 | rs28501188 | A | G | 0.143922 | TRUE | reported | igd | 43.6419776 | ENSG00000116874 | WARS2 |
| 204 | -0.108794 | 119322011 | 1 | 31355 | 0.0183975 | 3.35E-09 | eqtl-a-ENSG00000116874 | rs12086399 | A | C | 0.118423 | TRUE | reported | igd | 34.9674984 | ENSG00000116874 | WARS2 |
| 205 | -0.71932 | 119673481 | 1 | 26280 | 0.0160108 | 1.00E-200 | eqtl-a-ENSG00000116874 | rs9428294 | A | C | 0.859308 | TRUE | reported | igd | 2018.29737 | ENSG00000116874 | WARS2 |
| 206 | 0.426633 | 119880045 | 1 | 27157 | 0.0360481 | 2.57E-32 | eqtl-a-ENSG00000116874 | rs4659001 | C | T | 0.0277628 | TRUE | reported | igd | 140.059363 | ENSG00000116874 | WARS2 |
| 207 | 0.130745 | 40562993 | 1 | 31483 | 0.0184486 | 1.37E-12 | eqtl-a-ENSG00000117000 | rs6600313 | C | T | 0.882479 | TRUE | reported | igd | 50.222203 | ENSG00000117000 | RLF |
| 208 | 0.0654338 | 157000716 | 1 | 31251 | 0.0118919 | 3.75E-08 | eqtl-a-ENSG00000117036 | rs1763914 | A | G | 0.50686 | TRUE | reported | igd | 30.2742918 | ENSG00000117036 | ETV3 |
| 209 | 0.395912 | 136259946 | 3 | 28588 | 0.0205951 | 2.35E-82 | eqtl-a-ENSG00000118007 | rs67281610 | A | G | 0.0893708 | TRUE | reported | igd | 369.52101 | ENSG00000118007 | STAG1 |
| 210 | -0.456977 | 70766865 | 1 | 31351 | 0.020997 | 5.09E-105 | eqtl-a-ENSG00000118454 | rs3795695 | C | T | 0.0849566 | TRUE | reported | igd | 473.637938 | ENSG00000118454 | ANKRD13C |
| 211 | -0.168274 | 95251911 | 5 | 14262 | 0.0131192 | 1.16E-37 | eqtl-a-ENSG00000118985 | rs1841010 | C | G | 0.284226 | TRUE | reported | igd | 164.497168 | ENSG00000118985 | ELL2 |
| 212 | -0.143642 | 196665854 | 3 | 26609 | 0.0118489 | 8.00E-34 | eqtl-a-ENSG00000119231 | rs555582 | G | A | 0.517062 | TRUE | reported | igd | 146.951551 | ENSG00000119231 | SENP5 |
| 213 | -0.140284 | 74252993 | 14 | 30280 | 0.0215014 | 6.83E-11 | eqtl-a-ENSG00000119725 | rs929450 | G | A | 0.916663 | TRUE | reported | igd | 42.5651451 | ENSG00000119725 | ZNF410 |
| 214 | 0.240717 | 74374485 | 14 | 31568 | 0.0188415 | 2.24E-37 | eqtl-a-ENSG00000119725 | rs111480651 | G | A | 0.110954 | TRUE | reported | igd | 163.213117 | ENSG00000119725 | ZNF410 |
| 215 | -0.238197 | 30364733 | 2 | 29143 | 0.0331612 | 6.82E-13 | eqtl-a-ENSG00000119801 | rs111645443 | A | G | 0.0331976 | TRUE | reported | igd | 51.5919916 | ENSG00000119801 | YPEL5 |
| 216 | 0.399511 | 30381867 | 2 | 26710 | 0.0436519 | 5.58E-20 | eqtl-a-ENSG00000119801 | rs76886327 | C | T | 0.0188352 | TRUE | reported | igd | 83.7565267 | ENSG00000119801 | YPEL5 |
| 217 | -0.101503 | 33923607 | 17 | 31484 | 0.0155696 | 7.06E-11 | eqtl-a-ENSG00000119801 | rs11653357 | A | G | 0.17703 | TRUE | reported | igd | 42.498662 | ENSG00000119801 | YPEL5 |
| 218 | 0.109856 | 99483427 | 10 | 30902 | 0.0157402 | 2.97E-12 | eqtl-a-ENSG00000119986 | rs75595199 | A | G | 0.172107 | TRUE | reported | igd | 48.7078502 | ENSG00000119986 | AVPI1 |
| 219 | -0.590462 | 99461017 | 10 | 31315 | 0.0307848 | 5.40E-82 | eqtl-a-ENSG00000119986 | rs11189339 | A | G | 0.037862 | TRUE | reported | igd | 367.860787 | ENSG00000119986 | AVPI1 |
| 220 | -0.503064 | 27260630 | 10 | 27271 | 0.0123183 | 1.00E-200 | eqtl-a-ENSG00000120539 | rs7079276 | A | T | 0.296966 | TRUE | reported | igd | 1667.68136 | ENSG00000120539 | MASTL |
| 221 | 0.377419 | 27396333 | 10 | 17582 | 0.0485558 | 7.68E-15 | eqtl-a-ENSG00000120539 | rs59944577 | A | G | 0.0151915 | TRUE | reported | igd | 60.4109808 | ENSG00000120539 | MASTL |
| 222 | -0.854838 | 27475275 | 10 | 31470 | 0.026124 | 1.00E-200 | eqtl-a-ENSG00000120539 | rs73598041 | C | T | 0.0508287 | TRUE | reported | igd | 1070.68246 | ENSG00000120539 | MASTL |
| 223 | -0.535712 | 27573857 | 10 | 21815 | 0.0542032 | 4.90E-23 | eqtl-a-ENSG00000120539 | rs150932561 | A | G | 0.012121 | TRUE | reported | igd | 97.6726741 | ENSG00000120539 | MASTL |
| 224 | -0.394663 | 27668928 | 10 | 28159 | 0.0330123 | 6.10E-33 | eqtl-a-ENSG00000120539 | rs114675448 | C | T | 0.0332861 | TRUE | reported | igd | 142.912564 | ENSG00000120539 | MASTL |
| 225 | 0.456996 | 38132334 | 19 | 31684 | 0.0115081 | 1.00E-200 | eqtl-a-ENSG00000120784 | rs2927743 | G | A | 0.596978 | TRUE | reported | igd | 1576.84908 | ENSG00000120784 | ZFP30 |
| 226 | 0.15557 | 38334361 | 19 | 31567 | 0.0119079 | 5.25E-39 | eqtl-a-ENSG00000120784 | rs73025613 | T | C | 0.556281 | TRUE | reported | igd | 170.66868 | ENSG00000120784 | ZFP30 |
| 227 | 0.206578 | 50226011 | 16 | 31229 | 0.0128813 | 7.03E-58 | eqtl-a-ENSG00000121274 | rs11076521 | T | C | 0.70083 | TRUE | reported | igd | 257.170372 | ENSG00000121274 | TENT4B |
| 228 | 0.376528 | 50369888 | 16 | 31684 | 0.0155897 | 7.05E-129 | eqtl-a-ENSG00000121274 | rs4595801 | T | C | 0.168289 | TRUE | reported | igd | 583.299527 | ENSG00000121274 | TENT4B |
| 229 | -0.0772293 | 37810464 | 9 | 15915 | 0.0121575 | 2.12E-10 | eqtl-a-ENSG00000122741 | rs10973564 | C | T | 0.395021 | TRUE | reported | igd | 40.3479116 | ENSG00000122741 | DCAF10 |
| 230 | -0.782485 | 37821103 | 9 | 6937 | 0.0481689 | 2.43E-59 | eqtl-a-ENSG00000122741 | rs73646104 | T | C | 0.0152185 | TRUE | reported | igd | 263.811277 | ENSG00000122741 | DCAF10 |
| 231 | 0.154086 | 43979439 | 19 | 31565 | 0.0129998 | 2.08E-32 | eqtl-a-ENSG00000124466 | rs2599437 | C | T | 0.29396 | TRUE | reported | igd | 140.483559 | ENSG00000124466 | LYPD3 |
| 232 | -0.196427 | 144385777 | 6 | 25735 | 0.0266064 | 1.55E-13 | eqtl-a-ENSG00000125772 | rs149110519 | T | C | 0.0526158 | TRUE | reported | igd | 54.499985 | ENSG00000125772 | GPCPD1 |
| 233 | -0.085378 | 28724374 | 7 | 31355 | 0.0131076 | 7.33E-11 | eqtl-a-ENSG00000125772 | rs56388170 | T | G | 0.289189 | TRUE | reported | igd | 42.4246133 | ENSG00000125772 | GPCPD1 |
| 234 | 0.087532 | 5785482 | 20 | 31569 | 0.0149676 | 4.98E-09 | eqtl-a-ENSG00000125772 | rs1151948 | T | C | 0.196252 | TRUE | reported | igd | 34.1980901 | ENSG00000125772 | GPCPD1 |
| 235 | 0.904089 | 5594755 | 20 | 26066 | 0.0393957 | 1.51E-116 | eqtl-a-ENSG00000125772 | rs141259732 | A | G | 0.0225096 | TRUE | reported | igd | 526.612791 | ENSG00000125772 | GPCPD1 |
| 236 | 0.208188 | 5668714 | 20 | 24632 | 0.0119098 | 2.03E-68 | eqtl-a-ENSG00000125772 | rs805770 | T | C | 0.425449 | TRUE | reported | igd | 305.539374 | ENSG00000125772 | GPCPD1 |
| 237 | 0.28829 | 5609343 | 20 | 19119 | 0.0184002 | 2.52E-55 | eqtl-a-ENSG00000125772 | rs111833508 | C | G | 0.116384 | TRUE | reported | igd | 245.453165 | ENSG00000125772 | GPCPD1 |
| 238 | 0.0725554 | 160794497 | 1 | 31569 | 0.0119693 | 1.35E-09 | eqtl-a-ENSG00000126353 | rs504848 | T | C | 0.441839 | TRUE | reported | igd | 36.7429872 | ENSG00000126353 | CCR7 |
| 239 | 0.0824578 | 38372055 | 4 | 31569 | 0.0126053 | 6.09E-11 | eqtl-a-ENSG00000126353 | rs1386622 | G | T | 0.666547 | TRUE | reported | igd | 42.78875 | ENSG00000126353 | CCR7 |
| 240 | 0.0978931 | 32412435 | 6 | 29827 | 0.0164242 | 2.52E-09 | eqtl-a-ENSG00000126353 | rs3177928 | A | G | 0.155018 | TRUE | reported | igd | 35.522751 | ENSG00000126353 | CCR7 |
| 241 | 0.123492 | 38772965 | 17 | 31684 | 0.0118615 | 2.20E-25 | eqtl-a-ENSG00000126353 | rs9894823 | T | C | 0.48803 | TRUE | reported | igd | 108.385456 | ENSG00000126353 | CCR7 |
| 242 | -0.0890818 | 30577771 | 22 | 31684 | 0.0118983 | 7.06E-14 | eqtl-a-ENSG00000126353 | rs714027 | G | A | 0.52781 | TRUE | reported | igd | 56.050659 | ENSG00000126353 | CCR7 |
| 243 | 0.0794722 | 64975679 | 14 | 30280 | 0.0119154 | 2.57E-11 | eqtl-a-ENSG00000126804 | rs13329053 | C | T | 0.464174 | TRUE | reported | igd | 44.4820232 | ENSG00000126804 | ZBTB1 |
| 244 | -0.0962129 | 8942268 | 12 | 13417 | 0.0145493 | 3.77E-11 | eqtl-a-ENSG00000126838 | rs12372656 | T | G | 0.2116 | TRUE | reported | igd | 43.7237769 | ENSG00000126838 | PZP |
| 245 | 0.142266 | 9393593 | 12 | 13755 | 0.0119088 | 6.78E-33 | eqtl-a-ENSG00000126838 | rs877169 | C | T | 0.552182 | TRUE | reported | igd | 142.693137 | ENSG00000126838 | PZP |
| 246 | -0.510819 | 9151467 | 12 | 13755 | 0.0117086 | 1.00E-200 | eqtl-a-ENSG00000126838 | rs1805719 | G | A | 0.350633 | TRUE | reported | igd | 1903.09731 | ENSG00000126838 | PZP |
| 247 | 0.107568 | 148200011 | 5 | 31569 | 0.0120333 | 3.91E-19 | eqtl-a-ENSG00000128016 | rs56330463 | C | T | 0.582097 | TRUE | reported | igd | 79.9041222 | ENSG00000128016 | ZFP36 |
| 248 | -0.110944 | 108212353 | 7 | 31684 | 0.0118781 | 9.62E-21 | eqtl-a-ENSG00000128590 | rs1043615 | A | G | 0.521722 | TRUE | reported | igd | 87.2340971 | ENSG00000128590 | DNAJB9 |
| 249 | -0.26314 | 175598045 | 2 | 31565 | 0.0220742 | 9.22E-33 | eqtl-a-ENSG00000128656 | rs72916796 | A | G | 0.0780672 | TRUE | reported | igd | 142.094175 | ENSG00000128656 | CHN1 |
| 250 | -0.0938927 | 176441451 | 2 | 31346 | 0.0125696 | 8.02E-14 | eqtl-a-ENSG00000128656 | rs4072527 | C | T | 0.336664 | TRUE | reported | igd | 55.7947107 | ENSG00000128656 | CHN1 |
| 251 | -0.516981 | 175647816 | 2 | 31236 | 0.0118612 | 1.00E-200 | eqtl-a-ENSG00000128656 | rs112149954 | C | A | 0.332422 | TRUE | reported | igd | 1899.60848 | ENSG00000128656 | CHN1 |
| 252 | -0.0710758 | 69254191 | 14 | 31684 | 0.0119069 | 2.38E-09 | eqtl-a-ENSG00000128656 | rs4902647 | T | C | 0.472227 | TRUE | reported | igd | 35.6302349 | ENSG00000128656 | CHN1 |
| 253 | 0.080653 | 11230703 | 16 | 31684 | 0.0136369 | 3.33E-09 | eqtl-a-ENSG00000128656 | rs7203459 | C | T | 0.255075 | TRUE | reported | igd | 34.9769814 | ENSG00000128656 | CHN1 |
| 254 | 0.158025 | 41757647 | 22 | 31569 | 0.0142105 | 1.00E-28 | eqtl-a-ENSG00000128656 | rs4822024 | A | G | 0.224124 | TRUE | reported | igd | 123.653202 | ENSG00000128656 | CHN1 |
| 255 | -0.19229 | 54685880 | 12 | 24448 | 0.025598 | 5.82E-14 | eqtl-a-ENSG00000130449 | rs35979828 | T | C | 0.0571059 | TRUE | reported | igd | 56.4242506 | ENSG00000130449 | ZSWIM6 |
| 256 | 0.0752525 | 39091487 | 20 | 26181 | 0.0133181 | 1.60E-08 | eqtl-a-ENSG00000130449 | rs2902940 | G | A | 0.274749 | TRUE | reported | igd | 31.924503 | ENSG00000130449 | ZSWIM6 |
| 257 | 0.372853 | 54021834 | 19 | 31354 | 0.0114875 | 1.00E-200 | eqtl-a-ENSG00000130844 | rs1284523 | G | A | 0.514513 | TRUE | reported | igd | 1053.4078 | ENSG00000130844 | ZNF331 |
| 258 | -0.150188 | 54071246 | 19 | 30402 | 0.0126033 | 9.70E-33 | eqtl-a-ENSG00000130844 | rs4803145 | A | T | 0.329079 | TRUE | reported | igd | 141.995097 | ENSG00000130844 | ZNF331 |
| 259 | 0.310845 | 77160066 | 18 | 19630 | 0.0157795 | 2.19E-86 | eqtl-a-ENSG00000131196 | rs117314773 | A | G | 0.166023 | TRUE | reported | igd | 388.022622 | ENSG00000131196 | NFATC1 |
| 260 | 0.272899 | 77200655 | 18 | 24610 | 0.0176748 | 8.81E-54 | eqtl-a-ENSG00000131196 | rs76617579 | T | C | 0.127855 | TRUE | reported | igd | 238.37438 | ENSG00000131196 | NFATC1 |
| 261 | 0.0957489 | 50370254 | 7 | 30077 | 0.0166621 | 9.12E-09 | eqtl-a-ENSG00000131323 | rs149007767 | T | C | 0.149708 | TRUE | reported | igd | 33.0201646 | ENSG00000131323 | TRAF3 |
| 262 | -0.0657653 | 6447522 | 12 | 31684 | 0.0119235 | 3.48E-08 | eqtl-a-ENSG00000131323 | rs4149577 | A | G | 0.537074 | TRUE | reported | igd | 30.4199632 | ENSG00000131323 | TRAF3 |
| 263 | -0.15617 | 35572163 | 14 | 30165 | 0.0197266 | 2.44E-15 | eqtl-a-ENSG00000131323 | rs111778408 | A | G | 0.100785 | TRUE | reported | igd | 62.6703252 | ENSG00000131323 | TRAF3 |
| 264 | -0.301379 | 103243408 | 14 | 31146 | 0.0118527 | 1.27E-142 | eqtl-a-ENSG00000131323 | rs71421262 | G | A | 0.594319 | TRUE | reported | igd | 646.492516 | ENSG00000131323 | TRAF3 |
| 265 | -0.0949507 | 103371247 | 14 | 29498 | 0.0156025 | 1.16E-09 | eqtl-a-ENSG00000131323 | rs141926895 | A | G | 0.176166 | TRUE | reported | igd | 37.0321147 | ENSG00000131323 | TRAF3 |
| 266 | 0.243653 | 16414198 | 3 | 31565 | 0.0118823 | 1.92E-93 | eqtl-a-ENSG00000131378 | rs689662 | A | G | 0.579785 | TRUE | reported | igd | 420.450605 | ENSG00000131378 | RFTN1 |
| 267 | 0.167897 | 16293425 | 3 | 31684 | 0.0118552 | 1.57E-45 | eqtl-a-ENSG00000131378 | rs842246 | C | T | 0.461423 | TRUE | reported | igd | 200.558322 | ENSG00000131378 | RFTN1 |
| 268 | 0.265786 | 16591256 | 3 | 31569 | 0.0169367 | 1.69E-55 | eqtl-a-ENSG00000131378 | rs74642013 | C | A | 0.141353 | TRUE | reported | igd | 246.251621 | ENSG00000131378 | RFTN1 |
| 269 | -0.247438 | 7595379 | 17 | 5003 | 0.037928 | 6.85E-11 | eqtl-a-ENSG00000132510 | rs181975550 | T | C | 0.0251849 | TRUE | reported | igd | 42.5440921 | ENSG00000132510 | KDM6B |
| 270 | -0.33792 | 7784295 | 17 | 26395 | 0.0227813 | 8.94E-50 | eqtl-a-ENSG00000132510 | rs17807204 | G | A | 0.0724567 | TRUE | reported | igd | 220.007699 | ENSG00000132510 | KDM6B |
| 271 | -0.21181 | 23332297 | 20 | 31185 | 0.0176496 | 3.51E-33 | eqtl-a-ENSG00000132661 | rs6132598 | C | G | 0.12928 | TRUE | reported | igd | 144.010889 | ENSG00000132661 | NXT1 |
| 272 | -0.0882273 | 23464683 | 20 | 31557 | 0.011998 | 1.93E-13 | eqtl-a-ENSG00000132661 | rs2983286 | A | T | 0.569727 | TRUE | reported | igd | 54.0705438 | ENSG00000132661 | NXT1 |
| 273 | -0.158887 | 55850269 | 19 | 26534 | 0.0128634 | 4.75E-35 | eqtl-a-ENSG00000133247 | rs1870073 | A | G | 0.304526 | TRUE | reported | igd | 152.557107 | ENSG00000133247 | KMT5C |
| 274 | -0.0794797 | 92362263 | 14 | 25084 | 0.0124715 | 1.86E-10 | eqtl-a-ENSG00000133962 | rs2430362 | G | T | 0.651351 | TRUE | reported | igd | 40.6106955 | ENSG00000133962 | CATSPERB |
| 275 | 0.325115 | 92330819 | 14 | 26604 | 0.0121995 | 1.80E-156 | eqtl-a-ENSG00000133962 | rs2052204 | A | G | 0.347072 | TRUE | reported | igd | 710.16179 | ENSG00000133962 | CATSPERB |
| 276 | 0.294596 | 114427450 | 1 | 31524 | 0.0121408 | 4.59E-130 | eqtl-a-ENSG00000134242 | rs2884603 | G | A | 0.361074 | TRUE | reported | igd | 588.750823 | ENSG00000134242 | PTPN22 |
| 277 | 0.0754523 | 88129351 | 9 | 31348 | 0.0121175 | 4.77E-10 | eqtl-a-ENSG00000135040 | rs1364629 | T | C | 0.402971 | TRUE | reported | igd | 38.7695893 | ENSG00000135040 | NAA35 |
| 278 | 0.340986 | 88636887 | 9 | 31470 | 0.0148715 | 2.40E-116 | eqtl-a-ENSG00000135040 | rs7450 | A | G | 0.190838 | TRUE | reported | igd | 525.69754 | ENSG00000135040 | NAA35 |
| 279 | 0.0786593 | 43360065 | 2 | 26953 | 0.0136512 | 8.31E-09 | eqtl-a-ENSG00000135114 | rs28498283 | T | A | 0.254318 | TRUE | reported | igd | 33.1990968 | ENSG00000135114 | OASL |
| 280 | 0.164792 | 50370254 | 7 | 30077 | 0.0166238 | 3.66E-23 | eqtl-a-ENSG00000135114 | rs149007767 | T | C | 0.149708 | TRUE | reported | igd | 98.2613573 | ENSG00000135114 | OASL |
| 281 | -0.086328 | 50305863 | 7 | 31300 | 0.0127763 | 1.41E-11 | eqtl-a-ENSG00000135114 | rs4917014 | G | T | 0.316454 | TRUE | reported | igd | 45.6525884 | ENSG00000135114 | OASL |
| 282 | -0.0746401 | 139356987 | 9 | 27284 | 0.0130383 | 1.04E-08 | eqtl-a-ENSG00000135114 | rs57994353 | C | T | 0.294804 | TRUE | reported | igd | 32.769563 | ENSG00000135114 | OASL |
| 283 | 0.0890119 | 38258842 | 10 | 28917 | 0.0128305 | 3.99E-12 | eqtl-a-ENSG00000135114 | rs2749592 | A | C | 0.311446 | TRUE | reported | igd | 48.1259086 | ENSG00000135114 | OASL |
| 284 | 0.21357 | 120838305 | 12 | 30541 | 0.0287861 | 1.18E-13 | eqtl-a-ENSG00000135114 | rs111378975 | T | C | 0.0445692 | TRUE | reported | igd | 55.04101 | ENSG00000135114 | OASL |
| 285 | -0.216848 | 121214656 | 12 | 29661 | 0.0264082 | 2.19E-16 | eqtl-a-ENSG00000135114 | rs509150 | T | G | 0.946596 | TRUE | reported | igd | 67.4223609 | ENSG00000135114 | OASL |
| 286 | 0.462754 | 121419056 | 12 | 31684 | 0.0113775 | 1.00E-200 | eqtl-a-ENSG00000135114 | rs1169286 | C | T | 0.428877 | TRUE | reported | igd | 1654.16665 | ENSG00000135114 | OASL |
| 287 | 0.283053 | 121431272 | 12 | 31683 | 0.0136593 | 2.18E-95 | eqtl-a-ENSG00000135114 | rs2071190 | A | T | 0.243592 | TRUE | reported | igd | 429.389303 | ENSG00000135114 | OASL |
| 288 | 0.190242 | 120500434 | 12 | 28586 | 0.0169304 | 2.70E-29 | eqtl-a-ENSG00000135127 | rs7958497 | C | G | 0.142908 | TRUE | reported | igd | 126.254824 | ENSG00000135127 | BICDL1 |
| 289 | 0.378128 | 105188996 | 7 | 28209 | 0.0313154 | 1.44E-33 | eqtl-a-ENSG00000135249 | rs113947297 | A | G | 0.0371315 | TRUE | reported | igd | 145.791081 | ENSG00000135249 | RINT1 |
| 290 | -0.236608 | 105277115 | 7 | 28591 | 0.0360876 | 5.50E-11 | eqtl-a-ENSG00000135249 | rs111522698 | A | C | 0.0278959 | TRUE | reported | igd | 42.9845582 | ENSG00000135249 | RINT1 |
| 291 | -0.325983 | 105150427 | 7 | 29138 | 0.0377496 | 5.85E-18 | eqtl-a-ENSG00000135249 | rs138438310 | A | G | 0.0253709 | TRUE | reported | igd | 74.5650624 | ENSG00000135249 | RINT1 |
| 292 | -0.100749 | 56449435 | 12 | 31558 | 0.0128696 | 4.93E-15 | eqtl-a-ENSG00000135414 | rs7302200 | A | G | 0.307518 | TRUE | reported | igd | 61.280721 | ENSG00000135414 | GDF11 |
| 293 | -0.692056 | 135961688 | 6 | 31239 | 0.0120706 | 1.00E-200 | eqtl-a-ENSG00000135541 | rs72982200 | G | C | 0.270219 | TRUE | reported | igd | 3286.97919 | ENSG00000135541 | AHI1 |
| 294 | -0.275611 | 136265004 | 6 | 25602 | 0.0391171 | 1.84E-12 | eqtl-a-ENSG00000135541 | rs77726388 | C | T | 0.0236274 | TRUE | reported | igd | 49.6393248 | ENSG00000135541 | AHI1 |
| 295 | 0.492111 | 135926235 | 6 | 29808 | 0.030979 | 8.02E-57 | eqtl-a-ENSG00000135541 | rs117753979 | G | A | 0.0376824 | TRUE | reported | igd | 252.326124 | ENSG00000135541 | AHI1 |
| 296 | -0.46235 | 135591392 | 6 | 30077 | 0.012049 | 1.00E-200 | eqtl-a-ENSG00000135541 | rs7772778 | G | A | 0.329554 | TRUE | reported | igd | 1472.34924 | ENSG00000135541 | AHI1 |
| 297 | 0.222858 | 219302466 | 2 | 31684 | 0.012164 | 5.63E-75 | eqtl-a-ENSG00000135913 | rs733925 | A | G | 0.3729 | TRUE | reported | igd | 335.641938 | ENSG00000135913 | USP37 |
| 298 | -0.0723613 | 50305863 | 7 | 14263 | 0.0127824 | 1.50E-08 | eqtl-a-ENSG00000136052 | rs4917014 | G | T | 0.316454 | TRUE | reported | igd | 32.0425456 | ENSG00000136052 | SLC41A2 |
| 299 | -0.211293 | 105353244 | 12 | 14263 | 0.0172976 | 2.58E-34 | eqtl-a-ENSG00000136052 | rs4075503 | G | T | 0.135518 | TRUE | reported | igd | 149.189279 | ENSG00000136052 | SLC41A2 |
| 300 | -0.0726897 | 105157690 | 12 | 13925 | 0.0122714 | 3.15E-09 | eqtl-a-ENSG00000136052 | rs2004806 | T | G | 0.623891 | TRUE | reported | igd | 35.0828726 | ENSG00000136052 | SLC41A2 |
| 301 | 0.249132 | 170125011 | 3 | 28267 | 0.03231 | 1.25E-14 | eqtl-a-ENSG00000136603 | rs75287841 | G | A | 0.0350164 | TRUE | reported | igd | 59.4503456 | ENSG00000136603 | SKIL |
| 302 | -0.353117 | 170116284 | 3 | 27066 | 0.0423762 | 7.88E-17 | eqtl-a-ENSG00000136603 | rs74568838 | T | C | 0.0200309 | TRUE | reported | igd | 69.4322342 | ENSG00000136603 | SKIL |
| 303 | 0.146054 | 26939456 | 9 | 31568 | 0.0201087 | 3.79E-13 | eqtl-a-ENSG00000137055 | rs12002068 | C | A | 0.0966104 | TRUE | reported | igd | 52.7510861 | ENSG00000137055 | PLAA |
| 304 | 0.133944 | 27176886 | 9 | 31684 | 0.0146661 | 6.68E-20 | eqtl-a-ENSG00000137055 | rs2224530 | C | T | 0.206265 | TRUE | reported | igd | 83.4045666 | ENSG00000137055 | PLAA |
| 305 | -0.116175 | 170230625 | 4 | 31468 | 0.0151116 | 1.50E-14 | eqtl-a-ENSG00000137601 | rs13115031 | T | C | 0.809073 | TRUE | reported | igd | 59.0985547 | ENSG00000137601 | NEK1 |
| 306 | 0.426169 | 170545697 | 4 | 31343 | 0.011825 | 1.00E-200 | eqtl-a-ENSG00000137601 | rs7696352 | A | G | 0.365777 | TRUE | reported | igd | 1298.77434 | ENSG00000137601 | NEK1 |
| 307 | -0.143431 | 116510542 | 11 | 30547 | 0.0249052 | 8.45E-09 | eqtl-a-ENSG00000137656 | rs79315770 | A | T | 0.0606548 | TRUE | reported | igd | 33.1648128 | ENSG00000137656 | BUD13 |
| 308 | 0.215806 | 116626735 | 11 | 31566 | 0.0118408 | 3.23E-74 | eqtl-a-ENSG00000137656 | rs180322 | C | T | 0.44383 | TRUE | reported | igd | 332.15242 | ENSG00000137656 | BUD13 |
| 309 | 0.192948 | 89341515 | 1 | 31683 | 0.0124797 | 6.38E-54 | eqtl-a-ENSG00000137947 | rs12057453 | T | C | 0.337699 | TRUE | reported | igd | 239.025841 | ENSG00000137947 | GTF2B |
| 310 | -0.237736 | 28374419 | 2 | 28725 | 0.0427099 | 2.60E-08 | eqtl-a-ENSG00000138074 | rs187126206 | A | G | 0.0197674 | TRUE | reported | igd | 30.9815081 | ENSG00000138074 | SLC5A6 |
| 311 | -0.125794 | 26733677 | 2 | 30901 | 0.0198266 | 2.23E-10 | eqtl-a-ENSG00000138074 | rs7582117 | A | G | 0.0998219 | TRUE | reported | igd | 40.2527221 | ENSG00000138074 | SLC5A6 |
| 312 | 0.204069 | 27364946 | 2 | 29139 | 0.0293131 | 3.36E-12 | eqtl-a-ENSG00000138074 | rs62128709 | G | A | 0.0429272 | TRUE | reported | igd | 48.4619365 | ENSG00000138074 | SLC5A6 |
| 313 | -0.527138 | 27387429 | 2 | 31231 | 0.0124375 | 1.00E-200 | eqtl-a-ENSG00000138074 | rs2384575 | C | T | 0.28353 | TRUE | reported | igd | 1796.19982 | ENSG00000138074 | SLC5A6 |
| 314 | 0.0754647 | 191948272 | 2 | 26225 | 0.0121631 | 5.49E-10 | eqtl-a-ENSG00000138378 | rs16833249 | T | C | 0.605872 | TRUE | reported | igd | 38.4916052 | ENSG00000138378 | STAT4 |
| 315 | -0.0919002 | 112007756 | 12 | 23343 | 0.0119167 | 1.24E-14 | eqtl-a-ENSG00000138378 | rs653178 | T | C | 0.539991 | TRUE | reported | igd | 59.4680488 | ENSG00000138378 | STAT4 |
| 316 | 0.651448 | 170427222 | 2 | 14262 | 0.0154699 | 1.00E-200 | eqtl-a-ENSG00000138399 | rs12467047 | C | G | 0.155758 | TRUE | reported | igd | 1773.06065 | ENSG00000138399 | FASTKD1 |
| 317 | 0.103665 | 170702233 | 2 | 14167 | 0.015627 | 3.28E-11 | eqtl-a-ENSG00000138399 | rs12052418 | T | C | 0.175354 | TRUE | reported | igd | 43.9999076 | ENSG00000138399 | FASTKD1 |
| 318 | -0.136591 | 170393957 | 2 | 13755 | 0.0250303 | 4.84E-08 | eqtl-a-ENSG00000138399 | rs12987510 | T | C | 0.0600238 | TRUE | reported | igd | 29.7748037 | ENSG00000138399 | FASTKD1 |
| 319 | -0.167487 | 627712 | 12 | 31228 | 0.0166075 | 6.44E-24 | eqtl-a-ENSG00000139044 | rs35527562 | T | G | 0.150021 | TRUE | reported | igd | 101.701151 | ENSG00000139044 | B4GALNT3 |
| 320 | 0.451796 | 656004 | 12 | 26614 | 0.0115652 | 1.00E-200 | eqtl-a-ENSG00000139044 | rs4980834 | A | C | 0.39512 | TRUE | reported | igd | 1525.96942 | ENSG00000139044 | B4GALNT3 |
| 321 | 0.230178 | 628608 | 12 | 20131 | 0.0397572 | 7.06E-09 | eqtl-a-ENSG00000139044 | rs71447491 | G | A | 0.0228812 | TRUE | reported | igd | 33.516055 | ENSG00000139044 | B4GALNT3 |
| 322 | -0.0748689 | 120257576 | 1 | 31569 | 0.0129368 | 7.16E-09 | eqtl-a-ENSG00000139514 | rs477992 | G | A | 0.697082 | TRUE | reported | igd | 33.4905023 | ENSG00000139514 | SLC7A1 |
| 323 | 0.31715 | 30367812 | 13 | 29139 | 0.0370931 | 1.23E-17 | eqtl-a-ENSG00000139514 | rs144251629 | C | T | 0.0263049 | TRUE | reported | igd | 73.0993241 | ENSG00000139514 | SLC7A1 |
| 324 | 0.300547 | 30590308 | 13 | 31240 | 0.0274251 | 6.04E-28 | eqtl-a-ENSG00000139514 | rs12583653 | C | T | 0.0491114 | TRUE | reported | igd | 120.088259 | ENSG00000139514 | SLC7A1 |
| 325 | 0.892673 | 30187453 | 13 | 31235 | 0.0190185 | 1.00E-200 | eqtl-a-ENSG00000139514 | rs9506207 | A | T | 0.0934442 | TRUE | reported | igd | 2202.94912 | ENSG00000139514 | SLC7A1 |
| 326 | -0.546969 | 123364198 | 12 | 31684 | 0.0166025 | 1.00E-200 | eqtl-a-ENSG00000139722 | rs7139055 | T | C | 0.861475 | TRUE | reported | igd | 1085.30307 | ENSG00000139722 | VPS37B |
| 327 | 0.159843 | 78352442 | 13 | 30480 | 0.0226448 | 1.68E-12 | eqtl-a-ENSG00000139737 | rs138198514 | C | T | 0.0743672 | TRUE | reported | igd | 49.82207 | ENSG00000139737 | SLAIN1 |
| 328 | -0.191981 | 100471108 | 15 | 14263 | 0.0119861 | 9.72E-58 | eqtl-a-ENSG00000140470 | rs2573644 | T | C | 0.411473 | TRUE | reported | igd | 256.507344 | ENSG00000140470 | ADAMTS17 |
| 329 | 0.0807476 | 100801698 | 15 | 14263 | 0.012738 | 2.31E-10 | eqtl-a-ENSG00000140470 | rs4965613 | A | G | 0.679732 | TRUE | reported | igd | 40.1786976 | ENSG00000140470 | ADAMTS17 |
| 330 | -0.126932 | 100872747 | 15 | 14263 | 0.014075 | 1.91E-19 | eqtl-a-ENSG00000140470 | rs12324075 | T | C | 0.231275 | TRUE | reported | igd | 81.3175971 | ENSG00000140470 | ADAMTS17 |
| 331 | 0.129363 | 50677571 | 16 | 31562 | 0.0131771 | 9.48E-23 | eqtl-a-ENSG00000140807 | rs4486887 | T | C | 0.717654 | TRUE | reported | igd | 96.3724617 | ENSG00000140807 | NKD1 |
| 332 | 0.22945 | 23740118 | 18 | 22692 | 0.0195056 | 6.04E-32 | eqtl-a-ENSG00000141384 | rs9951169 | A | C | 0.10276 | TRUE | reported | igd | 138.36276 | ENSG00000141384 | TAF4B |
| 333 | -0.286213 | 78102517 | 17 | 31679 | 0.0121227 | 3.05E-123 | eqtl-a-ENSG00000141543 | rs12451471 | T | C | 0.365396 | TRUE | reported | igd | 557.381534 | ENSG00000141543 | EIF4A3 |
| 334 | -0.152488 | 78068948 | 17 | 31593 | 0.0136535 | 5.81E-29 | eqtl-a-ENSG00000141543 | rs1982244 | T | C | 0.251716 | TRUE | reported | igd | 124.725672 | ENSG00000141543 | EIF4A3 |
| 335 | 0.436793 | 144385777 | 6 | 25735 | 0.026403 | 1.79E-61 | eqtl-a-ENSG00000141968 | rs149110519 | T | C | 0.0526158 | TRUE | reported | igd | 273.659819 | ENSG00000141968 | VAV1 |
| 336 | -0.137172 | 6759845 | 19 | 31564 | 0.0182855 | 6.30E-14 | eqtl-a-ENSG00000141968 | rs56408517 | G | T | 0.119899 | TRUE | reported | igd | 56.2716619 | ENSG00000141968 | VAV1 |
| 337 | 0.214259 | 41813013 | 19 | 27878 | 0.0320569 | 2.33E-11 | eqtl-a-ENSG00000142039 | rs10826 | T | C | 0.0356313 | TRUE | reported | igd | 44.6687649 | ENSG00000142039 | CCDC97 |
| 338 | -0.115249 | 41856886 | 19 | 31682 | 0.0127442 | 1.52E-19 | eqtl-a-ENSG00000142039 | rs2241715 | C | A | 0.682076 | TRUE | reported | igd | 81.7752269 | ENSG00000142039 | CCDC97 |
| 339 | 0.158005 | 150011092 | 1 | 23615 | 0.0287926 | 4.07E-08 | eqtl-a-ENSG00000143384 | rs115033554 | C | T | 0.0446305 | TRUE | reported | igd | 30.1122432 | ENSG00000143384 | ADAMTSL4-AS1 |
| 340 | -0.326097 | 150584103 | 1 | 31470 | 0.0143639 | 4.23E-114 | eqtl-a-ENSG00000143384 | rs4970966 | T | G | 0.209553 | TRUE | reported | igd | 515.372522 | ENSG00000143384 | ADAMTSL4-AS1 |
| 341 | -0.123179 | 127009395 | 9 | 31355 | 0.0158167 | 6.81E-15 | eqtl-a-ENSG00000143384 | rs55793580 | T | C | 0.169838 | TRUE | reported | igd | 60.6476379 | ENSG00000143384 | ADAMTSL4-AS1 |
| 342 | -0.581073 | 42310322 | 2 | 31684 | 0.0110245 | 1.00E-200 | eqtl-a-ENSG00000143924 | rs1866670 | T | G | 0.419539 | TRUE | reported | igd | 2777.89722 | ENSG00000143924 | EML4 |
| 343 | -0.128773 | 42408413 | 2 | 31564 | 0.0118757 | 2.14E-27 | eqtl-a-ENSG00000143924 | rs2579961 | T | G | 0.469931 | TRUE | reported | igd | 117.571937 | ENSG00000143924 | EML4 |
| 344 | -0.0666654 | 43161520 | 2 | 31561 | 0.0120511 | 3.17E-08 | eqtl-a-ENSG00000143924 | rs1009374 | C | T | 0.418674 | TRUE | reported | igd | 30.5999049 | ENSG00000143924 | EML4 |
| 345 | -0.0768216 | 43113357 | 2 | 31560 | 0.0123878 | 5.60E-10 | eqtl-a-ENSG00000143924 | rs4350801 | T | C | 0.359317 | TRUE | reported | igd | 38.4548218 | ENSG00000143924 | EML4 |
| 346 | 0.201671 | 39227664 | 3 | 31683 | 0.0146836 | 6.32E-43 | eqtl-a-ENSG00000144655 | rs61736155 | A | G | 0.203567 | TRUE | reported | igd | 188.622891 | ENSG00000144655 | CSRNP1 |
| 347 | -0.0801664 | 148200011 | 5 | 31569 | 0.0120484 | 2.86E-11 | eqtl-a-ENSG00000144655 | rs56330463 | C | T | 0.582097 | TRUE | reported | igd | 44.2688758 | ENSG00000144655 | CSRNP1 |
| 348 | 0.111436 | 38156712 | 17 | 31185 | 0.0122249 | 7.84E-20 | eqtl-a-ENSG00000144655 | rs4794822 | T | C | 0.380161 | TRUE | reported | igd | 83.086898 | ENSG00000144655 | CSRNP1 |
| 349 | -0.157 | 164045822 | 4 | 31684 | 0.015294 | 1.01E-24 | eqtl-a-ENSG00000145414 | rs1055263 | G | A | 0.81572 | TRUE | reported | igd | 105.373091 | ENSG00000145414 | NAF1 |
| 350 | -0.152692 | 86360752 | 5 | 31564 | 0.0136828 | 6.44E-29 | eqtl-a-ENSG00000145715 | rs2544692 | A | C | 0.749896 | TRUE | reported | igd | 124.524581 | ENSG00000145715 | RASA1 |
| 351 | -0.215827 | 121399747 | 6 | 26125 | 0.0335125 | 1.19E-10 | eqtl-a-ENSG00000146350 | rs73766687 | G | A | 0.0325053 | TRUE | reported | igd | 41.472923 | ENSG00000146350 | TBC1D32 |
| 352 | -0.162138 | 121655392 | 6 | 26173 | 0.0227566 | 1.04E-12 | eqtl-a-ENSG00000146350 | rs9490162 | G | A | 0.0735704 | TRUE | reported | igd | 50.7600082 | ENSG00000146350 | TBC1D32 |
| 353 | -0.218949 | 77729519 | 11 | 30902 | 0.0121197 | 5.95E-73 | eqtl-a-ENSG00000149262 | rs10899427 | A | G | 0.380455 | TRUE | reported | igd | 326.342836 | ENSG00000149262 | INTS4 |
| 354 | 0.492688 | 77246702 | 11 | 31565 | 0.0130563 | 1.00E-200 | eqtl-a-ENSG00000149262 | rs6592726 | C | T | 0.747471 | TRUE | reported | igd | 1423.88925 | ENSG00000149262 | INTS4 |
| 355 | -0.0782751 | 77099564 | 11 | 30902 | 0.012559 | 4.59E-10 | eqtl-a-ENSG00000149262 | rs491781 | A | T | 0.661343 | TRUE | reported | igd | 38.8426662 | ENSG00000149262 | INTS4 |
| 356 | 0.109397 | 35076347 | 14 | 30280 | 0.0193001 | 1.44E-08 | eqtl-a-ENSG00000151327 | rs17102628 | G | T | 0.10615 | TRUE | reported | igd | 32.1264709 | ENSG00000151327 | FAM177A1 |
| 357 | -0.313982 | 35500702 | 14 | 31684 | 0.0116323 | 1.82E-160 | eqtl-a-ENSG00000151327 | rs7147346 | T | C | 0.467492 | TRUE | reported | igd | 728.535803 | ENSG00000151327 | FAM177A1 |
| 358 | 0.126969 | 35604350 | 14 | 30162 | 0.0147082 | 6.01E-18 | eqtl-a-ENSG00000151327 | rs4494460 | G | A | 0.204847 | TRUE | reported | igd | 74.515659 | ENSG00000151327 | FAM177A1 |
| 359 | -0.289842 | 129872785 | 4 | 9188 | 0.0124492 | 6.75E-120 | eqtl-a-ENSG00000151466 | rs4975191 | G | C | 0.327112 | TRUE | reported | igd | 541.932507 | ENSG00000151466 | SCLT1 |
| 360 | -0.165482 | 130359747 | 4 | 9184 | 0.0270922 | 1.01E-09 | eqtl-a-ENSG00000151466 | rs10518549 | G | A | 0.0507052 | TRUE | reported | igd | 37.3008209 | ENSG00000151466 | SCLT1 |
| 361 | 0.0800804 | 28780373 | 10 | 9188 | 0.0143308 | 2.29E-08 | eqtl-a-ENSG00000151466 | rs2998286 | C | T | 0.779099 | TRUE | reported | igd | 31.2188609 | ENSG00000151466 | SCLT1 |
| 362 | 0.211318 | 14655417 | 11 | 31559 | 0.0132096 | 1.34E-57 | eqtl-a-ENSG00000152270 | rs12270702 | A | G | 0.275034 | TRUE | reported | igd | 255.897549 | ENSG00000152270 | PDE3B |
| 363 | 0.445307 | 78434291 | 5 | 26196 | 0.0117327 | 1.00E-200 | eqtl-a-ENSG00000152409 | rs2364596 | T | C | 0.371547 | TRUE | reported | igd | 1440.42269 | ENSG00000152409 | JMY |
| 364 | -0.276638 | 78694487 | 5 | 20267 | 0.043078 | 1.34E-10 | eqtl-a-ENSG00000152409 | rs62363106 | C | T | 0.0194099 | TRUE | reported | igd | 41.2353561 | ENSG00000152409 | JMY |
| 365 | -0.359694 | 6179711 | 4 | 26633 | 0.011542 | 1.00E-200 | eqtl-a-ENSG00000152969 | rs60046962 | T | C | 0.534795 | TRUE | reported | igd | 971.117169 | ENSG00000152969 | JAKMIP1 |
| 366 | -0.0995766 | 6196412 | 4 | 23225 | 0.0119281 | 6.94E-17 | eqtl-a-ENSG00000152969 | rs879420 | G | A | 0.547449 | TRUE | reported | igd | 69.6842521 | ENSG00000152969 | JAKMIP1 |
| 367 | 0.168711 | 109357772 | 2 | 22081 | 0.013822 | 2.89E-34 | eqtl-a-ENSG00000153201 | rs826565 | C | T | 0.242086 | TRUE | reported | igd | 148.972355 | ENSG00000153201 | RANBP2 |
| 368 | 0.132799 | 157358052 | 2 | 31644 | 0.0130945 | 3.61E-24 | eqtl-a-ENSG00000153234 | rs297588 | G | A | 0.711902 | TRUE | reported | igd | 102.845269 | ENSG00000153234 | NR4A2 |
| 369 | 0.139868 | 98125372 | 5 | 31233 | 0.0197749 | 1.52E-12 | eqtl-a-ENSG00000153922 | rs76887708 | A | G | 0.100333 | TRUE | reported | igd | 50.0242201 | ENSG00000153922 | CHD1 |
| 370 | 0.15772 | 19177629 | 21 | 29793 | 0.0121852 | 2.55E-38 | eqtl-a-ENSG00000154645 | rs2824498 | T | C | 0.619264 | TRUE | reported | igd | 167.524781 | ENSG00000154645 | CHODL |
| 371 | 0.117575 | 19195454 | 21 | 29158 | 0.0188961 | 4.91E-10 | eqtl-a-ENSG00000154645 | rs11911436 | T | C | 0.111331 | TRUE | reported | igd | 38.7129109 | ENSG00000154645 | CHODL |
| 372 | 0.217232 | 65680103 | 7 | 25365 | 0.0328617 | 3.83E-11 | eqtl-a-ENSG00000154710 | rs142209595 | A | G | 0.0338471 | TRUE | reported | igd | 43.6951569 | ENSG00000154710 | RABGEF1 |
| 373 | -0.798596 | 66304262 | 7 | 18948 | 0.0324738 | 1.53E-133 | eqtl-a-ENSG00000154710 | rs62465699 | C | A | 0.0333212 | TRUE | reported | igd | 604.7031 | ENSG00000154710 | RABGEF1 |
| 374 | -0.526679 | 66744171 | 7 | 13168 | 0.0415349 | 7.59E-37 | eqtl-a-ENSG00000154710 | rs187024495 | C | A | 0.0207321 | TRUE | reported | igd | 160.768033 | ENSG00000154710 | RABGEF1 |
| 375 | -0.353586 | 76124184 | 10 | 13762 | 0.0444326 | 1.75E-15 | eqtl-a-ENSG00000156110 | rs77869325 | T | C | 0.0181935 | TRUE | reported | igd | 63.3174693 | ENSG00000156110 | ADK |
| 376 | 1.51374 | 76382714 | 10 | 15845 | 0.0436477 | 1.00E-200 | eqtl-a-ENSG00000156110 | rs139236357 | A | G | 0.0174378 | TRUE | reported | igd | 1202.6106 | ENSG00000156110 | ADK |
| 377 | -0.375172 | 76416384 | 10 | 20848 | 0.0351736 | 1.46E-26 | eqtl-a-ENSG00000156110 | rs117276858 | T | C | 0.0292594 | TRUE | reported | igd | 113.758939 | ENSG00000156110 | ADK |
| 378 | -0.362739 | 75999969 | 10 | 19288 | 0.0415508 | 2.54E-18 | eqtl-a-ENSG00000156110 | rs151229713 | T | C | 0.020842 | TRUE | reported | igd | 76.2052142 | ENSG00000156110 | ADK |
| 379 | -0.41186 | 76489516 | 10 | 17131 | 0.0504248 | 3.14E-16 | eqtl-a-ENSG00000156110 | rs140246072 | A | G | 0.0140638 | TRUE | reported | igd | 66.7052715 | ENSG00000156110 | ADK |
| 380 | 0.17528 | 75979691 | 10 | 17033 | 0.0119737 | 1.59E-48 | eqtl-a-ENSG00000156110 | rs11000927 | G | T | 0.581357 | TRUE | reported | igd | 214.267837 | ENSG00000156110 | ADK |
| 381 | 1.40767 | 76241121 | 10 | 22498 | 0.0449893 | 1.00E-200 | eqtl-a-ENSG00000156110 | rs72818590 | T | C | 0.0166432 | TRUE | reported | igd | 978.914202 | ENSG00000156110 | ADK |
| 382 | -0.367232 | 76423929 | 10 | 4945 | 0.0540476 | 1.08E-11 | eqtl-a-ENSG00000156110 | rs117118249 | G | A | 0.0122367 | TRUE | reported | igd | 46.1479616 | ENSG00000156110 | ADK |
| 383 | 0.362356 | 76960825 | 10 | 5149 | 0.0360303 | 8.57E-24 | eqtl-a-ENSG00000156110 | rs186361033 | T | C | 0.0278695 | TRUE | reported | igd | 101.103557 | ENSG00000156110 | ADK |
| 384 | 1.06615 | 75712012 | 10 | 24054 | 0.0265108 | 1.00E-200 | eqtl-a-ENSG00000156110 | rs138780162 | A | G | 0.0474741 | TRUE | reported | igd | 1617.1669 | ENSG00000156110 | ADK |
| 385 | -0.376045 | 75818457 | 10 | 16231 | 0.0456815 | 1.84E-16 | eqtl-a-ENSG00000156110 | rs75154343 | C | T | 0.0171893 | TRUE | reported | igd | 67.7556331 | ENSG00000156110 | ADK |
| 386 | 1.34623 | 76098400 | 10 | 13042 | 0.0473377 | 6.70E-178 | eqtl-a-ENSG00000156110 | rs78704481 | T | C | 0.0151817 | TRUE | reported | igd | 808.644465 | ENSG00000156110 | ADK |
| 387 | 1.46031 | 75811479 | 10 | 19554 | 0.0379869 | 1.00E-200 | eqtl-a-ENSG00000156110 | rs71473718 | C | T | 0.0227388 | TRUE | reported | igd | 1477.67181 | ENSG00000156110 | ADK |
| 388 | -0.232358 | 76143042 | 10 | 17975 | 0.0420877 | 3.37E-08 | eqtl-a-ENSG00000156110 | rs72818557 | G | A | 0.0203695 | TRUE | reported | igd | 30.4759006 | ENSG00000156110 | ADK |
| 389 | -0.0887769 | 140702682 | 7 | 14263 | 0.0142616 | 4.82E-10 | eqtl-a-ENSG00000157764 | rs1044927 | T | C | 0.776251 | TRUE | reported | igd | 38.7438296 | ENSG00000157764 | BRAF |
| 390 | 0.090593 | 39307162 | 3 | 31300 | 0.0159996 | 1.49E-08 | eqtl-a-ENSG00000158321 | rs3732378 | A | G | 0.165434 | TRUE | reported | igd | 32.0585062 | ENSG00000158321 | AUTS2 |
| 391 | -0.103859 | 169497585 | 3 | 31684 | 0.0137588 | 4.40E-14 | eqtl-a-ENSG00000158321 | rs1317082 | G | A | 0.247755 | TRUE | reported | igd | 56.9770216 | ENSG00000158321 | AUTS2 |
| 392 | -0.072999 | 117210052 | 6 | 31300 | 0.0127793 | 1.11E-08 | eqtl-a-ENSG00000158321 | rs339331 | C | T | 0.316721 | TRUE | reported | igd | 32.6281116 | ENSG00000158321 | AUTS2 |
| 393 | 0.239369 | 69986753 | 7 | 28966 | 0.0432879 | 3.21E-08 | eqtl-a-ENSG00000158321 | rs73177713 | A | G | 0.0192332 | TRUE | reported | igd | 30.5754451 | ENSG00000158321 | AUTS2 |
| 394 | 0.571505 | 70144848 | 7 | 31684 | 0.0151884 | 1.00E-200 | eqtl-a-ENSG00000158321 | rs10234816 | C | T | 0.167669 | TRUE | reported | igd | 1415.75662 | ENSG00000158321 | AUTS2 |
| 395 | 0.390744 | 70114808 | 7 | 31355 | 0.0200915 | 3.02E-84 | eqtl-a-ENSG00000158321 | rs77393802 | T | C | 0.0943683 | TRUE | reported | igd | 378.209305 | ENSG00000158321 | AUTS2 |
| 396 | -0.0969752 | 70529017 | 7 | 31568 | 0.0159226 | 1.13E-09 | eqtl-a-ENSG00000158321 | rs34723238 | G | A | 0.167365 | TRUE | reported | igd | 37.0907728 | ENSG00000158321 | AUTS2 |
| 397 | -0.139146 | 69444643 | 7 | 30852 | 0.0201497 | 4.99E-12 | eqtl-a-ENSG00000158321 | rs12672441 | G | A | 0.0962098 | TRUE | reported | igd | 47.6843788 | ENSG00000158321 | AUTS2 |
| 398 | -0.0883969 | 10560957 | 12 | 31300 | 0.0126166 | 2.45E-12 | eqtl-a-ENSG00000158321 | rs2617170 | C | T | 0.668027 | TRUE | reported | igd | 49.0864529 | ENSG00000158321 | AUTS2 |
| 399 | -0.076563 | 41587556 | 22 | 31484 | 0.0139505 | 4.06E-08 | eqtl-a-ENSG00000158321 | rs9607782 | A | T | 0.238522 | TRUE | reported | igd | 30.1183204 | ENSG00000158321 | AUTS2 |
| 400 | 0.145773 | 43297338 | 15 | 30219 | 0.012925 | 1.68E-29 | eqtl-a-ENSG00000159459 | rs62020705 | A | G | 0.699621 | TRUE | reported | igd | 127.193329 | ENSG00000159459 | UBR1 |
| 401 | -0.185442 | 42910624 | 15 | 30603 | 0.0185411 | 1.50E-23 | eqtl-a-ENSG00000159459 | rs12914539 | A | C | 0.115706 | TRUE | reported | igd | 100.026905 | ENSG00000159459 | UBR1 |
| 402 | -0.0710306 | 2274235 | 4 | 23871 | 0.0119011 | 2.40E-09 | eqtl-a-ENSG00000159733 | rs12506024 | A | G | 0.52301 | TRUE | reported | igd | 35.618889 | ENSG00000159733 | ZFYVE28 |
| 403 | 0.288518 | 2408411 | 4 | 31355 | 0.0121631 | 2.21E-124 | eqtl-a-ENSG00000159733 | rs12499021 | A | G | 0.359513 | TRUE | reported | igd | 562.638658 | ENSG00000159733 | ZFYVE28 |
| 404 | 0.0925432 | 32586854 | 6 | 13055 | 0.0164612 | 1.89E-08 | eqtl-a-ENSG00000160307 | rs9271366 | A | G | 0.845781 | TRUE | reported | igd | 31.6009038 | ENSG00000160307 | S100B |
| 405 | -0.0898881 | 38051348 | 17 | 14263 | 0.0118796 | 3.83E-14 | eqtl-a-ENSG00000160307 | rs8067378 | G | A | 0.497388 | TRUE | reported | igd | 57.2453037 | ENSG00000160307 | S100B |
| 406 | -0.338894 | 48024746 | 21 | 14263 | 0.0115611 | 7.05E-189 | eqtl-a-ENSG00000160307 | rs2839363 | G | A | 0.513417 | TRUE | reported | igd | 859.149105 | ENSG00000160307 | S100B |
| 407 | -0.113767 | 47526719 | 21 | 14257 | 0.011889 | 1.08E-21 | eqtl-a-ENSG00000160307 | rs4819201 | A | G | 0.531711 | TRUE | reported | igd | 91.5547814 | ENSG00000160307 | S100B |
| 408 | -0.500866 | 47579668 | 21 | 11496 | 0.013256 | 1.00E-200 | eqtl-a-ENSG00000160307 | rs4819210 | G | A | 0.758708 | TRUE | reported | igd | 1427.38967 | ENSG00000160307 | S100B |
| 409 | -0.371777 | 47966977 | 21 | 12811 | 0.0174165 | 4.21E-101 | eqtl-a-ENSG00000160307 | rs16979358 | T | C | 0.130038 | TRUE | reported | igd | 455.591343 | ENSG00000160307 | S100B |
| 410 | -0.358307 | 116838130 | 11 | 31684 | 0.0251814 | 6.04E-46 | eqtl-a-ENSG00000160584 | rs12281729 | C | A | 0.0584952 | TRUE | reported | igd | 202.452632 | ENSG00000160584 | SIK3 |
| 411 | 0.933356 | 156089631 | 1 | 28471 | 0.0260086 | 1.00E-200 | eqtl-a-ENSG00000160789 | rs609625 | G | C | 0.0505428 | TRUE | reported | igd | 1287.74593 | ENSG00000160789 | LMNA |
| 412 | -0.0813472 | 156241354 | 1 | 27811 | 0.013125 | 5.72E-10 | eqtl-a-ENSG00000160789 | rs12119005 | A | G | 0.288045 | TRUE | reported | igd | 38.4109776 | ENSG00000160789 | LMNA |
| 413 | 0.0682383 | 8445160 | 2 | 31569 | 0.0118905 | 9.52E-09 | eqtl-a-ENSG00000160789 | rs2630709 | T | A | 0.493998 | TRUE | reported | igd | 32.9327994 | ENSG00000160789 | LMNA |
| 414 | 0.187931 | 56849749 | 3 | 31684 | 0.0121478 | 5.50E-54 | eqtl-a-ENSG00000160789 | rs1354034 | C | T | 0.618137 | TRUE | reported | igd | 239.317341 | ENSG00000160789 | LMNA |
| 415 | 0.0753975 | 116599199 | 8 | 30792 | 0.0121354 | 5.19E-10 | eqtl-a-ENSG00000160789 | rs2293889 | G | T | 0.600603 | TRUE | reported | igd | 38.5991278 | ENSG00000160789 | LMNA |
| 416 | -0.088695 | 127009395 | 9 | 31569 | 0.015833 | 2.12E-08 | eqtl-a-ENSG00000160789 | rs55793580 | T | C | 0.169838 | TRUE | reported | igd | 31.3793785 | ENSG00000160789 | LMNA |
| 417 | 0.0842259 | 270715 | 11 | 31569 | 0.0140201 | 1.89E-09 | eqtl-a-ENSG00000160789 | rs17655730 | C | T | 0.234959 | TRUE | reported | igd | 36.0878977 | ENSG00000160789 | LMNA |
| 418 | -0.0910625 | 112072424 | 12 | 31185 | 0.0122337 | 9.78E-14 | eqtl-a-ENSG00000160789 | rs11065987 | G | A | 0.380678 | TRUE | reported | igd | 55.4032998 | ENSG00000160789 | LMNA |
| 419 | 0.0865998 | 48887268 | 20 | 31684 | 0.014832 | 5.26E-09 | eqtl-a-ENSG00000160789 | rs17196752 | T | C | 0.20106 | TRUE | reported | igd | 34.0884245 | ENSG00000160789 | LMNA |
| 420 | -0.444501 | 45618685 | 1 | 26181 | 0.0179731 | 4.89E-135 | eqtl-a-ENSG00000162415 | rs1152020 | G | A | 0.119348 | TRUE | reported | igd | 611.598379 | ENSG00000162415 | ZSWIM5 |
| 421 | -0.291184 | 45327163 | 1 | 19151 | 0.0395061 | 1.70E-13 | eqtl-a-ENSG00000162415 | rs72674074 | T | C | 0.0231453 | TRUE | reported | igd | 54.3201976 | ENSG00000162415 | ZSWIM5 |
| 422 | 0.255045 | 61122317 | 2 | 31526 | 0.01586 | 3.47E-58 | eqtl-a-ENSG00000162924 | rs34023434 | T | C | 0.165773 | TRUE | reported | igd | 258.582845 | ENSG00000162924 | REL |
| 423 | -0.286642 | 109413810 | 2 | 31491 | 0.0247356 | 4.73E-31 | eqtl-a-ENSG00000163006 | rs10211606 | A | G | 0.0610804 | TRUE | reported | igd | 134.278713 | ENSG00000163006 | CCDC138 |
| 424 | -0.199571 | 97501632 | 2 | 31470 | 0.0232902 | 1.04E-17 | eqtl-a-ENSG00000163126 | rs59244622 | T | C | 0.0698448 | TRUE | reported | igd | 73.4210903 | ENSG00000163126 | ANKRD23 |
| 425 | 0.146806 | 71920869 | 3 | 31566 | 0.0118449 | 2.82E-35 | eqtl-a-ENSG00000163421 | rs2322167 | G | A | 0.515439 | TRUE | reported | igd | 153.602151 | ENSG00000163421 | PROK2 |
| 426 | -0.0709082 | 101267385 | 3 | 31569 | 0.0124632 | 1.27E-08 | eqtl-a-ENSG00000163421 | rs13062095 | C | T | 0.350092 | TRUE | reported | igd | 32.3672855 | ENSG00000163421 | PROK2 |
| 427 | 0.709489 | 71781701 | 3 | 31240 | 0.0170971 | 1.00E-200 | eqtl-a-ENSG00000163421 | rs4677042 | G | C | 0.12318 | TRUE | reported | igd | 1721.94242 | ENSG00000163421 | PROK2 |
| 428 | 0.286243 | 71841375 | 3 | 31148 | 0.0122589 | 1.38E-120 | eqtl-a-ENSG00000163421 | rs6763723 | T | A | 0.651824 | TRUE | reported | igd | 545.178673 | ENSG00000163421 | PROK2 |
| 429 | 0.0704853 | 148200011 | 5 | 31569 | 0.0120527 | 4.97E-09 | eqtl-a-ENSG00000163421 | rs56330463 | C | T | 0.582097 | TRUE | reported | igd | 34.1980149 | ENSG00000163421 | PROK2 |
| 430 | 0.113007 | 173205318 | 5 | 31569 | 0.0137056 | 1.65E-16 | eqtl-a-ENSG00000163421 | rs2594836 | A | G | 0.749651 | TRUE | reported | igd | 67.9809253 | ENSG00000163421 | PROK2 |
| 431 | -0.167192 | 28724374 | 7 | 31355 | 0.0130517 | 1.44E-37 | eqtl-a-ENSG00000163421 | rs56388170 | T | G | 0.289189 | TRUE | reported | igd | 164.085089 | ENSG00000163421 | PROK2 |
| 432 | -0.110817 | 50370254 | 7 | 30077 | 0.0166555 | 2.86E-11 | eqtl-a-ENSG00000163421 | rs149007767 | T | C | 0.149708 | TRUE | reported | igd | 44.2658235 | ENSG00000163421 | PROK2 |
| 433 | -0.0849899 | 61650831 | 8 | 31569 | 0.0155312 | 4.44E-08 | eqtl-a-ENSG00000163421 | rs7846314 | T | A | 0.178349 | TRUE | reported | igd | 29.9431232 | ENSG00000163421 | PROK2 |
| 434 | -0.0786742 | 126523523 | 8 | 30856 | 0.0118856 | 3.61E-11 | eqtl-a-ENSG00000163421 | rs4360309 | T | C | 0.495365 | TRUE | reported | igd | 43.8121231 | ENSG00000163421 | PROK2 |
| 435 | -0.194785 | 7742601 | 17 | 26244 | 0.0343464 | 1.42E-08 | eqtl-a-ENSG00000163421 | rs74480102 | A | G | 0.0309155 | TRUE | reported | igd | 32.1599581 | ENSG00000163421 | PROK2 |
| 436 | 0.0964991 | 38128648 | 17 | 31684 | 0.0119232 | 5.81E-16 | eqtl-a-ENSG00000163421 | rs3859192 | T | C | 0.455547 | TRUE | reported | igd | 65.4988165 | ENSG00000163421 | PROK2 |
| 437 | -0.134926 | 33801280 | 3 | 31565 | 0.0134846 | 1.43E-23 | eqtl-a-ENSG00000163539 | rs4402882 | C | A | 0.262174 | TRUE | reported | igd | 100.112345 | ENSG00000163539 | CLASP2 |
| 438 | 0.185287 | 204800126 | 2 | 31568 | 0.014571 | 4.81E-37 | eqtl-a-ENSG00000163600 | rs11571305 | A | G | 0.208376 | TRUE | reported | igd | 161.690188 | ENSG00000163600 | ICOS |
| 439 | -0.0846102 | 204816382 | 2 | 27978 | 0.0135448 | 4.19E-10 | eqtl-a-ENSG00000163600 | rs4355090 | G | A | 0.260315 | TRUE | reported | igd | 39.0183772 | ENSG00000163600 | ICOS |
| 440 | 0.115631 | 90976768 | 6 | 29113 | 0.0162823 | 1.23E-12 | eqtl-a-ENSG00000163600 | rs72928038 | A | G | 0.158151 | TRUE | reported | igd | 50.4297973 | ENSG00000163600 | ICOS |
| 441 | 0.368493 | 156433902 | 3 | 31315 | 0.0294453 | 6.21E-36 | eqtl-a-ENSG00000163659 | rs344059 | A | G | 0.957812 | TRUE | reported | igd | 156.602532 | ENSG00000163659 | TIPARP |
| 442 | -0.359205 | 156393007 | 3 | 23469 | 0.0482621 | 9.86E-14 | eqtl-a-ENSG00000163659 | rs114679164 | T | C | 0.0153855 | TRUE | reported | igd | 55.3905024 | ENSG00000163659 | TIPARP |
| 443 | -0.167173 | 127009395 | 9 | 31569 | 0.015788 | 3.37E-26 | eqtl-a-ENSG00000163659 | rs55793580 | T | C | 0.169838 | TRUE | reported | igd | 112.111593 | ENSG00000163659 | TIPARP |
| 444 | 0.0825282 | 8208244 | 12 | 31684 | 0.0126306 | 6.40E-11 | eqtl-a-ENSG00000163659 | rs11057065 | T | C | 0.669185 | TRUE | reported | igd | 42.6903158 | ENSG00000163659 | TIPARP |
| 445 | 0.0904245 | 111973358 | 12 | 28089 | 0.0118926 | 2.89E-14 | eqtl-a-ENSG00000163659 | rs597808 | G | A | 0.52377 | TRUE | reported | igd | 57.8079654 | ENSG00000163659 | TIPARP |
| 446 | 0.103872 | 185351651 | 3 | 31465 | 0.0124767 | 8.42E-17 | eqtl-a-ENSG00000163904 | rs1816959 | G | A | 0.346527 | TRUE | reported | igd | 69.3058535 | ENSG00000163904 | SENP2 |
| 447 | -0.213224 | 196230791 | 3 | 24917 | 0.012844 | 6.88E-62 | eqtl-a-ENSG00000163961 | rs9837772 | T | G | 0.698459 | TRUE | reported | igd | 275.573034 | ENSG00000163961 | RNF168 |
| 448 | -0.325442 | 48556339 | 3 | 31682 | 0.0130754 | 9.59E-137 | eqtl-a-ENSG00000164048 | rs2267846 | A | G | 0.27303 | TRUE | reported | igd | 619.455077 | ENSG00000164048 | ZNF589 |
| 449 | 0.667171 | 47905904 | 3 | 18812 | 0.0522538 | 2.48E-37 | eqtl-a-ENSG00000164048 | rs142724087 | C | T | 0.0129941 | TRUE | reported | igd | 163.001796 | ENSG00000164048 | ZNF589 |
| 450 | -0.589624 | 47587905 | 3 | 30817 | 0.0117114 | 1.00E-200 | eqtl-a-ENSG00000164048 | rs11917071 | G | A | 0.67621 | TRUE | reported | igd | 2534.57117 | ENSG00000164048 | ZNF589 |
| 451 | 0.603473 | 153580904 | 5 | 31355 | 0.0257465 | 1.71E-121 | eqtl-a-ENSG00000164574 | rs889025 | C | A | 0.945605 | TRUE | reported | igd | 549.35311 | ENSG00000164574 | GALNT10 |
| 452 | 0.239924 | 153609970 | 5 | 29236 | 0.0339197 | 1.51E-12 | eqtl-a-ENSG00000164574 | rs116133784 | A | G | 0.0316833 | TRUE | reported | igd | 50.028061 | ENSG00000164574 | GALNT10 |
| 453 | 0.318792 | 153486471 | 5 | 29470 | 0.0226346 | 4.75E-45 | eqtl-a-ENSG00000164574 | rs72806649 | T | A | 0.0736011 | TRUE | reported | igd | 198.353426 | ENSG00000164574 | GALNT10 |
| 454 | -0.317036 | 153358290 | 5 | 27739 | 0.0434195 | 2.84E-13 | eqtl-a-ENSG00000164574 | rs148030448 | C | T | 0.0190831 | TRUE | reported | igd | 53.310924 | ENSG00000164574 | GALNT10 |
| 455 | 0.213607 | 41839268 | 6 | 14261 | 0.0140216 | 2.10E-52 | eqtl-a-ENSG00000164663 | rs2149275 | A | T | 0.230296 | TRUE | reported | igd | 232.046436 | ENSG00000164663 | USP49 |
| 456 | -0.11988 | 50199883 | 14 | 25690 | 0.0134206 | 4.16E-19 | eqtl-a-ENSG00000165506 | rs12890086 | A | G | 0.266695 | TRUE | reported | igd | 79.7839974 | ENSG00000165506 | DNAAF2 |
| 457 | 0.0999935 | 101267385 | 3 | 9188 | 0.0124491 | 9.57E-16 | eqtl-a-ENSG00000165591 | rs13062095 | C | T | 0.350092 | TRUE | reported | igd | 64.5019855 | ENSG00000165591 | FAAH2 |
| 458 | -0.249007 | 76986308 | 18 | 31567 | 0.0149244 | 1.70E-62 | eqtl-a-ENSG00000166377 | rs59801029 | T | C | 0.193341 | TRUE | reported | igd | 278.3568 | ENSG00000166377 | ATP9B |
| 459 | 0.223864 | 76701830 | 18 | 16867 | 0.0327052 | 7.66E-12 | eqtl-a-ENSG00000166377 | rs76458255 | A | G | 0.0341757 | TRUE | reported | igd | 46.8471743 | ENSG00000166377 | ATP9B |
| 460 | 0.429656 | 76788677 | 18 | 31568 | 0.0114027 | 1.00E-200 | eqtl-a-ENSG00000166377 | rs12962127 | C | A | 0.549579 | TRUE | reported | igd | 1419.70741 | ENSG00000166377 | ATP9B |
| 461 | 0.101896 | 77164385 | 18 | 18795 | 0.011879 | 9.67E-18 | eqtl-a-ENSG00000166377 | rs8091347 | C | G | 0.516436 | TRUE | reported | igd | 73.5712764 | ENSG00000166377 | ATP9B |
| 462 | 0.0717537 | 129702842 | 9 | 31231 | 0.0120509 | 2.61E-09 | eqtl-a-ENSG00000167094 | rs11790018 | G | C | 0.418202 | TRUE | reported | igd | 35.4504558 | ENSG00000167094 | TTC16 |
| 463 | 0.401776 | 130478653 | 9 | 31678 | 0.0114467 | 1.00E-200 | eqtl-a-ENSG00000167094 | rs3802357 | A | G | 0.463218 | TRUE | reported | igd | 1231.91278 | ENSG00000167094 | TTC16 |
| 464 | 0.0875003 | 128380974 | 11 | 31300 | 0.0142168 | 7.53E-10 | eqtl-a-ENSG00000167094 | rs11221332 | T | C | 0.225758 | TRUE | reported | igd | 37.878051 | ENSG00000167094 | TTC16 |
| 465 | 0.0767707 | 10560957 | 12 | 31300 | 0.012622 | 1.18E-09 | eqtl-a-ENSG00000167094 | rs2617170 | C | T | 0.668027 | TRUE | reported | igd | 36.9919221 | ENSG00000167094 | TTC16 |
| 466 | -0.098633 | 3825278 | 11 | 31553 | 0.0178399 | 3.22E-08 | eqtl-a-ENSG00000167325 | rs1530893 | C | A | 0.872743 | TRUE | reported | igd | 30.5655437 | ENSG00000167325 | RRM1 |
| 467 | -0.164103 | 4329865 | 11 | 22358 | 0.0244034 | 1.76E-11 | eqtl-a-ENSG00000167325 | rs55860918 | T | C | 0.0632992 | TRUE | reported | igd | 45.2161429 | ENSG00000167325 | RRM1 |
| 468 | 0.483386 | 3932027 | 11 | 31560 | 0.012021 | 1.00E-200 | eqtl-a-ENSG00000167325 | rs12295138 | C | T | 0.326619 | TRUE | reported | igd | 1616.88607 | ENSG00000167325 | RRM1 |
| 469 | 0.328871 | 4116335 | 11 | 28165 | 0.0207157 | 9.38E-57 | eqtl-a-ENSG00000167325 | rs12801088 | C | A | 0.910979 | TRUE | reported | igd | 252.011925 | ENSG00000167325 | RRM1 |
| 470 | 0.0732467 | 148200011 | 5 | 14263 | 0.0120515 | 1.22E-09 | eqtl-a-ENSG00000167552 | rs56330463 | C | T | 0.582097 | TRUE | reported | igd | 36.9345671 | ENSG00000167552 | TUBA1A |
| 471 | 0.428831 | 49515130 | 12 | 10382 | 0.0400953 | 1.07E-26 | eqtl-a-ENSG00000167552 | rs11168868 | C | T | 0.0223571 | TRUE | reported | igd | 114.367266 | ENSG00000167552 | TUBA1A |
| 472 | 0.150827 | 39149867 | 3 | 26487 | 0.0144046 | 1.18E-25 | eqtl-a-ENSG00000168026 | rs28362640 | C | G | 0.216106 | TRUE | reported | igd | 109.628377 | ENSG00000168026 | TTC21A |
| 473 | -0.359785 | 39149180 | 3 | 26609 | 0.0153983 | 9.62E-121 | eqtl-a-ENSG00000168026 | rs6786855 | G | A | 0.17417 | TRUE | reported | igd | 545.893482 | ENSG00000168026 | TTC21A |
| 474 | 0.0781408 | 111884608 | 12 | 23343 | 0.0119277 | 5.71E-11 | eqtl-a-ENSG00000168026 | rs3184504 | C | T | 0.542056 | TRUE | reported | igd | 42.9146011 | ENSG00000168026 | TTC21A |
| 475 | 0.0932918 | 13279493 | 18 | 25571 | 0.0120144 | 8.16E-15 | eqtl-a-ENSG00000168675 | rs11080641 | A | T | 0.575085 | TRUE | reported | igd | 60.2904884 | ENSG00000168675 | LDLRAD4 |
| 476 | 0.277239 | 13471199 | 18 | 25690 | 0.0118058 | 6.05E-122 | eqtl-a-ENSG00000168675 | rs8084766 | T | C | 0.42651 | TRUE | reported | igd | 551.421877 | ENSG00000168675 | LDLRAD4 |
| 477 | 0.132138 | 15676565 | 3 | 31186 | 0.0135689 | 2.07E-22 | eqtl-a-ENSG00000169814 | rs2471807 | A | G | 0.257338 | TRUE | reported | igd | 94.8283779 | ENSG00000169814 | BTD |
| 478 | -0.331537 | 111486738 | 11 | 31300 | 0.0126886 | 1.73E-150 | eqtl-a-ENSG00000170145 | rs567859 | G | A | 0.700324 | TRUE | reported | igd | 682.666893 | ENSG00000170145 | SIK2 |
| 479 | 1.03428 | 103015946 | 7 | 28916 | 0.0273611 | 1.00E-200 | eqtl-a-ENSG00000170615 | rs77732739 | C | T | 0.0449919 | TRUE | reported | igd | 1428.82522 | ENSG00000170615 | SLC26A5 |
| 480 | -0.106816 | 103124523 | 7 | 30312 | 0.0131441 | 4.41E-16 | eqtl-a-ENSG00000170615 | rs2906643 | C | T | 0.285709 | TRUE | reported | igd | 66.0362277 | ENSG00000170615 | SLC26A5 |
| 481 | 0.1451 | 125455992 | 8 | 14263 | 0.0151081 | 7.69E-22 | eqtl-a-ENSG00000170881 | rs7009847 | A | G | 0.190458 | TRUE | reported | igd | 92.2261801 | ENSG00000170881 | RNF139 |
| 482 | 0.361803 | 79696008 | 8 | 23411 | 0.0492483 | 2.04E-13 | eqtl-a-ENSG00000171033 | rs76768622 | A | C | 0.0147676 | TRUE | reported | igd | 53.9665601 | ENSG00000171033 | PKIA |
| 483 | 0.225404 | 78997818 | 8 | 27588 | 0.0407823 | 3.26E-08 | eqtl-a-ENSG00000171033 | rs118004663 | T | G | 0.0217243 | TRUE | reported | igd | 30.5455762 | ENSG00000171033 | PKIA |
| 484 | -0.285144 | 79798200 | 8 | 21842 | 0.0399344 | 9.31E-13 | eqtl-a-ENSG00000171033 | rs76870384 | T | C | 0.0226452 | TRUE | reported | igd | 50.97936 | ENSG00000171033 | PKIA |
| 485 | 0.208202 | 79154295 | 8 | 28178 | 0.0334285 | 4.72E-10 | eqtl-a-ENSG00000171033 | rs117168102 | T | G | 0.032681 | TRUE | reported | igd | 38.7886968 | ENSG00000171033 | PKIA |
| 486 | -0.66064 | 78722326 | 8 | 25370 | 0.0379619 | 7.86E-68 | eqtl-a-ENSG00000171033 | rs117144803 | C | T | 0.0246731 | TRUE | reported | igd | 302.830498 | ENSG00000171033 | PKIA |
| 487 | -0.670249 | 79691486 | 8 | 24545 | 0.0403121 | 4.47E-62 | eqtl-a-ENSG00000171033 | rs143611100 | C | T | 0.0218571 | TRUE | reported | igd | 276.417869 | ENSG00000171033 | PKIA |
| 488 | -0.79004 | 79200188 | 8 | 30220 | 0.0209504 | 1.00E-200 | eqtl-a-ENSG00000171033 | rs34268188 | G | A | 0.0796656 | TRUE | reported | igd | 1421.95148 | ENSG00000171033 | PKIA |
| 489 | -1.02775 | 79428508 | 8 | 27571 | 0.0370292 | 1.51E-169 | eqtl-a-ENSG00000171033 | rs78445112 | T | G | 0.0251289 | TRUE | reported | igd | 770.290971 | ENSG00000171033 | PKIA |
| 490 | 0.0964341 | 99192919 | 9 | 24814 | 0.0139743 | 5.18E-12 | eqtl-a-ENSG00000171033 | rs10820606 | C | A | 0.236914 | TRUE | reported | igd | 47.6174498 | ENSG00000171033 | PKIA |
| 491 | 0.126141 | 58249643 | 19 | 30222 | 0.0151024 | 6.69E-17 | eqtl-a-ENSG00000171033 | rs12973620 | C | G | 0.191043 | TRUE | reported | igd | 69.757653 | ENSG00000171033 | PKIA |
| 492 | -0.0674441 | 116599199 | 8 | 30792 | 0.0121388 | 2.76E-08 | eqtl-a-ENSG00000171208 | rs2293889 | G | T | 0.600603 | TRUE | reported | igd | 30.8679797 | ENSG00000171208 | NETO2 |
| 493 | -0.195273 | 47054089 | 16 | 31231 | 0.0256831 | 2.89E-14 | eqtl-a-ENSG00000171208 | rs8058714 | T | G | 0.943302 | TRUE | reported | igd | 57.8045066 | ENSG00000171208 | NETO2 |
| 494 | 0.182496 | 57798189 | 4 | 31684 | 0.0147098 | 2.41E-35 | eqtl-a-ENSG00000171723 | rs2227901 | A | G | 0.203258 | TRUE | reported | igd | 153.909614 | ENSG00000171723 | GPHN |
| 495 | 0.133058 | 67187178 | 14 | 30162 | 0.0141968 | 7.10E-21 | eqtl-a-ENSG00000171723 | rs56228899 | G | A | 0.225535 | TRUE | reported | igd | 87.8359405 | ENSG00000171723 | GPHN |
| 496 | -0.276658 | 67513150 | 14 | 24125 | 0.0455239 | 1.22E-09 | eqtl-a-ENSG00000171723 | rs117928445 | G | A | 0.0173491 | TRUE | reported | igd | 36.9293394 | ENSG00000171723 | GPHN |
| 497 | -0.123105 | 38167971 | 19 | 31684 | 0.0145683 | 2.91E-17 | eqtl-a-ENSG00000171817 | rs11672077 | T | C | 0.210286 | TRUE | reported | igd | 71.4013162 | ENSG00000171817 | ZNF540 |
| 498 | -0.0770095 | 71151540 | 11 | 31315 | 0.0136002 | 1.49E-08 | eqtl-a-ENSG00000172893 | rs10898144 | T | A | 0.257266 | TRUE | reported | igd | 32.0604991 | ENSG00000172893 | DHCR7 |
| 499 | 0.15021 | 121073773 | 3 | 27277 | 0.0261548 | 9.30E-09 | eqtl-a-ENSG00000173226 | rs9862165 | T | G | 0.0546485 | TRUE | reported | igd | 32.9809409 | ENSG00000173226 | IQCB1 |
| 500 | 0.655289 | 121344140 | 3 | 31086 | 0.0121422 | 1.00E-200 | eqtl-a-ENSG00000173226 | rs3772130 | G | A | 0.274547 | TRUE | reported | igd | 2912.34653 | ENSG00000173226 | IQCB1 |
| 501 | -0.391559 | 121861237 | 3 | 31025 | 0.0299726 | 5.29E-39 | eqtl-a-ENSG00000173226 | rs113828503 | T | C | 0.0406092 | TRUE | reported | igd | 170.654439 | ENSG00000173226 | IQCB1 |
| 502 | -0.247796 | 122016301 | 3 | 27914 | 0.0318697 | 7.52E-15 | eqtl-a-ENSG00000173226 | rs116506625 | T | C | 0.0360257 | TRUE | reported | igd | 60.4507251 | ENSG00000173226 | IQCB1 |
| 503 | 0.272058 | 121447911 | 3 | 31470 | 0.0169234 | 3.78E-58 | eqtl-a-ENSG00000173226 | rs1919554 | C | A | 0.141475 | TRUE | reported | igd | 258.416453 | ENSG00000173226 | IQCB1 |
| 504 | 0.136828 | 94852628 | 12 | 26280 | 0.0201701 | 1.17E-11 | eqtl-a-ENSG00000173588 | rs10859698 | A | G | 0.0960046 | TRUE | reported | igd | 46.0151458 | ENSG00000173588 | CEP83 |
| 505 | 0.121408 | 94643094 | 12 | 25827 | 0.016705 | 3.65E-13 | eqtl-a-ENSG00000173588 | rs2054723 | T | C | 0.148527 | TRUE | reported | igd | 52.8163053 | ENSG00000173588 | CEP83 |
| 506 | -0.204954 | 94713800 | 12 | 26487 | 0.0127984 | 1.02E-57 | eqtl-a-ENSG00000173588 | rs2365453 | A | G | 0.306094 | TRUE | reported | igd | 256.429889 | ENSG00000173588 | CEP83 |
| 507 | -0.08124 | 43359061 | 2 | 21405 | 0.0135495 | 2.02E-09 | eqtl-a-ENSG00000174007 | rs12466022 | A | C | 0.260124 | TRUE | reported | igd | 35.9461771 | ENSG00000174007 | CEP19 |
| 508 | 0.521275 | 196432167 | 3 | 25690 | 0.0129239 | 1.00E-200 | eqtl-a-ENSG00000174007 | rs2030534 | G | A | 0.255384 | TRUE | reported | igd | 1626.71999 | ENSG00000174007 | CEP19 |
| 509 | -0.279672 | 196438744 | 3 | 25688 | 0.0203159 | 4.07E-43 | eqtl-a-ENSG00000174007 | rs7629566 | G | A | 0.0934153 | TRUE | reported | igd | 189.492502 | ENSG00000174007 | CEP19 |
| 510 | 0.119813 | 196682028 | 3 | 24908 | 0.0133759 | 3.32E-19 | eqtl-a-ENSG00000174007 | rs557247 | C | T | 0.730495 | TRUE | reported | igd | 80.2281883 | ENSG00000174007 | CEP19 |
| 511 | 0.0727132 | 196351663 | 3 | 25690 | 0.0125847 | 7.56E-09 | eqtl-a-ENSG00000174007 | rs1684456 | G | A | 0.663892 | TRUE | reported | igd | 33.3815862 | ENSG00000174007 | CEP19 |
| 512 | -0.148932 | 144385777 | 6 | 19741 | 0.0266283 | 2.23E-08 | eqtl-a-ENSG00000174007 | rs149110519 | T | C | 0.0526158 | TRUE | reported | igd | 31.2784454 | ENSG00000174007 | CEP19 |
| 513 | 0.593791 | 36269996 | 14 | 14263 | 0.0169663 | 1.00E-200 | eqtl-a-ENSG00000174373 | rs12895863 | G | A | 0.13018 | TRUE | reported | igd | 1224.70654 | ENSG00000174373 | RALGAPA1 |
| 514 | -0.109588 | 66012443 | 15 | 31047 | 0.0119895 | 6.22E-20 | eqtl-a-ENSG00000174485 | rs8042366 | T | A | 0.429117 | TRUE | reported | igd | 83.5402712 | ENSG00000174485 | DENND4A |
| 515 | 0.102739 | 50370254 | 7 | 30077 | 0.0166592 | 6.96E-10 | eqtl-a-ENSG00000175197 | rs149007767 | T | C | 0.149708 | TRUE | reported | igd | 38.0306287 | ENSG00000175197 | DDIT3 |
| 516 | 0.0844699 | 959111 | 10 | 31569 | 0.014561 | 6.59E-09 | eqtl-a-ENSG00000175197 | rs12264390 | C | T | 0.21134 | TRUE | reported | igd | 33.6506952 | ENSG00000175197 | DDIT3 |
| 517 | 0.27203 | 57911160 | 12 | 28917 | 0.0167901 | 4.90E-59 | eqtl-a-ENSG00000175197 | rs697221 | A | G | 0.144136 | TRUE | reported | igd | 262.480473 | ENSG00000175197 | DDIT3 |
| 518 | 0.176465 | 41757647 | 22 | 9188 | 0.0141951 | 1.77E-35 | eqtl-a-ENSG00000175556 | rs4822024 | A | G | 0.224124 | TRUE | reported | igd | 154.506126 | ENSG00000175556 | LONRF3 |
| 519 | 0.0725162 | 50427982 | 7 | 30935 | 0.011949 | 1.29E-09 | eqtl-a-ENSG00000175931 | rs6592965 | A | G | 0.449532 | TRUE | reported | igd | 36.8280628 | ENSG00000175931 | UBE2O |
| 520 | 0.279753 | 74413449 | 17 | 30935 | 0.0121801 | 9.71E-117 | eqtl-a-ENSG00000175931 | rs394873 | A | G | 0.640817 | TRUE | reported | igd | 527.496665 | ENSG00000175931 | UBE2O |
| 521 | 0.156685 | 11297258 | 19 | 30820 | 0.0244618 | 1.50E-10 | eqtl-a-ENSG00000175931 | rs12974711 | C | T | 0.0629954 | TRUE | reported | igd | 41.0251179 | ENSG00000175931 | UBE2O |
| 522 | 0.0687105 | 4157072 | 20 | 30820 | 0.0123394 | 2.57E-08 | eqtl-a-ENSG00000175931 | rs6084653 | G | C | 0.36636 | TRUE | reported | igd | 31.0048724 | ENSG00000175931 | UBE2O |
| 523 | -0.0682353 | 56849749 | 3 | 31470 | 0.0122369 | 2.46E-08 | eqtl-a-ENSG00000176095 | rs1354034 | C | T | 0.618137 | TRUE | reported | igd | 31.0919376 | ENSG00000176095 | IP6K1 |
| 524 | -0.149562 | 144385777 | 6 | 25521 | 0.026628 | 1.95E-08 | eqtl-a-ENSG00000176095 | rs149110519 | T | C | 0.0526158 | TRUE | reported | igd | 31.5450628 | ENSG00000176095 | IP6K1 |
| 525 | 0.0935611 | 50370254 | 7 | 29863 | 0.016663 | 1.97E-08 | eqtl-a-ENSG00000176095 | rs149007767 | T | C | 0.149708 | TRUE | reported | igd | 31.5250049 | ENSG00000176095 | IP6K1 |
| 526 | 0.191447 | 43925988 | 19 | 21627 | 0.0334586 | 1.05E-08 | eqtl-a-ENSG00000176531 | rs75745949 | A | G | 0.0326345 | TRUE | reported | igd | 32.7371928 | ENSG00000176531 | PHLDB3 |
| 527 | 1.00336 | 43968269 | 19 | 26180 | 0.0199786 | 1.00E-200 | eqtl-a-ENSG00000176531 | rs79297807 | G | A | 0.0820217 | TRUE | reported | igd | 2522.03021 | ENSG00000176531 | PHLDB3 |
| 528 | 0.412111 | 43971557 | 19 | 13665 | 0.0536623 | 1.60E-14 | eqtl-a-ENSG00000176531 | rs148493345 | T | G | 0.012404 | TRUE | reported | igd | 58.9693418 | ENSG00000176531 | PHLDB3 |
| 529 | -0.198697 | 44073269 | 19 | 21840 | 0.0143321 | 1.05E-43 | eqtl-a-ENSG00000176531 | rs2682564 | A | G | 0.782603 | TRUE | reported | igd | 192.186637 | ENSG00000176531 | PHLDB3 |
| 530 | -0.0949553 | 1959822 | 17 | 30817 | 0.0120242 | 2.86E-15 | eqtl-a-ENSG00000177374 | rs9901806 | T | C | 0.577927 | TRUE | reported | igd | 62.3588147 | ENSG00000177374 | HIC1 |
| 531 | 0.0699516 | 48795162 | 12 | 18917 | 0.0120552 | 6.52E-09 | eqtl-a-ENSG00000177875 | rs7304474 | C | T | 0.582661 | TRUE | reported | igd | 33.6666999 | ENSG00000177875 | CCDC184 |
| 532 | 0.269445 | 158293893 | 3 | 14261 | 0.0156563 | 2.24E-66 | eqtl-a-ENSG00000178053 | rs10936149 | G | T | 0.170674 | TRUE | reported | igd | 296.142732 | ENSG00000178053 | MLF1 |
| 533 | 0.276961 | 149861604 | 6 | 21005 | 0.0155495 | 5.74E-71 | eqtl-a-ENSG00000178199 | rs9406344 | G | A | 0.173329 | TRUE | reported | igd | 317.221801 | ENSG00000178199 | ZC3H12D |
| 534 | -0.227445 | 241495633 | 2 | 30482 | 0.0182549 | 1.24E-35 | eqtl-a-ENSG00000178623 | rs72999907 | A | G | 0.119399 | TRUE | reported | igd | 155.226325 | ENSG00000178623 | GPR35 |
| 535 | 0.39342 | 241571858 | 2 | 26463 | 0.0114454 | 1.00E-200 | eqtl-a-ENSG00000178623 | rs2975788 | G | A | 0.478226 | TRUE | reported | igd | 1181.45747 | ENSG00000178623 | GPR35 |
| 536 | -0.111251 | 241574401 | 2 | 26098 | 0.0118764 | 7.43E-21 | eqtl-a-ENSG00000178623 | rs4676408 | A | G | 0.520255 | TRUE | reported | igd | 87.741475 | ENSG00000178623 | GPR35 |
| 537 | -0.372348 | 123988924 | 8 | 31525 | 0.0120196 | 1.00E-200 | eqtl-a-ENSG00000178764 | rs7819302 | T | C | 0.642884 | TRUE | reported | igd | 959.600504 | ENSG00000178764 | ZHX2 |
| 538 | 0.0870783 | 124056914 | 8 | 31644 | 0.0131193 | 3.20E-11 | eqtl-a-ENSG00000178764 | rs4871340 | C | T | 0.288267 | TRUE | reported | igd | 44.0525556 | ENSG00000178764 | ZHX2 |
| 539 | 0.0678593 | 182323766 | 2 | 31355 | 0.011992 | 1.52E-08 | eqtl-a-ENSG00000179820 | rs1375493 | A | G | 0.565077 | TRUE | reported | igd | 32.0190033 | ENSG00000179820 | MYADM |
| 540 | 0.0735352 | 148200011 | 5 | 31355 | 0.0120514 | 1.05E-09 | eqtl-a-ENSG00000179820 | rs56330463 | C | T | 0.582097 | TRUE | reported | igd | 37.2295554 | ENSG00000179820 | MYADM |
| 541 | 0.140833 | 50370254 | 7 | 29863 | 0.0166394 | 2.59E-17 | eqtl-a-ENSG00000179820 | rs149007767 | T | C | 0.149708 | TRUE | reported | igd | 71.6315668 | ENSG00000179820 | MYADM |
| 542 | 0.0743336 | 144993377 | 8 | 23692 | 0.0120728 | 7.41E-10 | eqtl-a-ENSG00000179820 | rs6992333 | G | A | 0.41274 | TRUE | reported | igd | 37.9068466 | ENSG00000179820 | MYADM |
| 543 | -0.251176 | 127009395 | 9 | 31355 | 0.015709 | 1.51E-57 | eqtl-a-ENSG00000179820 | rs55793580 | T | C | 0.169838 | TRUE | reported | igd | 255.641583 | ENSG00000179820 | MYADM |
| 544 | 0.163472 | 111904371 | 12 | 28203 | 0.0118469 | 2.60E-43 | eqtl-a-ENSG00000179820 | rs4766578 | A | T | 0.531061 | TRUE | reported | igd | 190.391041 | ENSG00000179820 | MYADM |
| 545 | -0.21079 | 54393744 | 19 | 20238 | 0.034801 | 1.39E-09 | eqtl-a-ENSG00000179820 | rs10405498 | T | C | 0.0300774 | TRUE | reported | igd | 36.6837428 | ENSG00000179820 | MYADM |
| 546 | 0.103562 | 240850649 | 1 | 30902 | 0.0158977 | 7.31E-11 | eqtl-a-ENSG00000180875 | rs10926332 | G | A | 0.167944 | TRUE | reported | igd | 42.4330408 | ENSG00000180875 | GREM2 |
| 547 | -0.0916977 | 240775103 | 1 | 28588 | 0.0147429 | 4.98E-10 | eqtl-a-ENSG00000180875 | rs3748533 | T | C | 0.795751 | TRUE | reported | igd | 38.6830458 | ENSG00000180875 | GREM2 |
| 548 | 0.194517 | 240817222 | 1 | 31684 | 0.0118077 | 5.66E-61 | eqtl-a-ENSG00000180875 | rs10926315 | G | T | 0.526852 | TRUE | reported | igd | 271.367035 | ENSG00000180875 | GREM2 |
| 549 | -0.257361 | 151697016 | 6 | 28381 | 0.0306496 | 4.58E-17 | eqtl-a-ENSG00000181472 | rs9383567 | A | T | 0.0390457 | TRUE | reported | igd | 70.5026178 | ENSG00000181472 | ZBTB2 |
| 550 | -0.613261 | 73516934 | 17 | 31565 | 0.0203592 | 2.51E-199 | eqtl-a-ENSG00000182173 | rs7225469 | C | T | 0.911948 | TRUE | reported | igd | 907.280878 | ENSG00000182173 | TSEN54 |
| 551 | 0.0683917 | 103511114 | 4 | 31256 | 0.0124435 | 3.88E-08 | eqtl-a-ENSG00000182463 | rs3774959 | A | G | 0.352643 | TRUE | reported | igd | 30.2060477 | ENSG00000182463 | TSHZ2 |
| 552 | 0.0892735 | 35852311 | 5 | 31256 | 0.0133627 | 2.38E-11 | eqtl-a-ENSG00000182463 | rs6890853 | A | G | 0.27143 | TRUE | reported | igd | 44.6302065 | ENSG00000182463 | TSHZ2 |
| 553 | -0.0739753 | 90936894 | 6 | 31256 | 0.0122162 | 1.40E-09 | eqtl-a-ENSG00000182463 | rs206913 | A | C | 0.615111 | TRUE | reported | igd | 36.6668339 | ENSG00000182463 | TSHZ2 |
| 554 | -0.105438 | 28174986 | 7 | 31256 | 0.0138919 | 3.20E-14 | eqtl-a-ENSG00000182463 | rs67250450 | C | T | 0.24079 | TRUE | reported | igd | 57.6027519 | ENSG00000182463 | TSHZ2 |
| 555 | -0.173123 | 51052902 | 20 | 9188 | 0.0118613 | 2.99E-48 | eqtl-a-ENSG00000182463 | rs1535160 | C | T | 0.455729 | TRUE | reported | igd | 212.985684 | ENSG00000182463 | TSHZ2 |
| 556 | 0.0855514 | 51809918 | 20 | 26174 | 0.0119156 | 6.98E-13 | eqtl-a-ENSG00000182463 | rs35912954 | G | T | 0.462397 | TRUE | reported | igd | 51.5453181 | ENSG00000182463 | TSHZ2 |
| 557 | 0.247236 | 52100468 | 20 | 26178 | 0.0127048 | 2.39E-84 | eqtl-a-ENSG00000182463 | rs2741389 | C | T | 0.690461 | TRUE | reported | igd | 378.664481 | ENSG00000182463 | TSHZ2 |
| 558 | 0.369173 | 51575910 | 20 | 26181 | 0.0234485 | 7.58E-56 | eqtl-a-ENSG00000182463 | rs6013578 | G | A | 0.0679281 | TRUE | reported | igd | 247.854354 | ENSG00000182463 | TSHZ2 |
| 559 | -0.100643 | 66016006 | 17 | 23084 | 0.0138202 | 3.28E-13 | eqtl-a-ENSG00000182481 | rs62086903 | C | T | 0.244599 | TRUE | reported | igd | 53.0274646 | ENSG00000182481 | KPNA2 |
| 560 | -0.27387 | 14975721 | 12 | 31429 | 0.0118469 | 3.10E-118 | eqtl-a-ENSG00000182993 | rs11610238 | T | C | 0.58255 | TRUE | reported | igd | 534.382025 | ENSG00000182993 | C12orf60 |
| 561 | -0.0760223 | 43360065 | 2 | 26953 | 0.0136522 | 2.57E-08 | eqtl-a-ENSG00000183049 | rs28498283 | T | A | 0.254318 | TRUE | reported | igd | 31.0059112 | ENSG00000183049 | CAMK1D |
| 562 | 0.12348 | 50370254 | 7 | 30077 | 0.0166492 | 1.20E-13 | eqtl-a-ENSG00000183049 | rs149007767 | T | C | 0.149708 | TRUE | reported | igd | 55.001891 | ENSG00000183049 | CAMK1D |
| 563 | -0.105057 | 13169066 | 10 | 31684 | 0.0134185 | 4.90E-15 | eqtl-a-ENSG00000183049 | rs17512962 | A | G | 0.267372 | TRUE | reported | igd | 61.29353 | ENSG00000183049 | CAMK1D |
| 564 | -0.435027 | 12241815 | 10 | 31231 | 0.0113552 | 1.00E-200 | eqtl-a-ENSG00000183049 | rs11257593 | G | A | 0.533931 | TRUE | reported | igd | 1467.62478 | ENSG00000183049 | CAMK1D |
| 565 | -0.318244 | 12314473 | 10 | 31567 | 0.0117957 | 2.56E-160 | eqtl-a-ENSG00000183049 | rs11257676 | A | G | 0.411143 | TRUE | reported | igd | 727.856048 | ENSG00000183049 | CAMK1D |
| 566 | 0.206269 | 12867598 | 10 | 31668 | 0.0136577 | 1.55E-51 | eqtl-a-ENSG00000183049 | rs1757051 | G | C | 0.751232 | TRUE | reported | igd | 228.079031 | ENSG00000183049 | CAMK1D |
| 567 | 0.159874 | 54685880 | 12 | 29836 | 0.0256138 | 4.33E-10 | eqtl-a-ENSG00000183049 | rs35979828 | T | C | 0.0571059 | TRUE | reported | igd | 38.9563753 | ENSG00000183049 | CAMK1D |
| 568 | 0.0933334 | 50370254 | 7 | 30077 | 0.0166631 | 2.13E-08 | eqtl-a-ENSG00000183570 | rs149007767 | T | C | 0.149708 | TRUE | reported | igd | 31.371385 | ENSG00000183570 | PCBP3 |
| 569 | 0.202244 | 46743400 | 21 | 21837 | 0.02837 | 1.01E-12 | eqtl-a-ENSG00000183570 | rs117087460 | A | G | 0.0459671 | TRUE | reported | igd | 50.8151068 | ENSG00000183570 | PCBP3 |
| 570 | -0.118402 | 47248981 | 21 | 31684 | 0.012038 | 7.89E-23 | eqtl-a-ENSG00000183570 | rs2839013 | C | T | 0.415029 | TRUE | reported | igd | 96.734632 | ENSG00000183570 | PCBP3 |
| 571 | 0.315953 | 47309957 | 21 | 31562 | 0.0119683 | 1.41E-153 | eqtl-a-ENSG00000183570 | rs4819162 | C | T | 0.380262 | TRUE | reported | igd | 696.871193 | ENSG00000183570 | PCBP3 |
| 572 | -0.0849103 | 86298716 | 15 | 31469 | 0.0123814 | 6.98E-12 | eqtl-a-ENSG00000183655 | rs2614664 | A | G | 0.359666 | TRUE | reported | igd | 47.0276892 | ENSG00000183655 | KLHL25 |
| 573 | -0.0899042 | 38140503 | 6 | 31684 | 0.0120932 | 1.05E-13 | eqtl-a-ENSG00000183826 | rs737170 | T | C | 0.406592 | TRUE | reported | igd | 55.2649875 | ENSG00000183826 | BTBD9 |
| 574 | 0.15189 | 56849749 | 3 | 31684 | 0.0121835 | 1.13E-35 | eqtl-a-ENSG00000184178 | rs1354034 | C | T | 0.618137 | TRUE | reported | igd | 155.41281 | ENSG00000184178 | SCFD2 |
| 575 | -0.389559 | 54137228 | 4 | 31684 | 0.0208805 | 1.12E-77 | eqtl-a-ENSG00000184178 | rs4864453 | A | G | 0.0868315 | TRUE | reported | igd | 348.046509 | ENSG00000184178 | SCFD2 |
| 576 | 0.12023 | 122216910 | 12 | 30031 | 0.0190231 | 2.62E-10 | eqtl-a-ENSG00000184178 | rs11553699 | G | A | 0.10963 | TRUE | reported | igd | 39.9424029 | ENSG00000184178 | SCFD2 |
| 577 | -0.485436 | 99465983 | 3 | 24938 | 0.0116456 | 1.00E-200 | eqtl-a-ENSG00000184220 | rs634861 | A | T | 0.367957 | TRUE | reported | igd | 1737.4223 | ENSG00000184220 | CMSS1 |
| 578 | 0.116554 | 100244677 | 3 | 25476 | 0.015084 | 1.10E-14 | eqtl-a-ENSG00000184220 | rs6780654 | G | A | 0.191834 | TRUE | reported | igd | 59.7017721 | ENSG00000184220 | CMSS1 |
| 579 | -0.118629 | 99050334 | 3 | 24515 | 0.0185219 | 1.51E-10 | eqtl-a-ENSG00000184220 | rs1842631 | A | T | 0.883461 | TRUE | reported | igd | 41.0180714 | ENSG00000184220 | CMSS1 |
| 580 | -0.147779 | 99060484 | 3 | 20748 | 0.0236417 | 4.08E-10 | eqtl-a-ENSG00000184220 | rs4133236 | A | G | 0.067799 | TRUE | reported | igd | 39.0684496 | ENSG00000184220 | CMSS1 |
| 581 | 0.105659 | 38128648 | 17 | 31644 | 0.0119177 | 7.61E-19 | eqtl-a-ENSG00000184557 | rs3859192 | T | C | 0.455547 | TRUE | reported | igd | 78.5960363 | ENSG00000184557 | SOCS3 |
| 582 | 0.183463 | 66697753 | 1 | 31355 | 0.0138119 | 2.91E-40 | eqtl-a-ENSG00000184588 | rs12731764 | G | A | 0.241923 | TRUE | reported | igd | 176.425935 | ENSG00000184588 | PDE4B |
| 583 | -0.185306 | 148200011 | 5 | 31355 | 0.011966 | 4.33E-54 | eqtl-a-ENSG00000184588 | rs56330463 | C | T | 0.582097 | TRUE | reported | igd | 239.802255 | ENSG00000184588 | PDE4B |
| 584 | -0.163891 | 144385777 | 6 | 25521 | 0.026622 | 7.44E-10 | eqtl-a-ENSG00000184588 | rs149110519 | T | C | 0.0526158 | TRUE | reported | igd | 37.8961261 | ENSG00000184588 | PDE4B |
| 585 | 0.552265 | 29709777 | 16 | 31236 | 0.0145604 | 1.00E-200 | eqtl-a-ENSG00000185905 | rs1134700 | T | C | 0.186365 | TRUE | reported | igd | 1438.53562 | ENSG00000185905 | C16orf54 |
| 586 | -0.149813 | 52448290 | 14 | 28673 | 0.0198813 | 4.87E-14 | eqtl-a-ENSG00000186469 | rs7157303 | T | G | 0.0990762 | TRUE | reported | igd | 56.7778771 | ENSG00000186469 | GNG2 |
| 587 | -0.324746 | 52328502 | 14 | 31569 | 0.0189099 | 4.22E-66 | eqtl-a-ENSG00000186469 | rs7145255 | A | G | 0.891107 | TRUE | reported | igd | 294.904664 | ENSG00000186469 | GNG2 |
| 588 | 0.0712933 | 38143548 | 17 | 31683 | 0.0119259 | 2.26E-09 | eqtl-a-ENSG00000186469 | rs4065321 | T | C | 0.539612 | TRUE | reported | igd | 35.7344986 | ENSG00000186469 | GNG2 |
| 589 | 0.160412 | 25350588 | 1 | 31231 | 0.0158191 | 3.66E-24 | eqtl-a-ENSG00000187010 | rs35661205 | G | C | 0.169139 | TRUE | reported | igd | 102.821125 | ENSG00000187010 | RHD |
| 590 | 0.470582 | 25525907 | 1 | 30077 | 0.0120843 | 1.00E-200 | eqtl-a-ENSG00000187010 | rs2375112 | T | C | 0.324054 | TRUE | reported | igd | 1516.34752 | ENSG00000187010 | RHD |
| 591 | 0.222762 | 25463357 | 1 | 28480 | 0.0301095 | 1.38E-13 | eqtl-a-ENSG00000187010 | rs76402153 | T | C | 0.0405683 | TRUE | reported | igd | 54.7324174 | ENSG00000187010 | RHD |
| 592 | -0.758163 | 25683118 | 1 | 20055 | 0.0394782 | 3.37E-82 | eqtl-a-ENSG00000187010 | rs3093654 | G | A | 0.0226636 | TRUE | reported | igd | 368.779842 | ENSG00000187010 | RHD |
| 593 | -0.222262 | 26480725 | 1 | 25767 | 0.0308709 | 6.03E-13 | eqtl-a-ENSG00000187010 | rs116012799 | G | A | 0.0385173 | TRUE | reported | igd | 51.8320211 | ENSG00000187010 | RHD |
| 594 | 0.430285 | 151074015 | 7 | 26162 | 0.0113772 | 1.00E-200 | eqtl-a-ENSG00000187260 | rs2240629 | C | G | 0.538911 | TRUE | reported | igd | 1430.23837 | ENSG00000187260 | WDR86 |
| 595 | -0.534816 | 151095179 | 7 | 19228 | 0.0168069 | 1.00E-200 | eqtl-a-ENSG00000187260 | rs73474467 | T | G | 0.135323 | TRUE | reported | igd | 1012.48448 | ENSG00000187260 | WDR86 |
| 596 | 0.450566 | 151130244 | 7 | 26151 | 0.0200738 | 1.42E-111 | eqtl-a-ENSG00000187260 | rs71539880 | G | C | 0.0936484 | TRUE | reported | igd | 503.760871 | ENSG00000187260 | WDR86 |
| 597 | -0.0972747 | 151270904 | 7 | 26482 | 0.0137446 | 1.47E-12 | eqtl-a-ENSG00000187260 | rs75785240 | A | G | 0.248697 | TRUE | reported | igd | 50.0844362 | ENSG00000187260 | WDR86 |
| 598 | -0.188377 | 30744504 | 22 | 26494 | 0.0142302 | 5.29E-40 | eqtl-a-ENSG00000187860 | rs4820005 | C | T | 0.222126 | TRUE | reported | igd | 175.226973 | ENSG00000187860 | CCDC157 |
| 599 | 0.319837 | 27939937 | 8 | 21396 | 0.0447375 | 8.73E-13 | eqtl-a-ENSG00000189233 | rs182165096 | G | A | 0.0179575 | TRUE | reported | igd | 51.106176 | ENSG00000189233 | NUGGC |
| 600 | -0.381466 | 155996352 | 1 | 24926 | 0.0297793 | 1.44E-37 | eqtl-a-ENSG00000196189 | rs76275105 | T | G | 0.0411818 | TRUE | reported | igd | 164.077055 | ENSG00000196189 | SEMA4A |
| 601 | 0.364817 | 156001168 | 1 | 25823 | 0.0347527 | 8.88E-26 | eqtl-a-ENSG00000196189 | rs115685211 | T | C | 0.0300029 | TRUE | reported | igd | 110.189293 | ENSG00000196189 | SEMA4A |
| 602 | 0.495886 | 156072217 | 1 | 28397 | 0.037013 | 6.24E-41 | eqtl-a-ENSG00000196189 | rs71630614 | T | C | 0.0262199 | TRUE | reported | igd | 179.483501 | ENSG00000196189 | SEMA4A |
| 603 | 0.580836 | 156161085 | 1 | 22007 | 0.0443383 | 3.29E-39 | eqtl-a-ENSG00000196189 | rs111558386 | G | A | 0.0181313 | TRUE | reported | igd | 171.596927 | ENSG00000196189 | SEMA4A |
| 604 | 0.322328 | 155984507 | 1 | 24127 | 0.0407793 | 2.70E-15 | eqtl-a-ENSG00000196189 | rs12119565 | G | A | 0.0216775 | TRUE | reported | igd | 62.4712983 | ENSG00000196189 | SEMA4A |
| 605 | -0.498337 | 156177584 | 1 | 24519 | 0.031302 | 4.57E-57 | eqtl-a-ENSG00000196189 | rs191533912 | A | G | 0.0368751 | TRUE | reported | igd | 253.435043 | ENSG00000196189 | SEMA4A |
| 606 | -0.360257 | 156206181 | 1 | 14134 | 0.052737 | 8.42E-12 | eqtl-a-ENSG00000196189 | rs11540816 | T | C | 0.0128601 | TRUE | reported | igd | 46.6586916 | ENSG00000196189 | SEMA4A |
| 607 | 0.705747 | 156129796 | 1 | 30902 | 0.0172694 | 1.00E-200 | eqtl-a-ENSG00000196189 | rs76719272 | T | C | 0.120804 | TRUE | reported | igd | 1669.99617 | ENSG00000196189 | SEMA4A |
| 608 | 0.127915 | 173205318 | 5 | 31569 | 0.0136963 | 9.67E-21 | eqtl-a-ENSG00000196189 | rs2594836 | A | G | 0.749651 | TRUE | reported | igd | 87.2185606 | ENSG00000196189 | SEMA4A |
| 609 | -0.201754 | 144385777 | 6 | 25735 | 0.0266036 | 3.36E-14 | eqtl-a-ENSG00000196189 | rs149110519 | T | C | 0.0526158 | TRUE | reported | igd | 57.508195 | ENSG00000196189 | SEMA4A |
| 610 | -0.195762 | 54685880 | 12 | 29836 | 0.0255961 | 2.04E-14 | eqtl-a-ENSG00000196189 | rs35979828 | T | C | 0.0571059 | TRUE | reported | igd | 58.489792 | ENSG00000196189 | SEMA4A |
| 611 | 0.0819673 | 38163295 | 17 | 31569 | 0.0122453 | 2.18E-11 | eqtl-a-ENSG00000196189 | rs12600856 | C | T | 0.379553 | TRUE | reported | igd | 44.8038037 | ENSG00000196189 | SEMA4A |
| 612 | 0.417639 | 207494679 | 1 | 31567 | 0.012887 | 1.00E-200 | eqtl-a-ENSG00000196352 | rs28371583 | G | A | 0.27312 | TRUE | reported | igd | 1050.19736 | ENSG00000196352 | CD55 |
| 613 | 0.0790574 | 208299199 | 1 | 31300 | 0.0119082 | 3.16E-11 | eqtl-a-ENSG00000196352 | rs10863698 | A | G | 0.53123 | TRUE | reported | igd | 44.0722338 | ENSG00000196352 | CD55 |
| 614 | 0.199875 | 207257303 | 1 | 31684 | 0.0143658 | 5.28E-44 | eqtl-a-ENSG00000196352 | rs2842754 | C | T | 0.215961 | TRUE | reported | igd | 193.56637 | ENSG00000196352 | CD55 |
| 615 | -0.583208 | 207314388 | 1 | 31355 | 0.014099 | 1.00E-200 | eqtl-a-ENSG00000196352 | rs12043615 | T | C | 0.198231 | TRUE | reported | igd | 1710.97089 | ENSG00000196352 | CD55 |
| 616 | 0.15075 | 206973715 | 1 | 31684 | 0.0122617 | 9.73E-35 | eqtl-a-ENSG00000196352 | rs11119587 | G | A | 0.370044 | TRUE | reported | igd | 151.14224 | ENSG00000196352 | CD55 |
| 617 | -0.132936 | 148200011 | 5 | 31569 | 0.0120153 | 1.88E-28 | eqtl-a-ENSG00000196352 | rs56330463 | C | T | 0.582097 | TRUE | reported | igd | 122.401985 | ENSG00000196352 | CD55 |
| 618 | -0.282314 | 150174304 | 3 | 31470 | 0.0120231 | 6.41E-122 | eqtl-a-ENSG00000196428 | rs6770424 | G | A | 0.619001 | TRUE | reported | igd | 551.320715 | ENSG00000196428 | TSC22D2 |
| 619 | 0.180775 | 38346396 | 1 | 25950 | 0.0119361 | 8.18E-52 | eqtl-a-ENSG00000196449 | rs9701812 | T | C | 0.426923 | TRUE | reported | igd | 229.360365 | ENSG00000196449 | YRDC |
| 620 | -0.367376 | 97212693 | 2 | 31470 | 0.0131388 | 4.82E-172 | eqtl-a-ENSG00000196843 | rs2278563 | T | C | 0.264271 | TRUE | reported | igd | 781.776403 | ENSG00000196843 | ARID5A |
| 621 | 0.106395 | 97423626 | 2 | 31470 | 0.0120498 | 1.05E-18 | eqtl-a-ENSG00000196843 | rs968470 | C | T | 0.414127 | TRUE | reported | igd | 77.9570074 | ENSG00000196843 | ARID5A |
| 622 | 0.0746107 | 198147776 | 2 | 14262 | 0.0122455 | 1.11E-09 | eqtl-a-ENSG00000197121 | rs1896854 | T | G | 0.380044 | TRUE | reported | igd | 37.1183171 | ENSG00000197121 | PGAP1 |
| 623 | -0.10483 | 197498891 | 2 | 14262 | 0.0186159 | 1.79E-08 | eqtl-a-ENSG00000197121 | rs111268280 | A | G | 0.115276 | TRUE | reported | igd | 31.7060537 | ENSG00000197121 | PGAP1 |
| 624 | -0.197015 | 197816450 | 2 | 14254 | 0.0168576 | 1.48E-31 | eqtl-a-ENSG00000197121 | rs2376188 | C | T | 0.14427 | TRUE | reported | igd | 136.567122 | ENSG00000197121 | PGAP1 |
| 625 | 0.231231 | 28129231 | 6 | 21600 | 0.0213944 | 3.16E-27 | eqtl-a-ENSG00000197279 | rs13197175 | T | C | 0.0837732 | TRUE | reported | igd | 116.802376 | ENSG00000197279 | ZNF165 |
| 626 | -0.177445 | 28004133 | 6 | 28007 | 0.0315127 | 1.79E-08 | eqtl-a-ENSG00000197279 | rs147762891 | T | G | 0.0369571 | TRUE | reported | igd | 31.7048197 | ENSG00000197279 | ZNF165 |
| 627 | 0.270494 | 28066223 | 6 | 28489 | 0.0362924 | 9.12E-14 | eqtl-a-ENSG00000197279 | rs73396575 | G | T | 0.0275476 | TRUE | reported | igd | 55.5460787 | ENSG00000197279 | ZNF165 |
| 628 | -0.0724325 | 44596545 | 20 | 31354 | 0.0120705 | 1.96E-09 | eqtl-a-ENSG00000198026 | rs3848719 | A | G | 0.413468 | TRUE | reported | igd | 36.0071482 | ENSG00000198026 | ZNF335 |
| 629 | 0.0703063 | 69312969 | 2 | 31470 | 0.012448 | 1.62E-08 | eqtl-a-ENSG00000198380 | rs11686284 | C | T | 0.648014 | TRUE | reported | igd | 31.897873 | ENSG00000198380 | GFPT1 |
| 630 | -0.687221 | 69678080 | 2 | 24020 | 0.0405904 | 2.68E-64 | eqtl-a-ENSG00000198380 | rs115779380 | A | G | 0.021536 | TRUE | reported | igd | 286.622328 | ENSG00000198380 | GFPT1 |
| 631 | 0.438231 | 69512728 | 2 | 31470 | 0.0114634 | 1.00E-200 | eqtl-a-ENSG00000198380 | rs6546495 | C | A | 0.42433 | TRUE | reported | igd | 1461.34143 | ENSG00000198380 | GFPT1 |
| 632 | 0.382881 | 69941831 | 2 | 27766 | 0.0312311 | 1.50E-34 | eqtl-a-ENSG00000198380 | rs62133973 | A | G | 0.0373281 | TRUE | reported | igd | 150.287128 | ENSG00000198380 | GFPT1 |
| 633 | -0.248268 | 70402603 | 2 | 27401 | 0.0383651 | 9.72E-11 | eqtl-a-ENSG00000198380 | rs115053006 | G | T | 0.0246007 | TRUE | reported | igd | 41.8732936 | ENSG00000198380 | GFPT1 |
| 634 | 0.123333 | 137881690 | 7 | 6421 | 0.0125987 | 1.25E-22 | eqtl-a-ENSG00000198848 | rs7785014 | C | T | 0.668332 | TRUE | reported | igd | 95.8013938 | ENSG00000198848 | CES1 |
| 635 | -0.386458 | 55877327 | 16 | 5258 | 0.0459812 | 4.29E-17 | eqtl-a-ENSG00000198848 | rs72808062 | A | G | 0.0169585 | TRUE | reported | igd | 70.6120429 | ENSG00000198848 | CES1 |
| 636 | 0.464631 | 55861794 | 16 | 5502 | 0.0118325 | 1.00E-200 | eqtl-a-ENSG00000198848 | rs8192935 | G | A | 0.648007 | TRUE | reported | igd | 1541.36482 | ENSG00000198848 | CES1 |
| 637 | -0.294228 | 55874162 | 16 | 4897 | 0.0433811 | 1.18E-11 | eqtl-a-ENSG00000198848 | rs137925031 | C | T | 0.0191277 | TRUE | reported | igd | 45.9821709 | ENSG00000198848 | CES1 |
| 638 | -0.310856 | 55942016 | 16 | 5582 | 0.0412473 | 4.82E-14 | eqtl-a-ENSG00000198848 | rs75966374 | T | C | 0.0211863 | TRUE | reported | igd | 56.7769194 | ENSG00000198848 | CES1 |
| 639 | -0.12617 | 113202571 | 1 | 26609 | 0.0143657 | 1.59E-18 | eqtl-a-ENSG00000204178 | rs12120956 | A | G | 0.218422 | TRUE | reported | igd | 77.1304698 | ENSG00000204178 | MACO1 |
| 640 | 0.0954678 | 25635336 | 1 | 20886 | 0.0156654 | 1.10E-09 | eqtl-a-ENSG00000204178 | rs2478025 | C | G | 0.174375 | TRUE | reported | igd | 37.1354989 | ENSG00000204178 | MACO1 |
| 641 | -0.0750904 | 207159104 | 2 | 25796 | 0.012001 | 3.92E-10 | eqtl-a-ENSG00000204186 | rs55739749 | C | A | 0.431246 | TRUE | reported | igd | 39.1471627 | ENSG00000204186 | ZDBF2 |
| 642 | 0.212909 | 101267385 | 3 | 26494 | 0.0123481 | 1.28E-66 | eqtl-a-ENSG00000204519 | rs13062095 | C | T | 0.350092 | TRUE | reported | igd | 297.272667 | ENSG00000204519 | ZNF551 |
| 643 | -0.0870524 | 58511682 | 19 | 25827 | 0.0127872 | 9.92E-12 | eqtl-a-ENSG00000204519 | rs11084527 | C | T | 0.684574 | TRUE | reported | igd | 46.3422323 | ENSG00000204519 | ZNF551 |
| 644 | 0.105834 | 58734330 | 19 | 26491 | 0.0185818 | 1.23E-08 | eqtl-a-ENSG00000204519 | rs2445859 | C | T | 0.115756 | TRUE | reported | igd | 32.4371037 | ENSG00000204519 | ZNF551 |
| 645 | -0.101313 | 31336418 | 6 | 21798 | 0.0143212 | 1.50E-12 | eqtl-a-ENSG00000211778 | rs9266406 | A | G | 0.220902 | TRUE | reported | igd | 50.0416571 | ENSG00000211778 | TRAV4 |
| 646 | 0.0944729 | 135669097 | 6 | 22495 | 0.0119329 | 2.43E-15 | eqtl-a-ENSG00000211778 | rs2746427 | A | T | 0.548281 | TRUE | reported | igd | 62.6734897 | ENSG00000211778 | TRAV4 |
| 647 | -0.5995 | 22204568 | 14 | 20762 | 0.0116085 | 1.00E-200 | eqtl-a-ENSG00000211778 | rs2049788 | A | G | 0.329977 | TRUE | reported | igd | 2666.76242 | ENSG00000211778 | TRAV4 |
| 648 | 0.0856652 | 22910937 | 14 | 21090 | 0.0147123 | 5.79E-09 | eqtl-a-ENSG00000211778 | rs17183617 | T | C | 0.205488 | TRUE | reported | igd | 33.9005337 | ENSG00000211778 | TRAV4 |
| 649 | -0.101704 | 32158319 | 6 | 4720 | 0.0145648 | 2.89E-12 | eqtl-a-ENSG00000211780 | rs176095 | G | A | 0.210883 | TRUE | reported | igd | 48.7397116 | ENSG00000211780 | TRAV6 |
| 650 | 0.0833812 | 22910937 | 14 | 5501 | 0.0147132 | 1.45E-08 | eqtl-a-ENSG00000211780 | rs17183617 | T | C | 0.205488 | TRUE | reported | igd | 32.1043647 | ENSG00000211780 | TRAV6 |
| 651 | -0.0919515 | 22224151 | 14 | 5079 | 0.0130581 | 1.90E-12 | eqtl-a-ENSG00000211780 | rs28536189 | A | G | 0.292673 | TRUE | reported | igd | 49.5663121 | ENSG00000211780 | TRAV6 |
| 652 | -0.356329 | 29180115 | 2 | 31563 | 0.0166173 | 5.26E-102 | eqtl-a-ENSG00000213639 | rs6724450 | A | G | 0.145368 | TRUE | reported | igd | 459.784045 | ENSG00000213639 | PPP1CB |
| 653 | 0.267239 | 28794877 | 2 | 22176 | 0.0485421 | 3.69E-08 | eqtl-a-ENSG00000213639 | rs78966763 | A | C | 0.015233 | TRUE | reported | igd | 30.3056348 | ENSG00000213639 | PPP1CB |
| 654 | 0.362306 | 28868236 | 2 | 17384 | 0.046252 | 4.76E-15 | eqtl-a-ENSG00000213639 | rs116358673 | T | C | 0.0167683 | TRUE | reported | igd | 61.3536 | ENSG00000213639 | PPP1CB |
| 655 | 0.558262 | 28906644 | 2 | 31346 | 0.0120003 | 1.00E-200 | eqtl-a-ENSG00000213639 | rs7586405 | G | A | 0.691618 | TRUE | reported | igd | 2164.03468 | ENSG00000213639 | PPP1CB |
| 656 | 0.0869674 | 6287475 | 10 | 21828 | 0.01329 | 5.99E-11 | eqtl-a-ENSG00000215244 | rs7906176 | A | G | 0.723719 | TRUE | reported | igd | 42.8176884 | ENSG00000215244 | LINC02649 |
| 657 | -0.176018 | 6275145 | 10 | 22495 | 0.0118641 | 8.57E-50 | eqtl-a-ENSG00000215244 | rs1539232 | C | T | 0.546901 | TRUE | reported | igd | 220.092859 | ENSG00000215244 | LINC02649 |
| 658 | 0.0684316 | 6475947 | 10 | 22491 | 0.0119623 | 1.06E-08 | eqtl-a-ENSG00000215244 | rs10906559 | T | C | 0.444998 | TRUE | reported | igd | 32.722418 | ENSG00000215244 | LINC02649 |
| 659 | -0.296408 | 6385708 | 10 | 22495 | 0.0153536 | 4.84E-83 | eqtl-a-ENSG00000215244 | rs12764305 | C | T | 0.178135 | TRUE | reported | igd | 372.666868 | ENSG00000215244 | LINC02649 |
| 660 | -0.156515 | 30140913 | 6 | 19813 | 0.0144047 | 1.68E-27 | eqtl-a-ENSG00000231074 | rs2844787 | T | G | 0.784075 | TRUE | reported | igd | 118.048277 | ENSG00000231074 | HCG18 |
| 661 | -0.093137 | 29511850 | 6 | 21766 | 0.0136769 | 9.79E-12 | eqtl-a-ENSG00000231074 | rs1233417 | T | C | 0.747486 | TRUE | reported | igd | 46.3691611 | ENSG00000231074 | HCG18 |
| 662 | -0.273259 | 30265594 | 6 | 16593 | 0.0128583 | 3.19E-100 | eqtl-a-ENSG00000231074 | rs261955 | C | T | 0.294109 | TRUE | reported | igd | 451.574585 | ENSG00000231074 | HCG18 |
| 663 | -0.478708 | 235351851 | 2 | 5502 | 0.0116517 | 1.00E-200 | eqtl-a-ENSG00000231682 | rs1472928 | T | A | 0.63018 | TRUE | reported | igd | 1687.34887 | ENSG00000231682 | LINC01891 |
| 664 | 0.111318 | 235350173 | 2 | 5164 | 0.0164293 | 1.24E-11 | eqtl-a-ENSG00000231682 | rs28757817 | G | A | 0.154761 | TRUE | reported | igd | 45.890674 | ENSG00000231682 | LINC01891 |
| 665 | -0.478519 | 242846306 | 2 | 5500 | 0.0112199 | 1.00E-200 | eqtl-a-ENSG00000233806 | rs10221550 | C | T | 0.527019 | TRUE | reported | igd | 1818.28705 | ENSG00000233806 | LINC01237 |
| 666 | 0.0879891 | 242691021 | 2 | 3167 | 0.0126111 | 3.02E-12 | eqtl-a-ENSG00000233806 | rs4073694 | G | C | 0.332566 | TRUE | reported | igd | 48.6493972 | ENSG00000233806 | LINC01237 |
| 667 | 0.0998425 | 57798189 | 4 | 5502 | 0.0147659 | 1.36E-11 | eqtl-a-ENSG00000238197 | rs2227901 | A | G | 0.203258 | TRUE | reported | igd | 45.7038885 | ENSG00000238197 | PAXBP1-AS1 |
| 668 | 0.16385 | 34081711 | 21 | 5502 | 0.0244414 | 2.03E-11 | eqtl-a-ENSG00000238197 | rs113171118 | T | C | 0.0630898 | TRUE | reported | igd | 44.9244571 | ENSG00000238197 | PAXBP1-AS1 |
| 669 | -0.0869497 | 64014904 | 3 | 22492 | 0.0143517 | 1.37E-09 | eqtl-a-ENSG00000239653 | rs35840 | A | C | 0.219886 | TRUE | reported | igd | 36.7020955 | ENSG00000239653 | PSMD6-AS2 |
| 670 | 0.249089 | 63997896 | 3 | 22495 | 0.0118361 | 2.55E-98 | eqtl-a-ENSG00000239653 | rs2280160 | A | G | 0.569563 | TRUE | reported | igd | 442.846516 | ENSG00000239653 | PSMD6-AS2 |
| 671 | 0.0800669 | 15595658 | 17 | 20862 | 0.012557 | 1.82E-10 | eqtl-a-ENSG00000239704 | rs4792648 | T | C | 0.338791 | TRUE | reported | igd | 40.6530002 | ENSG00000239704 | CDRT4 |
| 672 | -0.389842 | 15468444 | 17 | 28480 | 0.0121868 | 1.00E-200 | eqtl-a-ENSG00000239704 | rs236815 | A | C | 0.333839 | TRUE | reported | igd | 1023.21615 | ENSG00000239704 | CDRT4 |
| 673 | 0.325487 | 9218201 | 12 | 5501 | 0.0123169 | 6.89E-154 | eqtl-a-ENSG00000245105 | rs10771307 | T | G | 0.334145 | TRUE | reported | igd | 698.082159 | ENSG00000245105 | A2M-AS1 |
| 674 | -0.0916619 | 9484381 | 12 | 5502 | 0.0151635 | 1.49E-09 | eqtl-a-ENSG00000245105 | rs11050267 | T | C | 0.189616 | TRUE | reported | igd | 36.5275802 | ENSG00000245105 | A2M-AS1 |
| 675 | -0.336775 | 11917083 | 18 | 31347 | 0.0179535 | 1.65E-78 | eqtl-a-ENSG00000255112 | rs113373974 | A | C | 0.122145 | TRUE | reported | igd | 351.846899 | ENSG00000255112 | CHMP1B |
| 676 | 0.0743868 | 101267385 | 3 | 26494 | 0.0124618 | 2.39E-09 | eqtl-a-ENSG00000256223 | rs13062095 | C | T | 0.350092 | TRUE | reported | igd | 35.6284897 | ENSG00000256223 | ZNF10 |
| 677 | -0.236112 | 133730500 | 12 | 26490 | 0.0118331 | 1.39E-88 | eqtl-a-ENSG00000256223 | rs7970687 | T | C | 0.562892 | TRUE | reported | igd | 398.112909 | ENSG00000256223 | ZNF10 |
| 678 | 0.0900322 | 92539590 | 12 | 8171 | 0.0119615 | 5.21E-14 | eqtl-a-ENSG00000257242 | rs12694 | C | T | 0.441601 | TRUE | reported | igd | 56.6393318 | ENSG00000257242 | LINC01619 |
| 679 | 0.55165 | 78326129 | 17 | 4994 | 0.0285289 | 2.65E-83 | eqtl-a-ENSG00000263069 | rs59864587 | T | C | 0.0443683 | TRUE | reported | igd | 373.751746 | ENSG00000263069 | RNF213-AS1 |
| 680 | 0.113081 | 10343619 | 19 | 15188 | 0.0122126 | 2.05E-20 | eqtl-a-ENSG00000267534 | rs12986385 | A | C | 0.618017 | TRUE | reported | igd | 85.72467 | ENSG00000267534 | S1PR2 |
