# Supplementary material for: Aging-related CD8 + T cell alterations and calcium/calmodulin dependent protein kinase 1D activation in the pathogenesis of diabetic kidney disease
Source: PeerJ journal article supplement (doi:10.7717/peerj.20762), 2026-02-13
Supplement: Supplementary_table_6.docx [file Supplementary_table_6.docx]

**Supplementary table 6** Genes obtained after sc-RNA seq and MR analysis

| Gene | ENSEMBL ID | SNP | Effect allele | OR (95% CI) | P value | PVE | F statistics |
| --- | --- | --- | --- | --- | --- | --- | --- |
| SARM1 | ENSG00000004139 | rs4794828 | A | 0.72 (0.56, 0.91) | 5.99E-03 | 3.34% | 915.29 |
| FYN | ENSG00000010810 | rs1474466 | G | 0.48 (0.30, 0.75) | 1.55E-03 | 0.87% | 148 |
| FYN | ENSG00000010810 | rs1067141 | C | 0.48 (0.30, 0.75) | 1.55E-03 | 0.87% | 51.95 |
| FYN | ENSG00000010810 | rs10423726 | A | 0.48 (0.30, 0.75) | 1.55E-03 | 0.87% | 35.02 |
| RRP12 | ENSG00000052749 | rs3731827 | C | 1.13 (1.01, 1.27) | 3.43E-02 | 13.63% | 53.05 |
| RRP12 | ENSG00000052749 | rs56330463 | C | 1.13 (1.01, 1.27) | 3.43E-02 | 13.63% | 67.44 |
| RRP12 | ENSG00000052749 | rs2594836 | A | 1.13 (1.01, 1.27) | 3.43E-02 | 13.63% | 37.94 |
| RRP12 | ENSG00000052749 | rs12360528 | A | 1.13 (1.01, 1.27) | 3.43E-02 | 13.63% | 1010.62 |
| RRP12 | ENSG00000052749 | rs74433050 | G | 1.13 (1.01, 1.27) | 3.43E-02 | 13.63% | 473.85 |
| RRP12 | ENSG00000052749 | rs74529649 | G | 1.13 (1.01, 1.27) | 3.43E-02 | 13.63% | 82.08 |
| RRP12 | ENSG00000052749 | rs61858089 | C | 1.13 (1.01, 1.27) | 3.43E-02 | 13.63% | 30.56 |
| RRP12 | ENSG00000052749 | rs701808 | A | 1.13 (1.01, 1.27) | 3.43E-02 | 13.63% | 2649.19 |
| RRP12 | ENSG00000052749 | rs3184504 | C | 1.13 (1.01, 1.27) | 3.43E-02 | 13.63% | 55.56 |
| RRP12 | ENSG00000052749 | rs7210990 | A | 1.13 (1.01, 1.27) | 3.43E-02 | 13.63% | 30.67 |
| MTHFD2 | ENSG00000065911 | rs12465641 | A | 1.45 (1.07, 1.98) | 1.75E-02 | 1.59% | 39.44 |
| MTHFD2 | ENSG00000065911 | rs1667600 | T | 1.45 (1.07, 1.98) | 1.75E-02 | 1.59% | 465.74 |
| KAT6A | ENSG00000083168 | rs149007767 | T | 5.27 (1.63, 16.98) | 5.43E-03 | 2.31% | 30.19 |
| KAT6A | ENSG00000083168 | rs4737024 | C | 5.27 (1.63, 16.98) | 5.43E-03 | 2.31% | 510.46 |
| LYPD3 | ENSG00000124466 | rs2599437 | C | 0.45 (0.26, 0.81) | 7.01E-03 | 0.44% | 140.48 |
| TRAF3 | ENSG00000131323 | rs149007767 | T | 1.38 (1.03, 1.86) | 3.31E-02 | 2.57% | 33.02 |
| TRAF3 | ENSG00000131323 | rs4149577 | A | 1.38 (1.03, 1.86) | 3.31E-02 | 2.57% | 30.42 |
| TRAF3 | ENSG00000131323 | rs111778408 | A | 1.38 (1.03, 1.86) | 3.31E-02 | 2.57% | 62.67 |
| TRAF3 | ENSG00000131323 | rs71421262 | G | 1.38 (1.03, 1.86) | 3.31E-02 | 2.57% | 646.49 |
| TRAF3 | ENSG00000131323 | rs141926895 | A | 1.38 (1.03, 1.86) | 3.31E-02 | 2.57% | 37.03 |
| TTC16 | ENSG00000167094 | rs11790018 | G | 0.80 (0.66, 0.98) | 2.79E-02 | 4.10% | 35.45 |
| TTC16 | ENSG00000167094 | rs3802357 | A | 0.80 (0.66, 0.98) | 2.79E-02 | 4.10% | 1231.91 |
| TTC16 | ENSG00000167094 | rs11221332 | T | 0.80 (0.66, 0.98) | 2.79E-02 | 4.10% | 37.88 |
| TTC16 | ENSG00000167094 | rs2617170 | C | 0.80 (0.66, 0.98) | 2.79E-02 | 4.10% | 36.99 |
| TTC21A | ENSG00000168026 | rs28362640 | C | 1.36 (1.02, 1.81) | 3.49E-02 | 2.61% | 109.63 |
| TTC21A | ENSG00000168026 | rs6786855 | G | 1.36 (1.02, 1.81) | 3.49E-02 | 2.61% | 545.89 |
| TTC21A | ENSG00000168026 | rs3184504 | C | 1.36 (1.02, 1.81) | 3.49E-02 | 2.61% | 42.91 |
| TSEN54 | ENSG00000182173 | rs7225469 | C | 0.79 (0.66, 0.95) | 1.39E-02 | 2.79% | 907.28 |
| CAMK1D | ENSG00000183049 | rs28498283 | T | 1.46 (1.14, 1.87) | 2.58E-03 | 8.08% | 31.01 |
| CAMK1D | ENSG00000183049 | rs149007767 | T | 1.46 (1.14, 1.87) | 2.58E-03 | 8.08% | 55 |
| CAMK1D | ENSG00000183049 | rs17512962 | A | 1.46 (1.14, 1.87) | 2.58E-03 | 8.08% | 61.29 |
| CAMK1D | ENSG00000183049 | rs11257593 | G | 1.46 (1.14, 1.87) | 2.58E-03 | 8.08% | 1467.62 |
| CAMK1D | ENSG00000183049 | rs11257676 | A | 1.46 (1.14, 1.87) | 2.58E-03 | 8.08% | 727.86 |
| CAMK1D | ENSG00000183049 | rs1757051 | G | 1.46 (1.14, 1.87) | 2.58E-03 | 8.08% | 228.08 |
| CAMK1D | ENSG00000183049 | rs35979828 | T | 1.46 (1.14, 1.87) | 2.58E-03 | 8.08% | 38.96 |
| SOCS3 | ENSG00000184557 | rs3859192 | T | 2.20 (1.02, 4.72) | 4.37E-02 | 0.25% | 78.6 |
| RHD | ENSG00000187010 | rs35661205 | G | 1.20 (1.01, 1.43) | 4.27E-02 | 7.33% | 102.82 |
| RHD | ENSG00000187010 | rs2375112 | T | 1.20 (1.01, 1.43) | 4.27E-02 | 7.33% | 1516.35 |
| RHD | ENSG00000187010 | rs76402153 | T | 1.20 (1.01, 1.43) | 4.27E-02 | 7.33% | 54.73 |
| RHD | ENSG00000187010 | rs3093654 | G | 1.20 (1.01, 1.43) | 4.27E-02 | 7.33% | 368.78 |
| RHD | ENSG00000187010 | rs116012799 | G | 1.20 (1.01, 1.43) | 4.27E-02 | 7.33% | 51.83 |
| TRAV4 | ENSG00000211778 | rs9266406 | A | 1.21 (1.03, 1.42) | 2.37E-02 | 12.05% | 50.04 |
| TRAV4 | ENSG00000211778 | rs2746427 | A | 1.21 (1.03, 1.42) | 2.37E-02 | 12.05% | 62.67 |
| TRAV4 | ENSG00000211778 | rs2049788 | A | 1.21 (1.03, 1.42) | 2.37E-02 | 12.05% | 2666.76 |
| TRAV4 | ENSG00000211778 | rs17183617 | T | 1.21 (1.03, 1.42) | 2.37E-02 | 12.05% | 33.9 |
| LINC01237 | ENSG00000233806 | rs10221550 | C | 1.26 (1.06, 1.51) | 1.02E-02 | 26.37% | 1818.29 |
| LINC01237 | ENSG00000233806 | rs4073694 | G | 1.26 (1.06, 1.51) | 1.02E-02 | 26.37% | 48.65 |
