# Supplementary material for: Aging-related CD8 + T cell alterations and calcium/calmodulin dependent protein kinase 1D activation in the pathogenesis of diabetic kidney disease
Source: PeerJ journal article supplement (doi:10.7717/peerj.20762), 2026-02-13
Supplement: Supplementary_table_7.docx [file Supplementary_table_7.docx]

**Supplementary table 7** Heterogeneity

| Id.exposure | Id.outcome | Outcome | Exposure | Method | Q | Q_df | Q_pval |
| --- | --- | --- | --- | --- | --- | --- | --- |
| eqtl-a-ENSG00000010810 | ebi-a-GCST90018832 | Diabetic nephropathy || id:ebi-a-GCST90018832 | FYN | MR Egger | 0.7097114 | 1 | 0.39953964 |
| eqtl-a-ENSG00000010810 | ebi-a-GCST90018832 | Diabetic nephropathy || id:ebi-a-GCST90018832 | FYN | Inverse variance weighted | 0.72659647 | 2 | 0.69537902 |
| eqtl-a-ENSG00000013725 | ebi-a-GCST90018832 | Diabetic nephropathy || id:ebi-a-GCST90018832 | CD6 | MR Egger | 4.28295027 | 5 | 0.50943783 |
| eqtl-a-ENSG00000013725 | ebi-a-GCST90018832 | Diabetic nephropathy || id:ebi-a-GCST90018832 | CD6 | Inverse variance weighted | 7.52099951 | 6 | 0.27533646 |
| eqtl-a-ENSG00000023171 | ebi-a-GCST90018832 | Diabetic nephropathy || id:ebi-a-GCST90018832 | GRAMD1B | MR Egger | 0.60547202 | 2 | 0.73879411 |
| eqtl-a-ENSG00000023171 | ebi-a-GCST90018832 | Diabetic nephropathy || id:ebi-a-GCST90018832 | GRAMD1B | Inverse variance weighted | 1.0505774 | 3 | 0.78901625 |
| eqtl-a-ENSG00000026652 | ebi-a-GCST90018832 | Diabetic nephropathy || id:ebi-a-GCST90018832 | AGPAT4 | MR Egger | 3.19131245 | 3 | 0.36305863 |
| eqtl-a-ENSG00000026652 | ebi-a-GCST90018832 | Diabetic nephropathy || id:ebi-a-GCST90018832 | AGPAT4 | Inverse variance weighted | 3.42091384 | 4 | 0.490005 |
| eqtl-a-ENSG00000047056 | ebi-a-GCST90018832 | Diabetic nephropathy || id:ebi-a-GCST90018832 | WDR37 | MR Egger | 3.77868397 | 2 | 0.15117125 |
| eqtl-a-ENSG00000047056 | ebi-a-GCST90018832 | Diabetic nephropathy || id:ebi-a-GCST90018832 | WDR37 | Inverse variance weighted | 5.21152087 | 3 | 0.15694781 |
| eqtl-a-ENSG00000050344 | ebi-a-GCST90018832 | Diabetic nephropathy || id:ebi-a-GCST90018832 | NFE2L3 | MR Egger | 0.02723394 | 1 | 0.86892265 |
| eqtl-a-ENSG00000050344 | ebi-a-GCST90018832 | Diabetic nephropathy || id:ebi-a-GCST90018832 | NFE2L3 | Inverse variance weighted | 0.39315825 | 2 | 0.82153633 |
| eqtl-a-ENSG00000052749 | ebi-a-GCST90018832 | Diabetic nephropathy || id:ebi-a-GCST90018832 | RRP12 | MR Egger | 3.58247542 | 7 | 0.82641415 |
| eqtl-a-ENSG00000052749 | ebi-a-GCST90018832 | Diabetic nephropathy || id:ebi-a-GCST90018832 | RRP12 | Inverse variance weighted | 7.77095782 | 8 | 0.4561576 |
| eqtl-a-ENSG00000054392 | ebi-a-GCST90018832 | Diabetic nephropathy || id:ebi-a-GCST90018832 | HHAT | Inverse variance weighted | 0.71897115 | 1 | 0.3964816 |
| eqtl-a-ENSG00000054611 | ebi-a-GCST90018832 | Diabetic nephropathy || id:ebi-a-GCST90018832 | TBC1D22A | Inverse variance weighted | 0.49047959 | 1 | 0.48371345 |
| eqtl-a-ENSG00000055483 | ebi-a-GCST90018832 | Diabetic nephropathy || id:ebi-a-GCST90018832 | USP36 | MR Egger | 5.71946959 | 2 | 0.05728395 |
| eqtl-a-ENSG00000055483 | ebi-a-GCST90018832 | Diabetic nephropathy || id:ebi-a-GCST90018832 | USP36 | Inverse variance weighted | 7.7228793 | 3 | 0.05209997 |
| eqtl-a-ENSG00000065911 | ebi-a-GCST90018832 | Diabetic nephropathy || id:ebi-a-GCST90018832 | MTHFD2 | Inverse variance weighted | 0.02659067 | 1 | 0.87046612 |
| eqtl-a-ENSG00000065989 | ebi-a-GCST90018832 | Diabetic nephropathy || id:ebi-a-GCST90018832 | PDE4A | MR Egger | 0.89309953 | 1 | 0.34463875 |
| eqtl-a-ENSG00000065989 | ebi-a-GCST90018832 | Diabetic nephropathy || id:ebi-a-GCST90018832 | PDE4A | Inverse variance weighted | 1.17273909 | 2 | 0.5563434 |
| eqtl-a-ENSG00000066855 | ebi-a-GCST90018832 | Diabetic nephropathy || id:ebi-a-GCST90018832 | MTFR1 | Inverse variance weighted | 0.32221371 | 1 | 0.57028031 |
| eqtl-a-ENSG00000069399 | ebi-a-GCST90018832 | Diabetic nephropathy || id:ebi-a-GCST90018832 | BCL3 | MR Egger | 2.19188007 | 1 | 0.13873988 |
| eqtl-a-ENSG00000069399 | ebi-a-GCST90018832 | Diabetic nephropathy || id:ebi-a-GCST90018832 | BCL3 | Inverse variance weighted | 2.97327897 | 2 | 0.2261313 |
| eqtl-a-ENSG00000069849 | ebi-a-GCST90018832 | Diabetic nephropathy || id:ebi-a-GCST90018832 | ATP1B3 | Inverse variance weighted | 0.33585771 | 1 | 0.56223004 |
| eqtl-a-ENSG00000070495 | ebi-a-GCST90018832 | Diabetic nephropathy || id:ebi-a-GCST90018832 | JMJD6 | MR Egger | 0.0938135 | 1 | 0.75938394 |
| eqtl-a-ENSG00000070495 | ebi-a-GCST90018832 | Diabetic nephropathy || id:ebi-a-GCST90018832 | JMJD6 | Inverse variance weighted | 1.47078732 | 2 | 0.47931673 |
| eqtl-a-ENSG00000070718 | ebi-a-GCST90018832 | Diabetic nephropathy || id:ebi-a-GCST90018832 | AP3M2 | MR Egger | 6.59403052 | 3 | 0.08602703 |
| eqtl-a-ENSG00000070718 | ebi-a-GCST90018832 | Diabetic nephropathy || id:ebi-a-GCST90018832 | AP3M2 | Inverse variance weighted | 9.26394303 | 4 | 0.05483032 |
| eqtl-a-ENSG00000071205 | ebi-a-GCST90018832 | Diabetic nephropathy || id:ebi-a-GCST90018832 | ARHGAP10 | MR Egger | 0.1646937 | 1 | 0.6848714 |
| eqtl-a-ENSG00000071205 | ebi-a-GCST90018832 | Diabetic nephropathy || id:ebi-a-GCST90018832 | ARHGAP10 | Inverse variance weighted | 0.33529412 | 2 | 0.84565225 |
| eqtl-a-ENSG00000074621 | ebi-a-GCST90018832 | Diabetic nephropathy || id:ebi-a-GCST90018832 | SLC24A1 | Inverse variance weighted | 0.30718394 | 1 | 0.5794134 |
| eqtl-a-ENSG00000080298 | ebi-a-GCST90018832 | Diabetic nephropathy || id:ebi-a-GCST90018832 | RFX3 | Inverse variance weighted | 0.77986598 | 1 | 0.37718213 |
| eqtl-a-ENSG00000085433 | ebi-a-GCST90018832 | Diabetic nephropathy || id:ebi-a-GCST90018832 | WDR47 | Inverse variance weighted | 0.09450872 | 1 | 0.75852164 |
| eqtl-a-ENSG00000089902 | ebi-a-GCST90018832 | Diabetic nephropathy || id:ebi-a-GCST90018832 | RCOR1 | Inverse variance weighted | 0.46433586 | 1 | 0.49560455 |
| eqtl-a-ENSG00000092020 | ebi-a-GCST90018832 | Diabetic nephropathy || id:ebi-a-GCST90018832 | PPP2R3C | MR Egger | 1.3797897 | 4 | 0.84769995 |
| eqtl-a-ENSG00000092020 | ebi-a-GCST90018832 | Diabetic nephropathy || id:ebi-a-GCST90018832 | PPP2R3C | Inverse variance weighted | 4.43358743 | 5 | 0.48881808 |
| eqtl-a-ENSG00000092820 | ebi-a-GCST90018832 | Diabetic nephropathy || id:ebi-a-GCST90018832 | EZR | Inverse variance weighted | 1.38862342 | 1 | 0.23863771 |
| eqtl-a-ENSG00000095397 | ebi-a-GCST90018832 | Diabetic nephropathy || id:ebi-a-GCST90018832 | WHRN | Inverse variance weighted | 0.52715935 | 1 | 0.46780358 |
| eqtl-a-ENSG00000099995 | ebi-a-GCST90018832 | Diabetic nephropathy || id:ebi-a-GCST90018832 | SF3A1 | MR Egger | 6.07306267 | 5 | 0.2991744 |
| eqtl-a-ENSG00000099995 | ebi-a-GCST90018832 | Diabetic nephropathy || id:ebi-a-GCST90018832 | SF3A1 | Inverse variance weighted | 6.52115944 | 6 | 0.3674046 |
| eqtl-a-ENSG00000100290 | ebi-a-GCST90018832 | Diabetic nephropathy || id:ebi-a-GCST90018832 | BIK | MR Egger | 0.43104727 | 1 | 0.51147552 |
| eqtl-a-ENSG00000100290 | ebi-a-GCST90018832 | Diabetic nephropathy || id:ebi-a-GCST90018832 | BIK | Inverse variance weighted | 0.8923523 | 2 | 0.64007101 |
| eqtl-a-ENSG00000100450 | ebi-a-GCST90018832 | Diabetic nephropathy || id:ebi-a-GCST90018832 | GZMH | MR Egger | 7.41506212 | 4 | 0.11551355 |
| eqtl-a-ENSG00000100450 | ebi-a-GCST90018832 | Diabetic nephropathy || id:ebi-a-GCST90018832 | GZMH | Inverse variance weighted | 11.7176248 | 5 | 0.03886867 |
| eqtl-a-ENSG00000100991 | ebi-a-GCST90018832 | Diabetic nephropathy || id:ebi-a-GCST90018832 | TRPC4AP | MR Egger | 2.67909469 | 5 | 0.74931391 |
| eqtl-a-ENSG00000100991 | ebi-a-GCST90018832 | Diabetic nephropathy || id:ebi-a-GCST90018832 | TRPC4AP | Inverse variance weighted | 3.9804259 | 6 | 0.67932546 |
| eqtl-a-ENSG00000101695 | ebi-a-GCST90018832 | Diabetic nephropathy || id:ebi-a-GCST90018832 | RNF125 | Inverse variance weighted | 0.00157662 | 1 | 0.968327 |
| eqtl-a-ENSG00000102760 | ebi-a-GCST90018832 | Diabetic nephropathy || id:ebi-a-GCST90018832 | RGCC | MR Egger | 0.86144939 | 2 | 0.65003784 |
| eqtl-a-ENSG00000102760 | ebi-a-GCST90018832 | Diabetic nephropathy || id:ebi-a-GCST90018832 | RGCC | Inverse variance weighted | 4.4067284 | 3 | 0.22076232 |
| eqtl-a-ENSG00000103257 | ebi-a-GCST90018832 | Diabetic nephropathy || id:ebi-a-GCST90018832 | SLC7A5 | MR Egger | 7.68472498 | 5 | 0.1744884 |
| eqtl-a-ENSG00000103257 | ebi-a-GCST90018832 | Diabetic nephropathy || id:ebi-a-GCST90018832 | SLC7A5 | Inverse variance weighted | 8.91761575 | 6 | 0.17826459 |
| eqtl-a-ENSG00000103342 | ebi-a-GCST90018832 | Diabetic nephropathy || id:ebi-a-GCST90018832 | GSPT1 | MR Egger | 4.8251301 | 7 | 0.68129355 |
| eqtl-a-ENSG00000103342 | ebi-a-GCST90018832 | Diabetic nephropathy || id:ebi-a-GCST90018832 | GSPT1 | Inverse variance weighted | 7.882481 | 8 | 0.44503325 |
| eqtl-a-ENSG00000103522 | ebi-a-GCST90018832 | Diabetic nephropathy || id:ebi-a-GCST90018832 | IL21R | MR Egger | 2.4919515 | 2 | 0.28766009 |
| eqtl-a-ENSG00000103522 | ebi-a-GCST90018832 | Diabetic nephropathy || id:ebi-a-GCST90018832 | IL21R | Inverse variance weighted | 2.83099889 | 3 | 0.41842234 |
| eqtl-a-ENSG00000104450 | ebi-a-GCST90018832 | Diabetic nephropathy || id:ebi-a-GCST90018832 | SPAG1 | MR Egger | 1.76730334 | 2 | 0.41327103 |
| eqtl-a-ENSG00000104450 | ebi-a-GCST90018832 | Diabetic nephropathy || id:ebi-a-GCST90018832 | SPAG1 | Inverse variance weighted | 2.22009227 | 3 | 0.52800167 |
| eqtl-a-ENSG00000104856 | ebi-a-GCST90018832 | Diabetic nephropathy || id:ebi-a-GCST90018832 | RELB | MR Egger | 6.98576099 | 4 | 0.13664261 |
| eqtl-a-ENSG00000104856 | ebi-a-GCST90018832 | Diabetic nephropathy || id:ebi-a-GCST90018832 | RELB | Inverse variance weighted | 8.6756456 | 5 | 0.12272221 |
| eqtl-a-ENSG00000105866 | ebi-a-GCST90018832 | Diabetic nephropathy || id:ebi-a-GCST90018832 | SP4 | Inverse variance weighted | 0.22635647 | 1 | 0.63423871 |
| eqtl-a-ENSG00000105983 | ebi-a-GCST90018832 | Diabetic nephropathy || id:ebi-a-GCST90018832 | LMBR1 | MR Egger | 0.0902144 | 1 | 0.76390476 |
| eqtl-a-ENSG00000105983 | ebi-a-GCST90018832 | Diabetic nephropathy || id:ebi-a-GCST90018832 | LMBR1 | Inverse variance weighted | 0.82891052 | 2 | 0.66070009 |
| eqtl-a-ENSG00000106948 | ebi-a-GCST90018832 | Diabetic nephropathy || id:ebi-a-GCST90018832 | AKNA | Inverse variance weighted | 4.90486907 | 1 | 0.02678108 |
| eqtl-a-ENSG00000107643 | ebi-a-GCST90018832 | Diabetic nephropathy || id:ebi-a-GCST90018832 | MAPK8 | Inverse variance weighted | 2.25090392 | 1 | 0.13353638 |
| eqtl-a-ENSG00000109320 | ebi-a-GCST90018832 | Diabetic nephropathy || id:ebi-a-GCST90018832 | NFKB1 | MR Egger | 0.00791715 | 1 | 0.92909909 |
| eqtl-a-ENSG00000109320 | ebi-a-GCST90018832 | Diabetic nephropathy || id:ebi-a-GCST90018832 | NFKB1 | Inverse variance weighted | 1.60213578 | 2 | 0.44884939 |
| eqtl-a-ENSG00000109762 | ebi-a-GCST90018832 | Diabetic nephropathy || id:ebi-a-GCST90018832 | SNX25 | MR Egger | 0.70794257 | 2 | 0.70189512 |
| eqtl-a-ENSG00000109762 | ebi-a-GCST90018832 | Diabetic nephropathy || id:ebi-a-GCST90018832 | SNX25 | Inverse variance weighted | 2.1090745 | 3 | 0.55007911 |
| eqtl-a-ENSG00000111266 | ebi-a-GCST90018832 | Diabetic nephropathy || id:ebi-a-GCST90018832 | DUSP16 | MR Egger | 2.94286216 | 3 | 0.40051886 |
| eqtl-a-ENSG00000111266 | ebi-a-GCST90018832 | Diabetic nephropathy || id:ebi-a-GCST90018832 | DUSP16 | Inverse variance weighted | 13.4804481 | 4 | 0.0091519 |
| eqtl-a-ENSG00000112182 | ebi-a-GCST90018832 | Diabetic nephropathy || id:ebi-a-GCST90018832 | BACH2 | MR Egger | 0.46207379 | 2 | 0.79371018 |
| eqtl-a-ENSG00000112182 | ebi-a-GCST90018832 | Diabetic nephropathy || id:ebi-a-GCST90018832 | BACH2 | Inverse variance weighted | 1.62737417 | 3 | 0.65319896 |
| eqtl-a-ENSG00000113580 | ebi-a-GCST90018832 | Diabetic nephropathy || id:ebi-a-GCST90018832 | NR3C1 | Inverse variance weighted | 3.45143039 | 1 | 0.06319706 |
| eqtl-a-ENSG00000115902 | ebi-a-GCST90018832 | Diabetic nephropathy || id:ebi-a-GCST90018832 | SLC1A4 | MR Egger | 0.66253349 | 1 | 0.41566695 |
| eqtl-a-ENSG00000115902 | ebi-a-GCST90018832 | Diabetic nephropathy || id:ebi-a-GCST90018832 | SLC1A4 | Inverse variance weighted | 1.15372338 | 2 | 0.56165826 |
| eqtl-a-ENSG00000116874 | ebi-a-GCST90018832 | Diabetic nephropathy || id:ebi-a-GCST90018832 | WARS2 | MR Egger | 5.85161953 | 4 | 0.21050684 |
| eqtl-a-ENSG00000116874 | ebi-a-GCST90018832 | Diabetic nephropathy || id:ebi-a-GCST90018832 | WARS2 | Inverse variance weighted | 7.0998093 | 5 | 0.21332257 |
| eqtl-a-ENSG00000119725 | ebi-a-GCST90018832 | Diabetic nephropathy || id:ebi-a-GCST90018832 | ZNF410 | Inverse variance weighted | 0.44043694 | 1 | 0.50691164 |
| eqtl-a-ENSG00000119801 | ebi-a-GCST90018832 | Diabetic nephropathy || id:ebi-a-GCST90018832 | YPEL5 | MR Egger | 0.00272399 | 1 | 0.95837582 |
| eqtl-a-ENSG00000119801 | ebi-a-GCST90018832 | Diabetic nephropathy || id:ebi-a-GCST90018832 | YPEL5 | Inverse variance weighted | 0.00575644 | 2 | 0.99712592 |
| eqtl-a-ENSG00000119986 | ebi-a-GCST90018832 | Diabetic nephropathy || id:ebi-a-GCST90018832 | AVPI1 | Inverse variance weighted | 0.52686549 | 1 | 0.46792766 |
| eqtl-a-ENSG00000120539 | ebi-a-GCST90018832 | Diabetic nephropathy || id:ebi-a-GCST90018832 | MASTL | MR Egger | 1.86232702 | 3 | 0.60146669 |
| eqtl-a-ENSG00000120539 | ebi-a-GCST90018832 | Diabetic nephropathy || id:ebi-a-GCST90018832 | MASTL | Inverse variance weighted | 4.97161853 | 4 | 0.29022203 |
| eqtl-a-ENSG00000120784 | ebi-a-GCST90018832 | Diabetic nephropathy || id:ebi-a-GCST90018832 | ZFP30 | Inverse variance weighted | 5.21912599 | 1 | 0.02233978 |
| eqtl-a-ENSG00000121274 | ebi-a-GCST90018832 | Diabetic nephropathy || id:ebi-a-GCST90018832 | TENT4B | Inverse variance weighted | 0.64896137 | 1 | 0.42048426 |
| eqtl-a-ENSG00000125772 | ebi-a-GCST90018832 | Diabetic nephropathy || id:ebi-a-GCST90018832 | GPCPD1 | MR Egger | 2.35966849 | 4 | 0.66992775 |
| eqtl-a-ENSG00000125772 | ebi-a-GCST90018832 | Diabetic nephropathy || id:ebi-a-GCST90018832 | GPCPD1 | Inverse variance weighted | 3.22596542 | 5 | 0.66519399 |
| eqtl-a-ENSG00000126353 | ebi-a-GCST90018832 | Diabetic nephropathy || id:ebi-a-GCST90018832 | CCR7 | MR Egger | 6.88509782 | 3 | 0.07565168 |
| eqtl-a-ENSG00000126353 | ebi-a-GCST90018832 | Diabetic nephropathy || id:ebi-a-GCST90018832 | CCR7 | Inverse variance weighted | 6.88645731 | 4 | 0.14201148 |
| eqtl-a-ENSG00000126838 | ebi-a-GCST90018832 | Diabetic nephropathy || id:ebi-a-GCST90018832 | PZP | MR Egger | 3.81229283 | 1 | 0.05087776 |
| eqtl-a-ENSG00000126838 | ebi-a-GCST90018832 | Diabetic nephropathy || id:ebi-a-GCST90018832 | PZP | Inverse variance weighted | 5.11013886 | 2 | 0.07768684 |
| eqtl-a-ENSG00000128656 | ebi-a-GCST90018832 | Diabetic nephropathy || id:ebi-a-GCST90018832 | CHN1 | MR Egger | 3.21996888 | 4 | 0.52171168 |
| eqtl-a-ENSG00000128656 | ebi-a-GCST90018832 | Diabetic nephropathy || id:ebi-a-GCST90018832 | CHN1 | Inverse variance weighted | 4.89298237 | 5 | 0.42908002 |
| eqtl-a-ENSG00000130449 | ebi-a-GCST90018832 | Diabetic nephropathy || id:ebi-a-GCST90018832 | ZSWIM6 | Inverse variance weighted | 0.15698266 | 1 | 0.69194984 |
| eqtl-a-ENSG00000130844 | ebi-a-GCST90018832 | Diabetic nephropathy || id:ebi-a-GCST90018832 | ZNF331 | Inverse variance weighted | 0.18030192 | 1 | 0.67111391 |
| eqtl-a-ENSG00000131196 | ebi-a-GCST90018832 | Diabetic nephropathy || id:ebi-a-GCST90018832 | NFATC1 | Inverse variance weighted | 0.59881647 | 1 | 0.43902996 |
| eqtl-a-ENSG00000131323 | ebi-a-GCST90018832 | Diabetic nephropathy || id:ebi-a-GCST90018832 | TRAF3 | MR Egger | 5.45737348 | 3 | 0.1412105 |
| eqtl-a-ENSG00000131323 | ebi-a-GCST90018832 | Diabetic nephropathy || id:ebi-a-GCST90018832 | TRAF3 | Inverse variance weighted | 5.85030948 | 4 | 0.21060963 |
| eqtl-a-ENSG00000131378 | ebi-a-GCST90018832 | Diabetic nephropathy || id:ebi-a-GCST90018832 | RFTN1 | MR Egger | 0.01393085 | 1 | 0.90604465 |
| eqtl-a-ENSG00000131378 | ebi-a-GCST90018832 | Diabetic nephropathy || id:ebi-a-GCST90018832 | RFTN1 | Inverse variance weighted | 0.01394252 | 2 | 0.99305298 |
| eqtl-a-ENSG00000132510 | ebi-a-GCST90018832 | Diabetic nephropathy || id:ebi-a-GCST90018832 | KDM6B | Inverse variance weighted | 0.14743783 | 1 | 0.70099599 |
| eqtl-a-ENSG00000133962 | ebi-a-GCST90018832 | Diabetic nephropathy || id:ebi-a-GCST90018832 | CATSPERB | Inverse variance weighted | 2.21E-05 | 1 | 0.99624681 |
| eqtl-a-ENSG00000135040 | ebi-a-GCST90018832 | Diabetic nephropathy || id:ebi-a-GCST90018832 | NAA35 | Inverse variance weighted | 0.12740458 | 1 | 0.72113839 |
| eqtl-a-ENSG00000135114 | ebi-a-GCST90018832 | Diabetic nephropathy || id:ebi-a-GCST90018832 | OASL | MR Egger | 15.1759743 | 7 | 0.03380868 |
| eqtl-a-ENSG00000135114 | ebi-a-GCST90018832 | Diabetic nephropathy || id:ebi-a-GCST90018832 | OASL | Inverse variance weighted | 16.5503156 | 8 | 0.03514751 |
| eqtl-a-ENSG00000135249 | ebi-a-GCST90018832 | Diabetic nephropathy || id:ebi-a-GCST90018832 | RINT1 | MR Egger | 0.29758793 | 1 | 0.58539854 |
| eqtl-a-ENSG00000135249 | ebi-a-GCST90018832 | Diabetic nephropathy || id:ebi-a-GCST90018832 | RINT1 | Inverse variance weighted | 0.44601602 | 2 | 0.80010844 |
| eqtl-a-ENSG00000135541 | ebi-a-GCST90018832 | Diabetic nephropathy || id:ebi-a-GCST90018832 | AHI1 | MR Egger | 1.19214223 | 2 | 0.5509721 |
| eqtl-a-ENSG00000135541 | ebi-a-GCST90018832 | Diabetic nephropathy || id:ebi-a-GCST90018832 | AHI1 | Inverse variance weighted | 1.47912257 | 3 | 0.68709715 |
| eqtl-a-ENSG00000136052 | ebi-a-GCST90018832 | Diabetic nephropathy || id:ebi-a-GCST90018832 | SLC41A2 | MR Egger | 0.14645459 | 1 | 0.70194677 |
| eqtl-a-ENSG00000136052 | ebi-a-GCST90018832 | Diabetic nephropathy || id:ebi-a-GCST90018832 | SLC41A2 | Inverse variance weighted | 0.78958085 | 2 | 0.67382124 |
| eqtl-a-ENSG00000136603 | ebi-a-GCST90018832 | Diabetic nephropathy || id:ebi-a-GCST90018832 | SKIL | Inverse variance weighted | 0.0476816 | 1 | 0.82714772 |
| eqtl-a-ENSG00000137055 | ebi-a-GCST90018832 | Diabetic nephropathy || id:ebi-a-GCST90018832 | PLAA | Inverse variance weighted | 0.03340688 | 1 | 0.85497417 |
| eqtl-a-ENSG00000137601 | ebi-a-GCST90018832 | Diabetic nephropathy || id:ebi-a-GCST90018832 | NEK1 | Inverse variance weighted | 0.00218378 | 1 | 0.96272772 |
| eqtl-a-ENSG00000137656 | ebi-a-GCST90018832 | Diabetic nephropathy || id:ebi-a-GCST90018832 | BUD13 | Inverse variance weighted | 3.46524314 | 1 | 0.06267129 |
| eqtl-a-ENSG00000138074 | ebi-a-GCST90018832 | Diabetic nephropathy || id:ebi-a-GCST90018832 | SLC5A6 | MR Egger | 2.67147739 | 2 | 0.26296385 |
| eqtl-a-ENSG00000138074 | ebi-a-GCST90018832 | Diabetic nephropathy || id:ebi-a-GCST90018832 | SLC5A6 | Inverse variance weighted | 2.83267036 | 3 | 0.41814999 |
| eqtl-a-ENSG00000138378 | ebi-a-GCST90018832 | Diabetic nephropathy || id:ebi-a-GCST90018832 | STAT4 | Inverse variance weighted | 0.01853607 | 1 | 0.89170489 |
| eqtl-a-ENSG00000138399 | ebi-a-GCST90018832 | Diabetic nephropathy || id:ebi-a-GCST90018832 | FASTKD1 | MR Egger | 0.49172228 | 1 | 0.48316004 |
| eqtl-a-ENSG00000138399 | ebi-a-GCST90018832 | Diabetic nephropathy || id:ebi-a-GCST90018832 | FASTKD1 | Inverse variance weighted | 2.97659126 | 2 | 0.2257571 |
| eqtl-a-ENSG00000139044 | ebi-a-GCST90018832 | Diabetic nephropathy || id:ebi-a-GCST90018832 | B4GALNT3 | MR Egger | 0.43859727 | 1 | 0.50780027 |
| eqtl-a-ENSG00000139044 | ebi-a-GCST90018832 | Diabetic nephropathy || id:ebi-a-GCST90018832 | B4GALNT3 | Inverse variance weighted | 1.31319438 | 2 | 0.51861308 |
| eqtl-a-ENSG00000139514 | ebi-a-GCST90018832 | Diabetic nephropathy || id:ebi-a-GCST90018832 | SLC7A1 | MR Egger | 1.07779723 | 2 | 0.58339044 |
| eqtl-a-ENSG00000139514 | ebi-a-GCST90018832 | Diabetic nephropathy || id:ebi-a-GCST90018832 | SLC7A1 | Inverse variance weighted | 1.89058869 | 3 | 0.59542292 |
| eqtl-a-ENSG00000140470 | ebi-a-GCST90018832 | Diabetic nephropathy || id:ebi-a-GCST90018832 | ADAMTS17 | MR Egger | 0.78349697 | 1 | 0.37607377 |
| eqtl-a-ENSG00000140470 | ebi-a-GCST90018832 | Diabetic nephropathy || id:ebi-a-GCST90018832 | ADAMTS17 | Inverse variance weighted | 1.18591338 | 2 | 0.55269073 |
| eqtl-a-ENSG00000141543 | ebi-a-GCST90018832 | Diabetic nephropathy || id:ebi-a-GCST90018832 | EIF4A3 | Inverse variance weighted | 0.07832492 | 1 | 0.7795804 |
| eqtl-a-ENSG00000141968 | ebi-a-GCST90018832 | Diabetic nephropathy || id:ebi-a-GCST90018832 | VAV1 | Inverse variance weighted | 0.10305713 | 1 | 0.74819136 |
| eqtl-a-ENSG00000142039 | ebi-a-GCST90018832 | Diabetic nephropathy || id:ebi-a-GCST90018832 | CCDC97 | Inverse variance weighted | 1.13505099 | 1 | 0.28670051 |
| eqtl-a-ENSG00000143384 | ebi-a-GCST90018832 | Diabetic nephropathy || id:ebi-a-GCST90018832 | ADAMTSL4-AS1 | MR Egger | 0.01935935 | 1 | 0.8893412 |
| eqtl-a-ENSG00000143384 | ebi-a-GCST90018832 | Diabetic nephropathy || id:ebi-a-GCST90018832 | ADAMTSL4-AS1 | Inverse variance weighted | 0.13951006 | 2 | 0.93262225 |
| eqtl-a-ENSG00000143924 | ebi-a-GCST90018832 | Diabetic nephropathy || id:ebi-a-GCST90018832 | EML4 | MR Egger | 2.40079906 | 2 | 0.3010739 |
| eqtl-a-ENSG00000143924 | ebi-a-GCST90018832 | Diabetic nephropathy || id:ebi-a-GCST90018832 | EML4 | Inverse variance weighted | 3.4358189 | 3 | 0.32918209 |
| eqtl-a-ENSG00000144655 | ebi-a-GCST90018832 | Diabetic nephropathy || id:ebi-a-GCST90018832 | CSRNP1 | MR Egger | 0.29054801 | 1 | 0.58986957 |
| eqtl-a-ENSG00000144655 | ebi-a-GCST90018832 | Diabetic nephropathy || id:ebi-a-GCST90018832 | CSRNP1 | Inverse variance weighted | 1.45698815 | 2 | 0.48263526 |
| eqtl-a-ENSG00000146350 | ebi-a-GCST90018832 | Diabetic nephropathy || id:ebi-a-GCST90018832 | TBC1D32 | Inverse variance weighted | 6.841697 | 1 | 0.00890542 |
| eqtl-a-ENSG00000149262 | ebi-a-GCST90018832 | Diabetic nephropathy || id:ebi-a-GCST90018832 | INTS4 | MR Egger | 0.00390578 | 1 | 0.95016764 |
| eqtl-a-ENSG00000149262 | ebi-a-GCST90018832 | Diabetic nephropathy || id:ebi-a-GCST90018832 | INTS4 | Inverse variance weighted | 0.00600452 | 2 | 0.99700224 |
| eqtl-a-ENSG00000151327 | ebi-a-GCST90018832 | Diabetic nephropathy || id:ebi-a-GCST90018832 | FAM177A1 | MR Egger | 0.00954239 | 1 | 0.92218229 |
| eqtl-a-ENSG00000151327 | ebi-a-GCST90018832 | Diabetic nephropathy || id:ebi-a-GCST90018832 | FAM177A1 | Inverse variance weighted | 0.14316964 | 2 | 0.93091731 |
| eqtl-a-ENSG00000151466 | ebi-a-GCST90018832 | Diabetic nephropathy || id:ebi-a-GCST90018832 | SCLT1 | MR Egger | 0.77673411 | 1 | 0.37814183 |
| eqtl-a-ENSG00000151466 | ebi-a-GCST90018832 | Diabetic nephropathy || id:ebi-a-GCST90018832 | SCLT1 | Inverse variance weighted | 3.74552384 | 2 | 0.15369857 |
| eqtl-a-ENSG00000152409 | ebi-a-GCST90018832 | Diabetic nephropathy || id:ebi-a-GCST90018832 | JMY | Inverse variance weighted | 0.29449273 | 1 | 0.58735576 |
| eqtl-a-ENSG00000152969 | ebi-a-GCST90018832 | Diabetic nephropathy || id:ebi-a-GCST90018832 | JAKMIP1 | Inverse variance weighted | 0.74909889 | 1 | 0.38676168 |
| eqtl-a-ENSG00000154645 | ebi-a-GCST90018832 | Diabetic nephropathy || id:ebi-a-GCST90018832 | CHODL | Inverse variance weighted | 1.41333028 | 1 | 0.23450433 |
| eqtl-a-ENSG00000156110 | ebi-a-GCST90018832 | Diabetic nephropathy || id:ebi-a-GCST90018832 | ADK | MR Egger | 2.41930626 | 5 | 0.78859561 |
| eqtl-a-ENSG00000156110 | ebi-a-GCST90018832 | Diabetic nephropathy || id:ebi-a-GCST90018832 | ADK | Inverse variance weighted | 6.05199762 | 6 | 0.41739057 |
| eqtl-a-ENSG00000158321 | ebi-a-GCST90018832 | Diabetic nephropathy || id:ebi-a-GCST90018832 | AUTS2 | MR Egger | 10.0081695 | 8 | 0.26445299 |
| eqtl-a-ENSG00000158321 | ebi-a-GCST90018832 | Diabetic nephropathy || id:ebi-a-GCST90018832 | AUTS2 | Inverse variance weighted | 10.068477 | 9 | 0.34497013 |
| eqtl-a-ENSG00000159459 | ebi-a-GCST90018832 | Diabetic nephropathy || id:ebi-a-GCST90018832 | UBR1 | Inverse variance weighted | 3.44592701 | 1 | 0.06340784 |
| eqtl-a-ENSG00000159733 | ebi-a-GCST90018832 | Diabetic nephropathy || id:ebi-a-GCST90018832 | ZFYVE28 | Inverse variance weighted | 2.23594505 | 1 | 0.13483416 |
| eqtl-a-ENSG00000160307 | ebi-a-GCST90018832 | Diabetic nephropathy || id:ebi-a-GCST90018832 | S100B | MR Egger | 2.99039971 | 4 | 0.55943327 |
| eqtl-a-ENSG00000160307 | ebi-a-GCST90018832 | Diabetic nephropathy || id:ebi-a-GCST90018832 | S100B | Inverse variance weighted | 7.24806721 | 5 | 0.20283526 |
| eqtl-a-ENSG00000160789 | ebi-a-GCST90018832 | Diabetic nephropathy || id:ebi-a-GCST90018832 | LMNA | MR Egger | 8.1606572 | 6 | 0.22656791 |
| eqtl-a-ENSG00000160789 | ebi-a-GCST90018832 | Diabetic nephropathy || id:ebi-a-GCST90018832 | LMNA | Inverse variance weighted | 9.05640265 | 7 | 0.2486319 |
| eqtl-a-ENSG00000162415 | ebi-a-GCST90018832 | Diabetic nephropathy || id:ebi-a-GCST90018832 | ZSWIM5 | Inverse variance weighted | 0.14956071 | 1 | 0.69895552 |
| eqtl-a-ENSG00000163421 | ebi-a-GCST90018832 | Diabetic nephropathy || id:ebi-a-GCST90018832 | PROK2 | MR Egger | 15.5535304 | 10 | 0.11314636 |
| eqtl-a-ENSG00000163421 | ebi-a-GCST90018832 | Diabetic nephropathy || id:ebi-a-GCST90018832 | PROK2 | Inverse variance weighted | 16.3605106 | 11 | 0.12826593 |
| eqtl-a-ENSG00000163600 | ebi-a-GCST90018832 | Diabetic nephropathy || id:ebi-a-GCST90018832 | ICOS | MR Egger | 0.2745336 | 1 | 0.60030668 |
| eqtl-a-ENSG00000163600 | ebi-a-GCST90018832 | Diabetic nephropathy || id:ebi-a-GCST90018832 | ICOS | Inverse variance weighted | 1.09439195 | 2 | 0.57856986 |
| eqtl-a-ENSG00000163659 | ebi-a-GCST90018832 | Diabetic nephropathy || id:ebi-a-GCST90018832 | TIPARP | MR Egger | 0.66588418 | 3 | 0.88119746 |
| eqtl-a-ENSG00000163659 | ebi-a-GCST90018832 | Diabetic nephropathy || id:ebi-a-GCST90018832 | TIPARP | Inverse variance weighted | 2.98091159 | 4 | 0.56102487 |
| eqtl-a-ENSG00000164048 | ebi-a-GCST90018832 | Diabetic nephropathy || id:ebi-a-GCST90018832 | ZNF589 | MR Egger | 1.19517155 | 1 | 0.27428887 |
| eqtl-a-ENSG00000164048 | ebi-a-GCST90018832 | Diabetic nephropathy || id:ebi-a-GCST90018832 | ZNF589 | Inverse variance weighted | 1.1952172 | 2 | 0.55012564 |
| eqtl-a-ENSG00000164574 | ebi-a-GCST90018832 | Diabetic nephropathy || id:ebi-a-GCST90018832 | GALNT10 | MR Egger | 2.10014107 | 2 | 0.34991307 |
| eqtl-a-ENSG00000164574 | ebi-a-GCST90018832 | Diabetic nephropathy || id:ebi-a-GCST90018832 | GALNT10 | Inverse variance weighted | 2.61615531 | 3 | 0.45466435 |
| eqtl-a-ENSG00000166377 | ebi-a-GCST90018832 | Diabetic nephropathy || id:ebi-a-GCST90018832 | ATP9B | MR Egger | 1.0583667 | 1 | 0.303588 |
| eqtl-a-ENSG00000166377 | ebi-a-GCST90018832 | Diabetic nephropathy || id:ebi-a-GCST90018832 | ATP9B | Inverse variance weighted | 2.04451608 | 2 | 0.35978162 |
| eqtl-a-ENSG00000167094 | ebi-a-GCST90018832 | Diabetic nephropathy || id:ebi-a-GCST90018832 | TTC16 | MR Egger | 1.40480643 | 2 | 0.49539334 |
| eqtl-a-ENSG00000167094 | ebi-a-GCST90018832 | Diabetic nephropathy || id:ebi-a-GCST90018832 | TTC16 | Inverse variance weighted | 1.40587274 | 3 | 0.70415871 |
| eqtl-a-ENSG00000167325 | ebi-a-GCST90018832 | Diabetic nephropathy || id:ebi-a-GCST90018832 | RRM1 | MR Egger | 0.33752614 | 2 | 0.84470902 |
| eqtl-a-ENSG00000167325 | ebi-a-GCST90018832 | Diabetic nephropathy || id:ebi-a-GCST90018832 | RRM1 | Inverse variance weighted | 4.15662986 | 3 | 0.24504009 |
| eqtl-a-ENSG00000167552 | ebi-a-GCST90018832 | Diabetic nephropathy || id:ebi-a-GCST90018832 | TUBA1A | Inverse variance weighted | 0.46589634 | 1 | 0.49488113 |
| eqtl-a-ENSG00000168026 | ebi-a-GCST90018832 | Diabetic nephropathy || id:ebi-a-GCST90018832 | TTC21A | MR Egger | 2.01725273 | 1 | 0.1555203 |
| eqtl-a-ENSG00000168026 | ebi-a-GCST90018832 | Diabetic nephropathy || id:ebi-a-GCST90018832 | TTC21A | Inverse variance weighted | 2.47375873 | 2 | 0.29028869 |
| eqtl-a-ENSG00000171033 | ebi-a-GCST90018832 | Diabetic nephropathy || id:ebi-a-GCST90018832 | PKIA | MR Egger | 7.98245502 | 7 | 0.33414355 |
| eqtl-a-ENSG00000171033 | ebi-a-GCST90018832 | Diabetic nephropathy || id:ebi-a-GCST90018832 | PKIA | Inverse variance weighted | 8.03008147 | 8 | 0.4305372 |
| eqtl-a-ENSG00000171208 | ebi-a-GCST90018832 | Diabetic nephropathy || id:ebi-a-GCST90018832 | NETO2 | Inverse variance weighted | 0.15228656 | 1 | 0.69635975 |
| eqtl-a-ENSG00000171723 | ebi-a-GCST90018832 | Diabetic nephropathy || id:ebi-a-GCST90018832 | GPHN | MR Egger | 2.05192907 | 1 | 0.15201347 |
| eqtl-a-ENSG00000171723 | ebi-a-GCST90018832 | Diabetic nephropathy || id:ebi-a-GCST90018832 | GPHN | Inverse variance weighted | 2.14709616 | 2 | 0.34179365 |
| eqtl-a-ENSG00000173226 | ebi-a-GCST90018832 | Diabetic nephropathy || id:ebi-a-GCST90018832 | IQCB1 | MR Egger | 7.240792 | 3 | 0.06460633 |
| eqtl-a-ENSG00000173226 | ebi-a-GCST90018832 | Diabetic nephropathy || id:ebi-a-GCST90018832 | IQCB1 | Inverse variance weighted | 7.94927737 | 4 | 0.093454 |
| eqtl-a-ENSG00000173588 | ebi-a-GCST90018832 | Diabetic nephropathy || id:ebi-a-GCST90018832 | CEP83 | MR Egger | 1.21523032 | 1 | 0.27029874 |
| eqtl-a-ENSG00000173588 | ebi-a-GCST90018832 | Diabetic nephropathy || id:ebi-a-GCST90018832 | CEP83 | Inverse variance weighted | 2.76467479 | 2 | 0.2509912 |
| eqtl-a-ENSG00000174007 | ebi-a-GCST90018832 | Diabetic nephropathy || id:ebi-a-GCST90018832 | CEP19 | MR Egger | 1.47642471 | 4 | 0.83080917 |
| eqtl-a-ENSG00000174007 | ebi-a-GCST90018832 | Diabetic nephropathy || id:ebi-a-GCST90018832 | CEP19 | Inverse variance weighted | 1.48748243 | 5 | 0.9145098 |
| eqtl-a-ENSG00000175197 | ebi-a-GCST90018832 | Diabetic nephropathy || id:ebi-a-GCST90018832 | DDIT3 | MR Egger | 3.96681256 | 1 | 0.04640554 |
| eqtl-a-ENSG00000175197 | ebi-a-GCST90018832 | Diabetic nephropathy || id:ebi-a-GCST90018832 | DDIT3 | Inverse variance weighted | 6.18738688 | 2 | 0.04533421 |
| eqtl-a-ENSG00000175931 | ebi-a-GCST90018832 | Diabetic nephropathy || id:ebi-a-GCST90018832 | UBE2O | MR Egger | 1.91345319 | 2 | 0.3841483 |
| eqtl-a-ENSG00000175931 | ebi-a-GCST90018832 | Diabetic nephropathy || id:ebi-a-GCST90018832 | UBE2O | Inverse variance weighted | 2.62090643 | 3 | 0.45383616 |
| eqtl-a-ENSG00000176095 | ebi-a-GCST90018832 | Diabetic nephropathy || id:ebi-a-GCST90018832 | IP6K1 | MR Egger | 3.32538249 | 1 | 0.06821815 |
| eqtl-a-ENSG00000176095 | ebi-a-GCST90018832 | Diabetic nephropathy || id:ebi-a-GCST90018832 | IP6K1 | Inverse variance weighted | 3.3992515 | 2 | 0.18275191 |
| eqtl-a-ENSG00000176531 | ebi-a-GCST90018832 | Diabetic nephropathy || id:ebi-a-GCST90018832 | PHLDB3 | MR Egger | 0.00218981 | 1 | 0.96267633 |
| eqtl-a-ENSG00000176531 | ebi-a-GCST90018832 | Diabetic nephropathy || id:ebi-a-GCST90018832 | PHLDB3 | Inverse variance weighted | 0.58090916 | 2 | 0.7479235 |
| eqtl-a-ENSG00000178623 | ebi-a-GCST90018832 | Diabetic nephropathy || id:ebi-a-GCST90018832 | GPR35 | MR Egger | 0.58900849 | 1 | 0.44280279 |
| eqtl-a-ENSG00000178623 | ebi-a-GCST90018832 | Diabetic nephropathy || id:ebi-a-GCST90018832 | GPR35 | Inverse variance weighted | 0.59066454 | 2 | 0.74428424 |
| eqtl-a-ENSG00000178764 | ebi-a-GCST90018832 | Diabetic nephropathy || id:ebi-a-GCST90018832 | ZHX2 | Inverse variance weighted | 1.64398028 | 1 | 0.19978023 |
| eqtl-a-ENSG00000179820 | ebi-a-GCST90018832 | Diabetic nephropathy || id:ebi-a-GCST90018832 | MYADM | MR Egger | 8.36033159 | 4 | 0.07923567 |
| eqtl-a-ENSG00000179820 | ebi-a-GCST90018832 | Diabetic nephropathy || id:ebi-a-GCST90018832 | MYADM | Inverse variance weighted | 8.56178722 | 5 | 0.12787221 |
| eqtl-a-ENSG00000180875 | ebi-a-GCST90018832 | Diabetic nephropathy || id:ebi-a-GCST90018832 | GREM2 | MR Egger | 0.61051816 | 1 | 0.43459278 |
| eqtl-a-ENSG00000180875 | ebi-a-GCST90018832 | Diabetic nephropathy || id:ebi-a-GCST90018832 | GREM2 | Inverse variance weighted | 0.78614191 | 2 | 0.67498085 |
| eqtl-a-ENSG00000182463 | ebi-a-GCST90018832 | Diabetic nephropathy || id:ebi-a-GCST90018832 | TSHZ2 | MR Egger | 9.51233793 | 6 | 0.14674816 |
| eqtl-a-ENSG00000182463 | ebi-a-GCST90018832 | Diabetic nephropathy || id:ebi-a-GCST90018832 | TSHZ2 | Inverse variance weighted | 12.4945437 | 7 | 0.08542416 |
| eqtl-a-ENSG00000183049 | ebi-a-GCST90018832 | Diabetic nephropathy || id:ebi-a-GCST90018832 | CAMK1D | MR Egger | 10.3071777 | 5 | 0.06698492 |
| eqtl-a-ENSG00000183049 | ebi-a-GCST90018832 | Diabetic nephropathy || id:ebi-a-GCST90018832 | CAMK1D | Inverse variance weighted | 10.3166941 | 6 | 0.11193338 |
| eqtl-a-ENSG00000183570 | ebi-a-GCST90018832 | Diabetic nephropathy || id:ebi-a-GCST90018832 | PCBP3 | MR Egger | 5.40164215 | 2 | 0.06715036 |
| eqtl-a-ENSG00000183570 | ebi-a-GCST90018832 | Diabetic nephropathy || id:ebi-a-GCST90018832 | PCBP3 | Inverse variance weighted | 7.52186039 | 3 | 0.05699942 |
| eqtl-a-ENSG00000184178 | ebi-a-GCST90018832 | Diabetic nephropathy || id:ebi-a-GCST90018832 | SCFD2 | MR Egger | 0.03310482 | 1 | 0.85562408 |
| eqtl-a-ENSG00000184178 | ebi-a-GCST90018832 | Diabetic nephropathy || id:ebi-a-GCST90018832 | SCFD2 | Inverse variance weighted | 2.73248099 | 2 | 0.25506407 |
| eqtl-a-ENSG00000184220 | ebi-a-GCST90018832 | Diabetic nephropathy || id:ebi-a-GCST90018832 | CMSS1 | MR Egger | 0.84574678 | 2 | 0.65516158 |
| eqtl-a-ENSG00000184220 | ebi-a-GCST90018832 | Diabetic nephropathy || id:ebi-a-GCST90018832 | CMSS1 | Inverse variance weighted | 0.84617713 | 3 | 0.83839313 |
| eqtl-a-ENSG00000184588 | ebi-a-GCST90018832 | Diabetic nephropathy || id:ebi-a-GCST90018832 | PDE4B | MR Egger | 0.02858347 | 1 | 0.86574436 |
| eqtl-a-ENSG00000184588 | ebi-a-GCST90018832 | Diabetic nephropathy || id:ebi-a-GCST90018832 | PDE4B | Inverse variance weighted | 0.23240741 | 2 | 0.89029385 |
| eqtl-a-ENSG00000186469 | ebi-a-GCST90018832 | Diabetic nephropathy || id:ebi-a-GCST90018832 | GNG2 | MR Egger | 0.93943341 | 1 | 0.3324236 |
| eqtl-a-ENSG00000186469 | ebi-a-GCST90018832 | Diabetic nephropathy || id:ebi-a-GCST90018832 | GNG2 | Inverse variance weighted | 0.95794542 | 2 | 0.61941939 |
| eqtl-a-ENSG00000187010 | ebi-a-GCST90018832 | Diabetic nephropathy || id:ebi-a-GCST90018832 | RHD | MR Egger | 2.25129875 | 3 | 0.52191492 |
| eqtl-a-ENSG00000187010 | ebi-a-GCST90018832 | Diabetic nephropathy || id:ebi-a-GCST90018832 | RHD | Inverse variance weighted | 2.26354483 | 4 | 0.68741392 |
| eqtl-a-ENSG00000187260 | ebi-a-GCST90018832 | Diabetic nephropathy || id:ebi-a-GCST90018832 | WDR86 | MR Egger | 0.10809777 | 1 | 0.74232028 |
| eqtl-a-ENSG00000187260 | ebi-a-GCST90018832 | Diabetic nephropathy || id:ebi-a-GCST90018832 | WDR86 | Inverse variance weighted | 0.10833663 | 2 | 0.94727265 |
| eqtl-a-ENSG00000196189 | ebi-a-GCST90018832 | Diabetic nephropathy || id:ebi-a-GCST90018832 | SEMA4A | MR Egger | 4.18162677 | 10 | 0.93878169 |
| eqtl-a-ENSG00000196189 | ebi-a-GCST90018832 | Diabetic nephropathy || id:ebi-a-GCST90018832 | SEMA4A | Inverse variance weighted | 4.32979533 | 11 | 0.95925846 |
| eqtl-a-ENSG00000196352 | ebi-a-GCST90018832 | Diabetic nephropathy || id:ebi-a-GCST90018832 | CD55 | MR Egger | 2.80823937 | 4 | 0.59041129 |
| eqtl-a-ENSG00000196352 | ebi-a-GCST90018832 | Diabetic nephropathy || id:ebi-a-GCST90018832 | CD55 | Inverse variance weighted | 18.7474909 | 5 | 0.00214176 |
| eqtl-a-ENSG00000196843 | ebi-a-GCST90018832 | Diabetic nephropathy || id:ebi-a-GCST90018832 | ARID5A | Inverse variance weighted | 0.1688143 | 1 | 0.68116773 |
| eqtl-a-ENSG00000197121 | ebi-a-GCST90018832 | Diabetic nephropathy || id:ebi-a-GCST90018832 | PGAP1 | MR Egger | 0.3446245 | 1 | 0.55717196 |
| eqtl-a-ENSG00000197121 | ebi-a-GCST90018832 | Diabetic nephropathy || id:ebi-a-GCST90018832 | PGAP1 | Inverse variance weighted | 0.35597403 | 2 | 0.83695329 |
| eqtl-a-ENSG00000197279 | ebi-a-GCST90018832 | Diabetic nephropathy || id:ebi-a-GCST90018832 | ZNF165 | MR Egger | 0.81152691 | 1 | 0.36766921 |
| eqtl-a-ENSG00000197279 | ebi-a-GCST90018832 | Diabetic nephropathy || id:ebi-a-GCST90018832 | ZNF165 | Inverse variance weighted | 0.82610035 | 2 | 0.66162909 |
| eqtl-a-ENSG00000198380 | ebi-a-GCST90018832 | Diabetic nephropathy || id:ebi-a-GCST90018832 | GFPT1 | MR Egger | 1.42672363 | 2 | 0.48999416 |
| eqtl-a-ENSG00000198380 | ebi-a-GCST90018832 | Diabetic nephropathy || id:ebi-a-GCST90018832 | GFPT1 | Inverse variance weighted | 1.46065799 | 3 | 0.69137975 |
| eqtl-a-ENSG00000198848 | ebi-a-GCST90018832 | Diabetic nephropathy || id:ebi-a-GCST90018832 | CES1 | MR Egger | 2.28724494 | 3 | 0.51496884 |
| eqtl-a-ENSG00000198848 | ebi-a-GCST90018832 | Diabetic nephropathy || id:ebi-a-GCST90018832 | CES1 | Inverse variance weighted | 3.18890068 | 4 | 0.52672554 |
| eqtl-a-ENSG00000204178 | ebi-a-GCST90018832 | Diabetic nephropathy || id:ebi-a-GCST90018832 | MACO1 | Inverse variance weighted | 0.68354569 | 1 | 0.40836845 |
| eqtl-a-ENSG00000204519 | ebi-a-GCST90018832 | Diabetic nephropathy || id:ebi-a-GCST90018832 | ZNF551 | MR Egger | 0.32073547 | 1 | 0.57116599 |
| eqtl-a-ENSG00000204519 | ebi-a-GCST90018832 | Diabetic nephropathy || id:ebi-a-GCST90018832 | ZNF551 | Inverse variance weighted | 0.32374492 | 2 | 0.85054968 |
| eqtl-a-ENSG00000211778 | ebi-a-GCST90018832 | Diabetic nephropathy || id:ebi-a-GCST90018832 | TRAV4 | MR Egger | 2.41593944 | 1 | 0.1201059 |
| eqtl-a-ENSG00000211778 | ebi-a-GCST90018832 | Diabetic nephropathy || id:ebi-a-GCST90018832 | TRAV4 | Inverse variance weighted | 2.46480978 | 2 | 0.29159049 |
| eqtl-a-ENSG00000211780 | ebi-a-GCST90018832 | Diabetic nephropathy || id:ebi-a-GCST90018832 | TRAV6 | MR Egger | 0.06057455 | 1 | 0.80559014 |
| eqtl-a-ENSG00000211780 | ebi-a-GCST90018832 | Diabetic nephropathy || id:ebi-a-GCST90018832 | TRAV6 | Inverse variance weighted | 3.65513466 | 2 | 0.16080428 |
| eqtl-a-ENSG00000213639 | ebi-a-GCST90018832 | Diabetic nephropathy || id:ebi-a-GCST90018832 | PPP1CB | MR Egger | 0.07772265 | 1 | 0.78040766 |
| eqtl-a-ENSG00000213639 | ebi-a-GCST90018832 | Diabetic nephropathy || id:ebi-a-GCST90018832 | PPP1CB | Inverse variance weighted | 0.07829173 | 2 | 0.96161044 |
| eqtl-a-ENSG00000215244 | ebi-a-GCST90018832 | Diabetic nephropathy || id:ebi-a-GCST90018832 | LINC02649 | MR Egger | 0.29859612 | 2 | 0.86131235 |
| eqtl-a-ENSG00000215244 | ebi-a-GCST90018832 | Diabetic nephropathy || id:ebi-a-GCST90018832 | LINC02649 | Inverse variance weighted | 0.75146801 | 3 | 0.86103645 |
| eqtl-a-ENSG00000231074 | ebi-a-GCST90018832 | Diabetic nephropathy || id:ebi-a-GCST90018832 | HCG18 | MR Egger | 0.00056643 | 1 | 0.98101236 |
| eqtl-a-ENSG00000231074 | ebi-a-GCST90018832 | Diabetic nephropathy || id:ebi-a-GCST90018832 | HCG18 | Inverse variance weighted | 0.11070017 | 2 | 0.94615386 |
| eqtl-a-ENSG00000231682 | ebi-a-GCST90018832 | Diabetic nephropathy || id:ebi-a-GCST90018832 | LINC01891 | Inverse variance weighted | 2.89350755 | 1 | 0.08893711 |
| eqtl-a-ENSG00000233806 | ebi-a-GCST90018832 | Diabetic nephropathy || id:ebi-a-GCST90018832 | LINC01237 | Inverse variance weighted | 0.29230991 | 1 | 0.58874408 |
| eqtl-a-ENSG00000238197 | ebi-a-GCST90018832 | Diabetic nephropathy || id:ebi-a-GCST90018832 | PAXBP1-AS1 | Inverse variance weighted | 0.52637279 | 1 | 0.46813582 |
| eqtl-a-ENSG00000239653 | ebi-a-GCST90018832 | Diabetic nephropathy || id:ebi-a-GCST90018832 | PSMD6-AS2 | Inverse variance weighted | 0.15875336 | 1 | 0.69030687 |
| eqtl-a-ENSG00000239704 | ebi-a-GCST90018832 | Diabetic nephropathy || id:ebi-a-GCST90018832 | CDRT4 | Inverse variance weighted | 0.00011579 | 1 | 0.99141431 |
| eqtl-a-ENSG00000245105 | ebi-a-GCST90018832 | Diabetic nephropathy || id:ebi-a-GCST90018832 | A2M-AS1 | Inverse variance weighted | 0.1418526 | 1 | 0.70644618 |
| eqtl-a-ENSG00000256223 | ebi-a-GCST90018832 | Diabetic nephropathy || id:ebi-a-GCST90018832 | ZNF10 | Inverse variance weighted | 0.21126765 | 1 | 0.64577564 |
