# Supplementary material for: Aging-related CD8 + T cell alterations and calcium/calmodulin dependent protein kinase 1D activation in the pathogenesis of diabetic kidney disease
Source: PeerJ journal article supplement (doi:10.7717/peerj.20762), 2026-02-13
Supplement: Supplementary_table_8.docx [file Supplementary_table_8.docx]

**Supplementary table 8** Pleiotropy

| Id.exposure | Id.outcome | Outcome | Exposure | Egger_intercept | Se | Pval |
| --- | --- | --- | --- | --- | --- | --- |
| eqtl-a-ENSG00000010810 | ebi-a-GCST90018832 | Diabetic nephropathy || id:ebi-a-GCST90018832 | FYN | -0.0121291 | 0.09334234 | 0.91773694 |
| eqtl-a-ENSG00000013725 | ebi-a-GCST90018832 | Diabetic nephropathy || id:ebi-a-GCST90018832 | CD6 | -0.0684453 | 0.03803663 | 0.13184955 |
| eqtl-a-ENSG00000023171 | ebi-a-GCST90018832 | Diabetic nephropathy || id:ebi-a-GCST90018832 | GRAMD1B | -0.1212827 | 0.18178894 | 0.57333931 |
| eqtl-a-ENSG00000026652 | ebi-a-GCST90018832 | Diabetic nephropathy || id:ebi-a-GCST90018832 | AGPAT4 | -0.0322946 | 0.06951302 | 0.67387045 |
| eqtl-a-ENSG00000047056 | ebi-a-GCST90018832 | Diabetic nephropathy || id:ebi-a-GCST90018832 | WDR37 | 0.09693556 | 0.1113115 | 0.4756562 |
| eqtl-a-ENSG00000050344 | ebi-a-GCST90018832 | Diabetic nephropathy || id:ebi-a-GCST90018832 | NFE2L3 | 0.03780944 | 0.06250354 | 0.6536617 |
| eqtl-a-ENSG00000052749 | ebi-a-GCST90018832 | Diabetic nephropathy || id:ebi-a-GCST90018832 | RRP12 | -0.0488538 | 0.02387097 | 0.07993307 |
| eqtl-a-ENSG00000054392 | ebi-a-GCST90018832 | Diabetic nephropathy || id:ebi-a-GCST90018832 | HHAT | NA | NA | NA |
| eqtl-a-ENSG00000054611 | ebi-a-GCST90018832 | Diabetic nephropathy || id:ebi-a-GCST90018832 | TBC1D22A | NA | NA | NA |
| eqtl-a-ENSG00000055483 | ebi-a-GCST90018832 | Diabetic nephropathy || id:ebi-a-GCST90018832 | USP36 | -0.111738 | 0.13349922 | 0.49067468 |
| eqtl-a-ENSG00000065911 | ebi-a-GCST90018832 | Diabetic nephropathy || id:ebi-a-GCST90018832 | MTHFD2 | NA | NA | NA |
| eqtl-a-ENSG00000065989 | ebi-a-GCST90018832 | Diabetic nephropathy || id:ebi-a-GCST90018832 | PDE4A | 0.03789607 | 0.07166297 | 0.69032984 |
| eqtl-a-ENSG00000066855 | ebi-a-GCST90018832 | Diabetic nephropathy || id:ebi-a-GCST90018832 | MTFR1 | NA | NA | NA |
| eqtl-a-ENSG00000069399 | ebi-a-GCST90018832 | Diabetic nephropathy || id:ebi-a-GCST90018832 | BCL3 | 0.10340471 | 0.17318582 | 0.6573298 |
| eqtl-a-ENSG00000069849 | ebi-a-GCST90018832 | Diabetic nephropathy || id:ebi-a-GCST90018832 | ATP1B3 | NA | NA | NA |
| eqtl-a-ENSG00000070495 | ebi-a-GCST90018832 | Diabetic nephropathy || id:ebi-a-GCST90018832 | JMJD6 | -0.2391225 | 0.20377818 | 0.4493039 |
| eqtl-a-ENSG00000070718 | ebi-a-GCST90018832 | Diabetic nephropathy || id:ebi-a-GCST90018832 | AP3M2 | -0.0612907 | 0.05561101 | 0.35088821 |
| eqtl-a-ENSG00000071205 | ebi-a-GCST90018832 | Diabetic nephropathy || id:ebi-a-GCST90018832 | ARHGAP10 | -0.0311676 | 0.07545929 | 0.75063903 |
| eqtl-a-ENSG00000074621 | ebi-a-GCST90018832 | Diabetic nephropathy || id:ebi-a-GCST90018832 | SLC24A1 | NA | NA | NA |
| eqtl-a-ENSG00000080298 | ebi-a-GCST90018832 | Diabetic nephropathy || id:ebi-a-GCST90018832 | RFX3 | NA | NA | NA |
| eqtl-a-ENSG00000085433 | ebi-a-GCST90018832 | Diabetic nephropathy || id:ebi-a-GCST90018832 | WDR47 | NA | NA | NA |
| eqtl-a-ENSG00000089902 | ebi-a-GCST90018832 | Diabetic nephropathy || id:ebi-a-GCST90018832 | RCOR1 | NA | NA | NA |
| eqtl-a-ENSG00000092020 | ebi-a-GCST90018832 | Diabetic nephropathy || id:ebi-a-GCST90018832 | PPP2R3C | 0.19336738 | 0.11065297 | 0.1554674 |
| eqtl-a-ENSG00000092820 | ebi-a-GCST90018832 | Diabetic nephropathy || id:ebi-a-GCST90018832 | EZR | NA | NA | NA |
| eqtl-a-ENSG00000095397 | ebi-a-GCST90018832 | Diabetic nephropathy || id:ebi-a-GCST90018832 | WHRN | NA | NA | NA |
| eqtl-a-ENSG00000099995 | ebi-a-GCST90018832 | Diabetic nephropathy || id:ebi-a-GCST90018832 | SF3A1 | -0.0230714 | 0.0379846 | 0.57011781 |
| eqtl-a-ENSG00000100290 | ebi-a-GCST90018832 | Diabetic nephropathy || id:ebi-a-GCST90018832 | BIK | 0.06274981 | 0.09238859 | 0.62017636 |
| eqtl-a-ENSG00000100450 | ebi-a-GCST90018832 | Diabetic nephropathy || id:ebi-a-GCST90018832 | GZMH | -0.121459 | 0.07972483 | 0.20231067 |
| eqtl-a-ENSG00000100991 | ebi-a-GCST90018832 | Diabetic nephropathy || id:ebi-a-GCST90018832 | TRPC4AP | 0.05299992 | 0.04646022 | 0.3056463 |
| eqtl-a-ENSG00000101695 | ebi-a-GCST90018832 | Diabetic nephropathy || id:ebi-a-GCST90018832 | RNF125 | NA | NA | NA |
| eqtl-a-ENSG00000102760 | ebi-a-GCST90018832 | Diabetic nephropathy || id:ebi-a-GCST90018832 | RGCC | 0.0874143 | 0.04642557 | 0.20041708 |
| eqtl-a-ENSG00000103257 | ebi-a-GCST90018832 | Diabetic nephropathy || id:ebi-a-GCST90018832 | SLC7A5 | 0.04769811 | 0.05325594 | 0.41148558 |
| eqtl-a-ENSG00000103342 | ebi-a-GCST90018832 | Diabetic nephropathy || id:ebi-a-GCST90018832 | GSPT1 | 0.06016354 | 0.0344081 | 0.1238587 |
| eqtl-a-ENSG00000103522 | ebi-a-GCST90018832 | Diabetic nephropathy || id:ebi-a-GCST90018832 | IL21R | 0.02179142 | 0.04177438 | 0.65393287 |
| eqtl-a-ENSG00000104450 | ebi-a-GCST90018832 | Diabetic nephropathy || id:ebi-a-GCST90018832 | SPAG1 | 0.07695175 | 0.11435906 | 0.57034704 |
| eqtl-a-ENSG00000104856 | ebi-a-GCST90018832 | Diabetic nephropathy || id:ebi-a-GCST90018832 | RELB | -0.0819624 | 0.08332261 | 0.380967 |
| eqtl-a-ENSG00000105866 | ebi-a-GCST90018832 | Diabetic nephropathy || id:ebi-a-GCST90018832 | SP4 | NA | NA | NA |
| eqtl-a-ENSG00000105983 | ebi-a-GCST90018832 | Diabetic nephropathy || id:ebi-a-GCST90018832 | LMBR1 | -0.0600626 | 0.06988297 | 0.54801986 |
| eqtl-a-ENSG00000106948 | ebi-a-GCST90018832 | Diabetic nephropathy || id:ebi-a-GCST90018832 | AKNA | NA | NA | NA |
| eqtl-a-ENSG00000107643 | ebi-a-GCST90018832 | Diabetic nephropathy || id:ebi-a-GCST90018832 | MAPK8 | NA | NA | NA |
| eqtl-a-ENSG00000109320 | ebi-a-GCST90018832 | Diabetic nephropathy || id:ebi-a-GCST90018832 | NFKB1 | 0.23254839 | 0.1841787 | 0.42643645 |
| eqtl-a-ENSG00000109762 | ebi-a-GCST90018832 | Diabetic nephropathy || id:ebi-a-GCST90018832 | SNX25 | 0.12601088 | 0.10645561 | 0.35815853 |
| eqtl-a-ENSG00000111266 | ebi-a-GCST90018832 | Diabetic nephropathy || id:ebi-a-GCST90018832 | DUSP16 | 0.17734148 | 0.05463108 | 0.04762774 |
| eqtl-a-ENSG00000112182 | ebi-a-GCST90018832 | Diabetic nephropathy || id:ebi-a-GCST90018832 | BACH2 | 0.04157832 | 0.03851661 | 0.39324763 |
| eqtl-a-ENSG00000113580 | ebi-a-GCST90018832 | Diabetic nephropathy || id:ebi-a-GCST90018832 | NR3C1 | NA | NA | NA |
| eqtl-a-ENSG00000115902 | ebi-a-GCST90018832 | Diabetic nephropathy || id:ebi-a-GCST90018832 | SLC1A4 | -0.1309334 | 0.18682105 | 0.610837 |
| eqtl-a-ENSG00000116874 | ebi-a-GCST90018832 | Diabetic nephropathy || id:ebi-a-GCST90018832 | WARS2 | 0.05627879 | 0.06092738 | 0.40791851 |
| eqtl-a-ENSG00000119725 | ebi-a-GCST90018832 | Diabetic nephropathy || id:ebi-a-GCST90018832 | ZNF410 | NA | NA | NA |
| eqtl-a-ENSG00000119801 | ebi-a-GCST90018832 | Diabetic nephropathy || id:ebi-a-GCST90018832 | YPEL5 | -0.0061204 | 0.11114251 | 0.96497821 |
| eqtl-a-ENSG00000119986 | ebi-a-GCST90018832 | Diabetic nephropathy || id:ebi-a-GCST90018832 | AVPI1 | NA | NA | NA |
| eqtl-a-ENSG00000120539 | ebi-a-GCST90018832 | Diabetic nephropathy || id:ebi-a-GCST90018832 | MASTL | -0.2645546 | 0.15003227 | 0.17604638 |
| eqtl-a-ENSG00000120784 | ebi-a-GCST90018832 | Diabetic nephropathy || id:ebi-a-GCST90018832 | ZFP30 | NA | NA | NA |
| eqtl-a-ENSG00000121274 | ebi-a-GCST90018832 | Diabetic nephropathy || id:ebi-a-GCST90018832 | TENT4B | NA | NA | NA |
| eqtl-a-ENSG00000125772 | ebi-a-GCST90018832 | Diabetic nephropathy || id:ebi-a-GCST90018832 | GPCPD1 | 0.04172275 | 0.04482699 | 0.4046696 |
| eqtl-a-ENSG00000126353 | ebi-a-GCST90018832 | Diabetic nephropathy || id:ebi-a-GCST90018832 | CCR7 | -0.0037554 | 0.15429768 | 0.982111 |
| eqtl-a-ENSG00000126838 | ebi-a-GCST90018832 | Diabetic nephropathy || id:ebi-a-GCST90018832 | PZP | 0.05367072 | 0.09198541 | 0.6637525 |
| eqtl-a-ENSG00000128656 | ebi-a-GCST90018832 | Diabetic nephropathy || id:ebi-a-GCST90018832 | CHN1 | -0.0387905 | 0.02998992 | 0.26549466 |
| eqtl-a-ENSG00000130449 | ebi-a-GCST90018832 | Diabetic nephropathy || id:ebi-a-GCST90018832 | ZSWIM6 | NA | NA | NA |
| eqtl-a-ENSG00000130844 | ebi-a-GCST90018832 | Diabetic nephropathy || id:ebi-a-GCST90018832 | ZNF331 | NA | NA | NA |
| eqtl-a-ENSG00000131196 | ebi-a-GCST90018832 | Diabetic nephropathy || id:ebi-a-GCST90018832 | NFATC1 | NA | NA | NA |
| eqtl-a-ENSG00000131323 | ebi-a-GCST90018832 | Diabetic nephropathy || id:ebi-a-GCST90018832 | TRAF3 | 0.02624885 | 0.05647817 | 0.6737565 |
| eqtl-a-ENSG00000131378 | ebi-a-GCST90018832 | Diabetic nephropathy || id:ebi-a-GCST90018832 | RFTN1 | 0.00047472 | 0.1390015 | 0.99782583 |
| eqtl-a-ENSG00000132510 | ebi-a-GCST90018832 | Diabetic nephropathy || id:ebi-a-GCST90018832 | KDM6B | NA | NA | NA |
| eqtl-a-ENSG00000133962 | ebi-a-GCST90018832 | Diabetic nephropathy || id:ebi-a-GCST90018832 | CATSPERB | NA | NA | NA |
| eqtl-a-ENSG00000135040 | ebi-a-GCST90018832 | Diabetic nephropathy || id:ebi-a-GCST90018832 | NAA35 | NA | NA | NA |
| eqtl-a-ENSG00000135114 | ebi-a-GCST90018832 | Diabetic nephropathy || id:ebi-a-GCST90018832 | OASL | 0.032857 | 0.04126766 | 0.45207209 |
| eqtl-a-ENSG00000135249 | ebi-a-GCST90018832 | Diabetic nephropathy || id:ebi-a-GCST90018832 | RINT1 | -0.1533093 | 0.39793338 | 0.76589043 |
| eqtl-a-ENSG00000135541 | ebi-a-GCST90018832 | Diabetic nephropathy || id:ebi-a-GCST90018832 | AHI1 | 0.0825812 | 0.1541541 | 0.64576224 |
| eqtl-a-ENSG00000136052 | ebi-a-GCST90018832 | Diabetic nephropathy || id:ebi-a-GCST90018832 | SLC41A2 | 0.05661258 | 0.07059352 | 0.56968975 |
| eqtl-a-ENSG00000136603 | ebi-a-GCST90018832 | Diabetic nephropathy || id:ebi-a-GCST90018832 | SKIL | NA | NA | NA |
| eqtl-a-ENSG00000137055 | ebi-a-GCST90018832 | Diabetic nephropathy || id:ebi-a-GCST90018832 | PLAA | NA | NA | NA |
| eqtl-a-ENSG00000137601 | ebi-a-GCST90018832 | Diabetic nephropathy || id:ebi-a-GCST90018832 | NEK1 | NA | NA | NA |
| eqtl-a-ENSG00000137656 | ebi-a-GCST90018832 | Diabetic nephropathy || id:ebi-a-GCST90018832 | BUD13 | NA | NA | NA |
| eqtl-a-ENSG00000138074 | ebi-a-GCST90018832 | Diabetic nephropathy || id:ebi-a-GCST90018832 | SLC5A6 | -0.0298121 | 0.08581841 | 0.76145241 |
| eqtl-a-ENSG00000138378 | ebi-a-GCST90018832 | Diabetic nephropathy || id:ebi-a-GCST90018832 | STAT4 | NA | NA | NA |
| eqtl-a-ENSG00000138399 | ebi-a-GCST90018832 | Diabetic nephropathy || id:ebi-a-GCST90018832 | FASTKD1 | 0.09162213 | 0.05812308 | 0.35989057 |
| eqtl-a-ENSG00000139044 | ebi-a-GCST90018832 | Diabetic nephropathy || id:ebi-a-GCST90018832 | B4GALNT3 | -0.0929616 | 0.09940298 | 0.52130954 |
| eqtl-a-ENSG00000139514 | ebi-a-GCST90018832 | Diabetic nephropathy || id:ebi-a-GCST90018832 | SLC7A1 | 0.04337238 | 0.04810871 | 0.46244761 |
| eqtl-a-ENSG00000140470 | ebi-a-GCST90018832 | Diabetic nephropathy || id:ebi-a-GCST90018832 | ADAMTS17 | 0.0517045 | 0.08150618 | 0.64011633 |
| eqtl-a-ENSG00000141543 | ebi-a-GCST90018832 | Diabetic nephropathy || id:ebi-a-GCST90018832 | EIF4A3 | NA | NA | NA |
| eqtl-a-ENSG00000141968 | ebi-a-GCST90018832 | Diabetic nephropathy || id:ebi-a-GCST90018832 | VAV1 | NA | NA | NA |
| eqtl-a-ENSG00000142039 | ebi-a-GCST90018832 | Diabetic nephropathy || id:ebi-a-GCST90018832 | CCDC97 | NA | NA | NA |
| eqtl-a-ENSG00000143384 | ebi-a-GCST90018832 | Diabetic nephropathy || id:ebi-a-GCST90018832 | ADAMTSL4-AS1 | -0.0291859 | 0.08419944 | 0.78758078 |
| eqtl-a-ENSG00000143924 | ebi-a-GCST90018832 | Diabetic nephropathy || id:ebi-a-GCST90018832 | EML4 | 0.03109688 | 0.03348925 | 0.451143 |
| eqtl-a-ENSG00000144655 | ebi-a-GCST90018832 | Diabetic nephropathy || id:ebi-a-GCST90018832 | CSRNP1 | 0.07843945 | 0.07262787 | 0.47552123 |
| eqtl-a-ENSG00000146350 | ebi-a-GCST90018832 | Diabetic nephropathy || id:ebi-a-GCST90018832 | TBC1D32 | NA | NA | NA |
| eqtl-a-ENSG00000149262 | ebi-a-GCST90018832 | Diabetic nephropathy || id:ebi-a-GCST90018832 | INTS4 | -0.0021237 | 0.04635738 | 0.97085558 |
| eqtl-a-ENSG00000151327 | ebi-a-GCST90018832 | Diabetic nephropathy || id:ebi-a-GCST90018832 | FAM177A1 | -0.0244931 | 0.06700321 | 0.77688982 |
| eqtl-a-ENSG00000151466 | ebi-a-GCST90018832 | Diabetic nephropathy || id:ebi-a-GCST90018832 | SCLT1 | -0.1220937 | 0.07086039 | 0.33477665 |
| eqtl-a-ENSG00000152409 | ebi-a-GCST90018832 | Diabetic nephropathy || id:ebi-a-GCST90018832 | JMY | NA | NA | NA |
| eqtl-a-ENSG00000152969 | ebi-a-GCST90018832 | Diabetic nephropathy || id:ebi-a-GCST90018832 | JAKMIP1 | NA | NA | NA |
| eqtl-a-ENSG00000154645 | ebi-a-GCST90018832 | Diabetic nephropathy || id:ebi-a-GCST90018832 | CHODL | NA | NA | NA |
| eqtl-a-ENSG00000156110 | ebi-a-GCST90018832 | Diabetic nephropathy || id:ebi-a-GCST90018832 | ADK | -0.2090148 | 0.10966367 | 0.11498033 |
| eqtl-a-ENSG00000158321 | ebi-a-GCST90018832 | Diabetic nephropathy || id:ebi-a-GCST90018832 | AUTS2 | 0.00670423 | 0.03053483 | 0.83171244 |
| eqtl-a-ENSG00000159459 | ebi-a-GCST90018832 | Diabetic nephropathy || id:ebi-a-GCST90018832 | UBR1 | NA | NA | NA |
| eqtl-a-ENSG00000159733 | ebi-a-GCST90018832 | Diabetic nephropathy || id:ebi-a-GCST90018832 | ZFYVE28 | NA | NA | NA |
| eqtl-a-ENSG00000160307 | ebi-a-GCST90018832 | Diabetic nephropathy || id:ebi-a-GCST90018832 | S100B | 0.07372724 | 0.03573075 | 0.10803379 |
| eqtl-a-ENSG00000160789 | ebi-a-GCST90018832 | Diabetic nephropathy || id:ebi-a-GCST90018832 | LMNA | -0.0250357 | 0.03084996 | 0.44804962 |
| eqtl-a-ENSG00000162415 | ebi-a-GCST90018832 | Diabetic nephropathy || id:ebi-a-GCST90018832 | ZSWIM5 | NA | NA | NA |
| eqtl-a-ENSG00000163421 | ebi-a-GCST90018832 | Diabetic nephropathy || id:ebi-a-GCST90018832 | PROK2 | 0.01863745 | 0.02587435 | 0.48783176 |
| eqtl-a-ENSG00000163600 | ebi-a-GCST90018832 | Diabetic nephropathy || id:ebi-a-GCST90018832 | ICOS | 0.09558966 | 0.10557024 | 0.53156011 |
| eqtl-a-ENSG00000163659 | ebi-a-GCST90018832 | Diabetic nephropathy || id:ebi-a-GCST90018832 | TIPARP | -0.076326 | 0.05016427 | 0.22548104 |
| eqtl-a-ENSG00000164048 | ebi-a-GCST90018832 | Diabetic nephropathy || id:ebi-a-GCST90018832 | ZNF589 | 0.00081847 | 0.13243901 | 0.99606577 |
| eqtl-a-ENSG00000164574 | ebi-a-GCST90018832 | Diabetic nephropathy || id:ebi-a-GCST90018832 | GALNT10 | 0.12824188 | 0.18293982 | 0.55588128 |
| eqtl-a-ENSG00000166377 | ebi-a-GCST90018832 | Diabetic nephropathy || id:ebi-a-GCST90018832 | ATP9B | -0.1262358 | 0.13077634 | 0.51124583 |
| eqtl-a-ENSG00000167094 | ebi-a-GCST90018832 | Diabetic nephropathy || id:ebi-a-GCST90018832 | TTC16 | -0.0011144 | 0.03412673 | 0.97691598 |
| eqtl-a-ENSG00000167325 | ebi-a-GCST90018832 | Diabetic nephropathy || id:ebi-a-GCST90018832 | RRM1 | 0.13943754 | 0.07135082 | 0.1898738 |
| eqtl-a-ENSG00000167552 | ebi-a-GCST90018832 | Diabetic nephropathy || id:ebi-a-GCST90018832 | TUBA1A | NA | NA | NA |
| eqtl-a-ENSG00000168026 | ebi-a-GCST90018832 | Diabetic nephropathy || id:ebi-a-GCST90018832 | TTC21A | -0.0361386 | 0.07596755 | 0.71732287 |
| eqtl-a-ENSG00000171033 | ebi-a-GCST90018832 | Diabetic nephropathy || id:ebi-a-GCST90018832 | PKIA | -0.0121598 | 0.05950072 | 0.84388375 |
| eqtl-a-ENSG00000171208 | ebi-a-GCST90018832 | Diabetic nephropathy || id:ebi-a-GCST90018832 | NETO2 | NA | NA | NA |
| eqtl-a-ENSG00000171723 | ebi-a-GCST90018832 | Diabetic nephropathy || id:ebi-a-GCST90018832 | GPHN | -0.0587669 | 0.27287938 | 0.86496092 |
| eqtl-a-ENSG00000173226 | ebi-a-GCST90018832 | Diabetic nephropathy || id:ebi-a-GCST90018832 | IQCB1 | -0.0723185 | 0.13347999 | 0.62561216 |
| eqtl-a-ENSG00000173588 | ebi-a-GCST90018832 | Diabetic nephropathy || id:ebi-a-GCST90018832 | CEP83 | -0.1587449 | 0.14058563 | 0.46142602 |
| eqtl-a-ENSG00000174007 | ebi-a-GCST90018832 | Diabetic nephropathy || id:ebi-a-GCST90018832 | CEP19 | 0.00350885 | 0.03336813 | 0.9213144 |
| eqtl-a-ENSG00000175197 | ebi-a-GCST90018832 | Diabetic nephropathy || id:ebi-a-GCST90018832 | DDIT3 | 0.09755463 | 0.13038753 | 0.59107263 |
| eqtl-a-ENSG00000175931 | ebi-a-GCST90018832 | Diabetic nephropathy || id:ebi-a-GCST90018832 | UBE2O | 0.0379743 | 0.04514825 | 0.48882643 |
| eqtl-a-ENSG00000176095 | ebi-a-GCST90018832 | Diabetic nephropathy || id:ebi-a-GCST90018832 | IP6K1 | 0.03721953 | 0.24972413 | 0.90580991 |
| eqtl-a-ENSG00000176531 | ebi-a-GCST90018832 | Diabetic nephropathy || id:ebi-a-GCST90018832 | PHLDB3 | 0.204079 | 0.26826518 | 0.5859827 |
| eqtl-a-ENSG00000178623 | ebi-a-GCST90018832 | Diabetic nephropathy || id:ebi-a-GCST90018832 | GPR35 | 0.00288146 | 0.07080683 | 0.97410727 |
| eqtl-a-ENSG00000178764 | ebi-a-GCST90018832 | Diabetic nephropathy || id:ebi-a-GCST90018832 | ZHX2 | NA | NA | NA |
| eqtl-a-ENSG00000179820 | ebi-a-GCST90018832 | Diabetic nephropathy || id:ebi-a-GCST90018832 | MYADM | 0.01827564 | 0.05886602 | 0.77171411 |
| eqtl-a-ENSG00000180875 | ebi-a-GCST90018832 | Diabetic nephropathy || id:ebi-a-GCST90018832 | GREM2 | 0.04135073 | 0.09867146 | 0.74736296 |
| eqtl-a-ENSG00000182463 | ebi-a-GCST90018832 | Diabetic nephropathy || id:ebi-a-GCST90018832 | TSHZ2 | -0.0559174 | 0.0407705 | 0.21929181 |
| eqtl-a-ENSG00000183049 | ebi-a-GCST90018832 | Diabetic nephropathy || id:ebi-a-GCST90018832 | CAMK1D | -0.0041783 | 0.06149552 | 0.94846354 |
| eqtl-a-ENSG00000183570 | ebi-a-GCST90018832 | Diabetic nephropathy || id:ebi-a-GCST90018832 | PCBP3 | 0.08212498 | 0.09269 | 0.46908176 |
| eqtl-a-ENSG00000184178 | ebi-a-GCST90018832 | Diabetic nephropathy || id:ebi-a-GCST90018832 | SCFD2 | -0.1144215 | 0.06964274 | 0.34807582 |
| eqtl-a-ENSG00000184220 | ebi-a-GCST90018832 | Diabetic nephropathy || id:ebi-a-GCST90018832 | CMSS1 | -0.001162 | 0.05601591 | 0.98533279 |
| eqtl-a-ENSG00000184588 | ebi-a-GCST90018832 | Diabetic nephropathy || id:ebi-a-GCST90018832 | PDE4B | -0.5611599 | 1.24296541 | 0.73002574 |
| eqtl-a-ENSG00000186469 | ebi-a-GCST90018832 | Diabetic nephropathy || id:ebi-a-GCST90018832 | GNG2 | -0.0078303 | 0.0575512 | 0.91391088 |
| eqtl-a-ENSG00000187010 | ebi-a-GCST90018832 | Diabetic nephropathy || id:ebi-a-GCST90018832 | RHD | -0.0081244 | 0.07341677 | 0.91887235 |
| eqtl-a-ENSG00000187260 | ebi-a-GCST90018832 | Diabetic nephropathy || id:ebi-a-GCST90018832 | WDR86 | 0.00087231 | 0.05644213 | 0.99016181 |
| eqtl-a-ENSG00000196189 | ebi-a-GCST90018832 | Diabetic nephropathy || id:ebi-a-GCST90018832 | SEMA4A | -0.0153942 | 0.03999243 | 0.70835178 |
| eqtl-a-ENSG00000196352 | ebi-a-GCST90018832 | Diabetic nephropathy || id:ebi-a-GCST90018832 | CD55 | 0.14343971 | 0.0359282 | 0.01623245 |
| eqtl-a-ENSG00000196843 | ebi-a-GCST90018832 | Diabetic nephropathy || id:ebi-a-GCST90018832 | ARID5A | NA | NA | NA |
| eqtl-a-ENSG00000197121 | ebi-a-GCST90018832 | Diabetic nephropathy || id:ebi-a-GCST90018832 | PGAP1 | -0.008565 | 0.0803965 | 0.9324331 |
| eqtl-a-ENSG00000197279 | ebi-a-GCST90018832 | Diabetic nephropathy || id:ebi-a-GCST90018832 | ZNF165 | 0.05029017 | 0.4165835 | 0.92351704 |
| eqtl-a-ENSG00000198380 | ebi-a-GCST90018832 | Diabetic nephropathy || id:ebi-a-GCST90018832 | GFPT1 | 0.0088552 | 0.04807046 | 0.87083306 |
| eqtl-a-ENSG00000198848 | ebi-a-GCST90018832 | Diabetic nephropathy || id:ebi-a-GCST90018832 | CES1 | -0.0616944 | 0.06497182 | 0.41239118 |
| eqtl-a-ENSG00000204178 | ebi-a-GCST90018832 | Diabetic nephropathy || id:ebi-a-GCST90018832 | MACO1 | NA | NA | NA |
| eqtl-a-ENSG00000204519 | ebi-a-GCST90018832 | Diabetic nephropathy || id:ebi-a-GCST90018832 | ZNF551 | 0.00383046 | 0.06982441 | 0.96511097 |
| eqtl-a-ENSG00000211778 | ebi-a-GCST90018832 | Diabetic nephropathy || id:ebi-a-GCST90018832 | TRAV4 | -0.0092321 | 0.06491117 | 0.91005919 |
| eqtl-a-ENSG00000211780 | ebi-a-GCST90018832 | Diabetic nephropathy || id:ebi-a-GCST90018832 | TRAV6 | 0.69868712 | 0.36851898 | 0.30899087 |
| eqtl-a-ENSG00000213639 | ebi-a-GCST90018832 | Diabetic nephropathy || id:ebi-a-GCST90018832 | PPP1CB | -0.003653 | 0.15313247 | 0.98481605 |
| eqtl-a-ENSG00000215244 | ebi-a-GCST90018832 | Diabetic nephropathy || id:ebi-a-GCST90018832 | LINC02649 | -0.0311482 | 0.04628558 | 0.57031495 |
| eqtl-a-ENSG00000231074 | ebi-a-GCST90018832 | Diabetic nephropathy || id:ebi-a-GCST90018832 | HCG18 | -0.026728 | 0.08053914 | 0.79600945 |
| eqtl-a-ENSG00000231682 | ebi-a-GCST90018832 | Diabetic nephropathy || id:ebi-a-GCST90018832 | LINC01891 | NA | NA | NA |
| eqtl-a-ENSG00000233806 | ebi-a-GCST90018832 | Diabetic nephropathy || id:ebi-a-GCST90018832 | LINC01237 | NA | NA | NA |
| eqtl-a-ENSG00000238197 | ebi-a-GCST90018832 | Diabetic nephropathy || id:ebi-a-GCST90018832 | PAXBP1-AS1 | NA | NA | NA |
| eqtl-a-ENSG00000239653 | ebi-a-GCST90018832 | Diabetic nephropathy || id:ebi-a-GCST90018832 | PSMD6-AS2 | NA | NA | NA |
| eqtl-a-ENSG00000239704 | ebi-a-GCST90018832 | Diabetic nephropathy || id:ebi-a-GCST90018832 | CDRT4 | NA | NA | NA |
| eqtl-a-ENSG00000245105 | ebi-a-GCST90018832 | Diabetic nephropathy || id:ebi-a-GCST90018832 | A2M-AS1 | NA | NA | NA |
| eqtl-a-ENSG00000256223 | ebi-a-GCST90018832 | Diabetic nephropathy || id:ebi-a-GCST90018832 | ZNF10 | NA | NA | NA |
